# Supplementary material for: Nickel-catalysed C–N cross-coupling of organoboronic acids and isoxazoles
Source: Royal Society of Chemistry journal article supplement (doi:10.1039/d4qo01050g), 2024-01-01

## SUPPORTING INFORMATION

---

Supporting Information

### **Nickel-Catalysed C-N Cross-coupling of Organoboronic Acids and Isoxazoles**

Yupeng Zhao,<sup>a†</sup> Changshu Wu,<sup>a†</sup> Jiaming Zhang,<sup>a</sup> Yang Gao,<sup>\*a, b</sup> Zhuoxuan Yuan,<sup>a</sup> Xianwei Li<sup>a</sup>,  
Qian Chen,<sup>a</sup> and Yanping Huo<sup>a, b</sup>

# SUPPORTING INFORMATION

---

## Table of Contents

|                                                                                       |    |
|---------------------------------------------------------------------------------------|----|
| Table of Contents .....                                                               | 2  |
| 1. <u>General Methods</u> .....                                                       | 3  |
| 2. <u>Supplementary information for the optimization of reaction conditions</u> ..... | 4  |
| 3. <u>Supplementary information on the reaction mechanism</u> .....                   | 6  |
| 4. <u>Synthesis and Characterization of the Corresponding Products</u> .....          | 8  |
| 5. <u>References</u> .....                                                            | 27 |
| 6. <u>NMR Spectra</u> .....                                                           | 28 |

### 1. General Methods

#### 1.1 General analytical information:

All reactions were performed in oven-dried glassware containing a Teflon-coated stirring bar and dry septum under argon atmosphere. All optimization reactions were monitored by  $^1\text{H}$  NMR using 1,3,5-trimethoxybenzene as an internal standard. NMR spectra were recorded at ambient temperature using  $\text{CDCl}_3$  as solvent, with proton, carbon, and fluorine resonances at 400, 100 and 375 MHz, respectively. All NMR data are reported in ppm relative to the solvent signal. Data are reported as follows: chemical shift, multiplicity (s = singlet, d = doublet, t = triplet, q = quartet, m = multiplet), coupling constants (Hz) and integration. Column chromatography was performed with 200-300 mesh silica gel plates ( $\text{GF}_{254}$ ), and visualization was effected at 254 nm. TLC was performed using commercially prepared 100-400 mesh silica gel plates ( $\text{GF}_{254}$ ). Mass spectral data were acquired on a Varian GC-MS Saturn 2100 T. The ionization was achieved by EI AGC. HRMS analyses were carried out on a Waters GCT Premier CAB163 with a TOF mass analyzer. The MS ionization was achieved by  $\text{EI}^+$ . Melting points were measured on a Mettler FP 61 and are uncorrected. Parallel heating mantle were used in our experiments.

#### 1.2 General reagent information:

All solvents were purified and dried by passage through alumina and Q5 reactant-packed columns on a solvent purification system. Commercial reagents were purchased from Aldrich Chemical and Bide Pharmatech, and were used as received.

#### 1.3 General procedure A for the synthesis of compound 3.

An oven-dried 20 mL vial equipped with a Teflon-coated stirring bar was charged with  $\text{Ni}(\text{acac})_2$  (10 mol%),  $\text{K}_3\text{PO}_4$  (0.2 mmol) and organoboronic acid (0.3 mmol), and closed with a septum cap. Then, 1,4-dioxane (1 mL) and isoxzale (0.2 mmol) were successively added via syringe. The mixture was stirred under air at 80 °C for 10 h. After completion of the reaction, the resulting mixture was diluted with 10 mL diethyl ether and filtered through a Celite pipette. The filtrate was washed with brine (3 mL), dried over anhydrous  $\text{MgSO}_4$ , filtered, and the organic phase was evaporated under reduced pressure (rotary evaporator). The residue was purified by column chromatography ( $\text{SiO}_2$ , ethyl acetate/petroleum ether gradient).

## 2. Supplementary information for the optimization of reaction conditions.

**Table S1. Screening of isoxazole derivatives<sup>a</sup>**

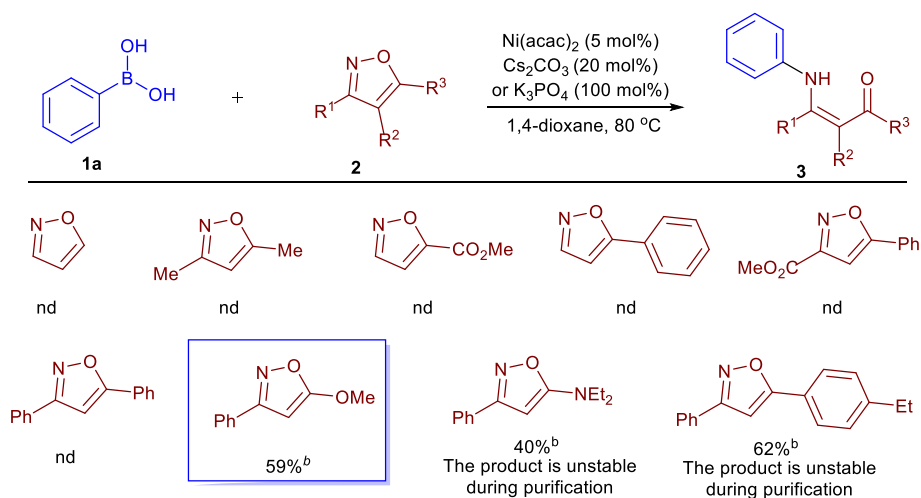

<sup>a</sup> Reaction conditions: phenylboronic acid **1a** (0.10 mmol), isoxazole derivatives **2** (0.10 mmol), Ni(acac)<sub>2</sub> (10 mol%), Cs<sub>2</sub>CO<sub>3</sub> (20 mol%), 1,4-dioxane (1.0 mL) under 100 °C for overnight. <sup>b</sup> Yield was determined by <sup>1</sup>H NMR analysis with 1,3,5-trimethoxybenzene as an internal standard.

**Table S2. Optimisation of transition metal-catalysts<sup>a</sup>**

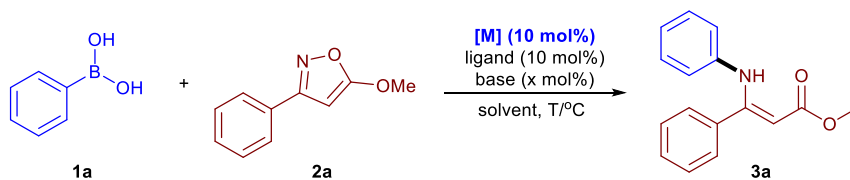

| Entry           | Catalyst                                              | Yield (%) <sup>b</sup> |
|-----------------|-------------------------------------------------------|------------------------|
| 1               | Ni(acac) <sub>2</sub>                                 | 66                     |
| 2               | NiCl <sub>2</sub>                                     | nd                     |
| 3               | Ni(ClO <sub>4</sub> ) <sub>2</sub> ·6H <sub>2</sub> O | nd                     |
| 4               | Ni(BF <sub>4</sub> ) <sub>2</sub> ·6H <sub>2</sub> O  | nd                     |
| 5               | Ni(OAc) <sub>2</sub> ·4H <sub>2</sub> O               | nd                     |
| 6 <sup>c</sup>  | Ni(OAc) <sub>2</sub> ·4H <sub>2</sub> O               | trace                  |
| 7               | -                                                     | nd                     |
| 8 <sup>d</sup>  | Ni(acac) <sub>2</sub>                                 | 49                     |
| 9 <sup>e</sup>  | Ni(acac) <sub>2</sub>                                 | 19                     |
| 10 <sup>f</sup> | Ni(acac) <sub>2</sub>                                 | 16                     |
| 11              | Cu(OAc) <sub>2</sub>                                  | nd                     |
| 12              | CoCl <sub>2</sub>                                     | nd                     |
| 13              | Co(acac) <sub>2</sub>                                 | nd                     |

## SUPPORTING INFORMATION

|                 |                                       |    |
|-----------------|---------------------------------------|----|
| 14              | Ni( <sup>f</sup> Buacac) <sub>2</sub> | 60 |
| 15 <sup>c</sup> | NiCl <sub>2</sub>                     | 20 |
| 16 <sup>c</sup> | NiI <sub>2</sub>                      | 59 |

<sup>a</sup> Reaction conditions: phenylboronic acid **1a** (0.15 mmol), 5-methoxy-3-phenylisoxazole **2a** (0.10 mmol), Ni(acac)<sub>2</sub> (10 mol%), Cs<sub>2</sub>CO<sub>3</sub> (20 mol%), 1,4-dioxane (1.0 mL) under 80 °C for 10 h. <sup>b</sup> Yield was determined by <sup>1</sup>H NMR analysis with 1,3,5-trimethoxybenzene as an internal standard. <sup>c</sup> acac (20 mol%) was added. <sup>d</sup> PPh<sub>3</sub> (10 mol%) was added. <sup>e</sup> PPh<sub>3</sub> (10 mol%) was added and no Cs<sub>2</sub>CO<sub>3</sub>. <sup>f</sup> No Cs<sub>2</sub>CO<sub>3</sub>.

**Table S3. Optimisation of solvents<sup>a</sup>**

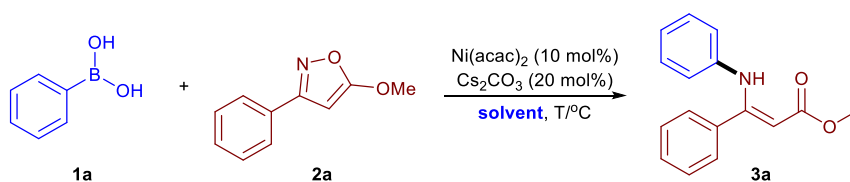

| Entry | Solvent     | Yield (%) <sup>b</sup> |
|-------|-------------|------------------------|
| 1     | 1,4-dioxane | 66                     |
| 2     | DMSO        | trace                  |
| 3     | NMP         | nd                     |
| 4     | DMA         | trace                  |
| 5     | Tol         | 58                     |
| 6     | MeCN        | 25                     |
| 7     | DCE         | 59                     |

<sup>a</sup> Reaction conditions: phenylboronic acid **1a** (0.15 mmol), 5-methoxy-3-phenylisoxazole **2a** (0.10 mmol), Ni(acac)<sub>2</sub> (10 mol%), Cs<sub>2</sub>CO<sub>3</sub> (20 mol%), solvent (1.0 mL) at 80 °C for 10 h. <sup>b</sup> Yield was determined by <sup>1</sup>H NMR analysis with 1,3,5-trimethoxybenzene as an internal standard.

**Table S4. Optimisation of bases<sup>a</sup>**

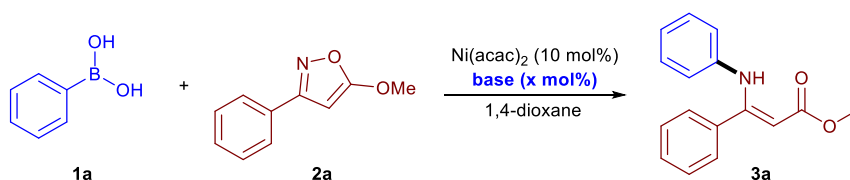

| Entry | Base                            | Yield (%) <sup>b</sup> |
|-------|---------------------------------|------------------------|
| 1     | none                            | 66                     |
| 2     | K <sub>2</sub> CO <sub>3</sub>  | nd                     |
| 3     | Na <sub>2</sub> CO <sub>3</sub> | trace                  |

## SUPPORTING INFORMATION

|                 |                                    |                           |
|-----------------|------------------------------------|---------------------------|
| 4               | t-BuOK                             | trace                     |
| 5               | KOAc                               | 26                        |
| 6               | K <sub>3</sub> PO <sub>4</sub>     | 70                        |
| 7 <sup>c</sup>  | <b>K<sub>3</sub>PO<sub>4</sub></b> | <b>90, 93<sup>d</sup></b> |
| 10 <sup>e</sup> | Cs <sub>2</sub> CO <sub>3</sub>    | 82                        |

<sup>a</sup> Reaction conditions: phenylboronic acid **1a** (0.15 mmol), 5-methoxy-3-phenylisoxazole **2a** (0.10 mmol), Ni(acac)<sub>2</sub> (10 mol%), base (20 mol%), 1,4-dioxane (1.0 mL) at 80 °C for 10 h. <sup>b</sup> Yield was determined by <sup>1</sup>H NMR analysis with 1,3,5-trimethoxybenzene as an internal standard. <sup>c</sup> K<sub>3</sub>PO<sub>4</sub> (1.0 equiv) was used. <sup>d</sup> Isolated yield. <sup>e</sup> Cs<sub>2</sub>CO<sub>3</sub> (1.0 equiv) was used.

**Table S5. Optimisation of ligands<sup>a</sup>**

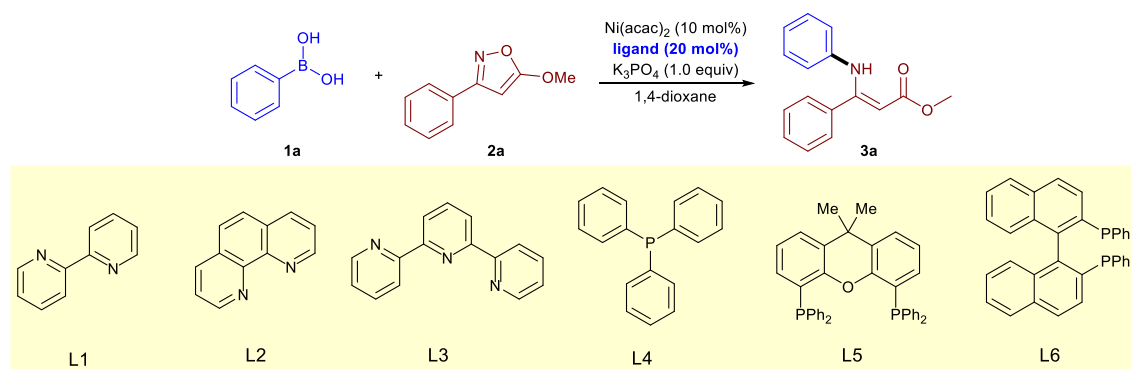

| Entry | Ligand         | Yield (%) <sup>b</sup> |
|-------|----------------|------------------------|
| 1     | -              | <b>90</b>              |
| 2     | L <sub>1</sub> | nd                     |
| 3     | L <sub>2</sub> | trace                  |
| 4     | L <sub>3</sub> | nd                     |
| 5     | L <sub>4</sub> | 69                     |
| 6     | L <sub>5</sub> | 72                     |
| 7     | L <sub>6</sub> | 65                     |

<sup>a</sup> Reaction conditions: phenylboronic acid **1a** (0.15 mmol), 5-methoxy-3-phenylisoxazole **2a** (0.10 mmol), Ni(acac)<sub>2</sub> (10 mol%), K<sub>3</sub>PO<sub>4</sub> (1.0 equiv), Ligand (10 mol%), 1,4-dioxane (1.0 mL) at 80 °C for 10 h. <sup>b</sup> Yield was determined by <sup>1</sup>H NMR analysis with 1,3,5-trimethoxybenzene as an internal standard.

### **3. Supplementary information on the reaction mechanism.**

### 3.1 For the generation of Ni(I) species.

According to Liu's work,  $L_nNi^{+1}(acac)$  can be formed via the reaction of  $Ni(acac)_2$  and phenylboronic acid. First, transmetallation of phenylboronic acid with  $Ni(acac)_2$  gives diphenylnickel<sup>+2</sup> species, which undergoes reductive elimination to form a Ni(0) species. Then,  $L_nNi^{+1}(acac)$  can be formed via the comproportion of Ni(0) and  $Ni(acac)_2$ .

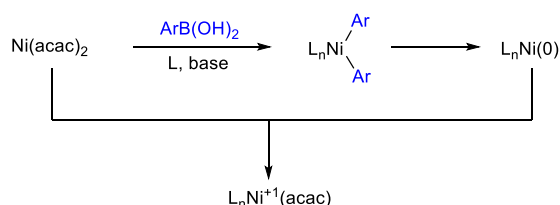

### 3.2 Simulating the C-N bond reductive elimination process.

The reaction of arylnickel complex **10** and methyl (Z)-3-amino-3-phenylacrylate (**9**) was carried out to simulate C-N bond reductive elimination from a Ni(II) intermediate. However, the desired C-N coupling product **3n** was not readily formed with either  $K_3PO_4$  or  $NaO^tBu$  as base, which indicated that C-N reductive elimination from the corresponding Ni(II) intermediate is difficult under the current conditions. The result is consistent with the literature report, which documents that C-N bond reductive elimination from Ni(II) intermediate usually has high energy barrier, and sterically hindered ligand is needed to promote this chemical process.

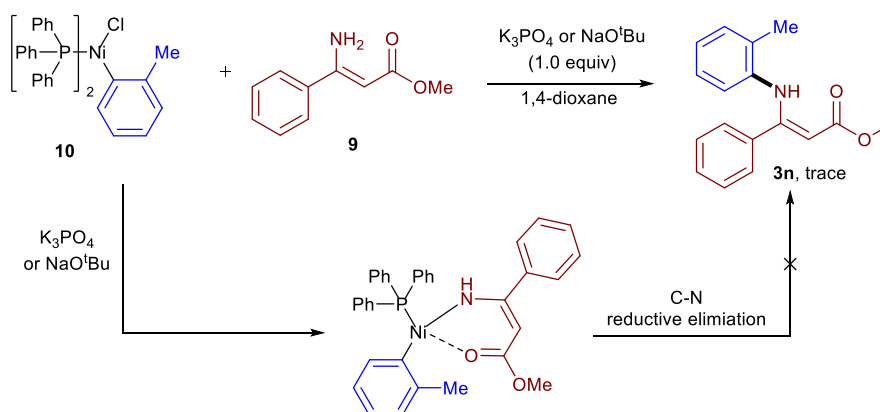

### 3.3 The reaction of arylnickel complex **10** and isoxazole.

The reaction of arylnickel complex **10** and isoxazole was carried out in 1,4-dioxane without any additives, and the desired C-N coupling product **3n** was detected in 50% yield. In addition, a certain amount of triphenylphosphine oxide and methyl (Z)-3-amino-3-phenylacrylate (**9**) was detected in this reaction, which may be formed via the hydrolysis of corresponding iminophosphorane, a known adduct derived from nitrene

## SUPPORTING INFORMATION

transfer to phosphine. This result indicates that a polarity reversed amine source is crucial for the C-N bond formation and an arylnickel(I or II) species may be a reactive intermediate in this reaction.

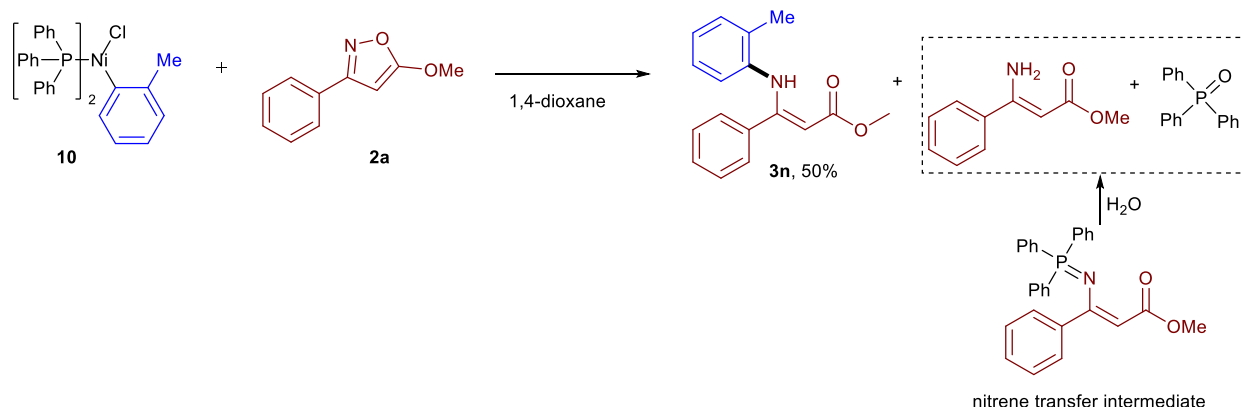

### 3.4 Proposed Ni(0)/Ni(II) catalytic cycle.

The in-situ generated Ni(0) first undergoes oxidative addition with isoxazole through N-O bond cleavage to give cyclonickel(II) **I**. The transmetalation of intermediate **I** with  $\text{PhB(OH)}_2$  affords phenylnickel(II) **II**, which will undergo reductive elimination to give imine intermediate **IV**. Finally, the desired product **3a** is formed after hydrolysis of **IV**. Alternatively, intermediate **II** may undergo deborization and isomerization to give intermediate **III**, which goes through reductive elimination to afford the final product **3a**. In addition, Ni(0) is regenerated in the reductive elimination process.

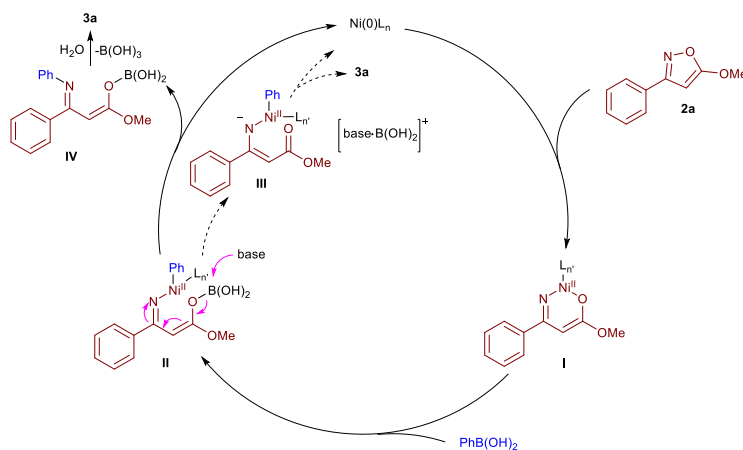

## 4. Synthesis and Characterization of the Corresponding Products



## SUPPORTING INFORMATION

### Methyl (Z)-3-phenyl-3-(phenylamino)acrylate (**3a**)<sup>1</sup>

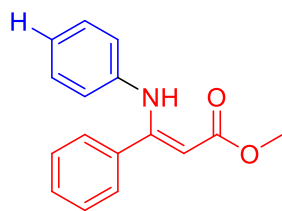

The title compound **3a** was prepared following the **general procedure A** from phenylboronic acid **1a** (0.30 mmol) and 5-methoxy-3-phenylisoxazole **2a** (0.20 mmol) and purified by column chromatography (SiO<sub>2</sub>, PE/EA = 30:1) as a yellow oil (47.1 mg, 93%).

<sup>1</sup>H NMR (400 MHz, CDCl<sub>3</sub>) δ 10.28 (s, 1H), 7.34 (q, *J* = 2.9, 2.4 Hz, 3H), 7.32 – 7.27 (m, 2H), 7.08 (t, *J* = 7.9 Hz, 2H), 6.92 (d, *J* = 7.2 Hz, 1H), 6.69 – 6.65 (m, 2H), 5.00 (s, 1H), 3.75 (s, 3H) ppm.

<sup>13</sup>C NMR (100 MHz, CDCl<sub>3</sub>) δ 170.4, 159.2, 140.3, 135.9, 129.5, 128.6, 128.4, 128.2, 123.0, 122.3, 90.6, 50.7 ppm.

HRMS (ESI) *m/z* calcd. for C<sub>16</sub>H<sub>15</sub>NO<sub>2</sub> [M+H]<sup>+</sup> 254.1176, found 254.1170.

### Methyl (Z)-3-((4-bromophenyl)amino)-3-phenylacrylate (**3b**)<sup>1</sup>

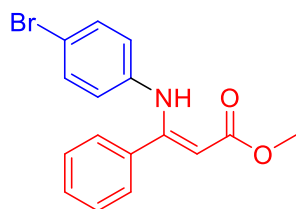

The title compound **3b** was prepared following the **general procedure A** from (4-bromophenyl)boronic acid **1b** (0.30 mmol) and 5-methoxy-3-phenylisoxazole **2a** (0.20 mmol) and purified by column chromatography (SiO<sub>2</sub>, PE/EA = 30:1) as a yellow oil (55.6 mg, 84%).

<sup>1</sup>H NMR (400 MHz, CDCl<sub>3</sub>) δ 10.24 (s, 1H), 7.34 (dd, *J* = 5.7, 1.9 Hz, 2H), 7.32 – 7.28 (m, 3H), 7.18 (d, *J* = 8.8 Hz, 2H), 6.52 (d, *J* = 8.8 Hz, 2H), 5.03 (s, 1H), 3.74 (s, 3H) ppm.

<sup>13</sup>C NMR (100 MHz, CDCl<sub>3</sub>) δ 170.3, 158.6, 139.5, 135.4, 131.6, 129.7, 128.6, 128.1, 123.5, 115.8, 91.6, 50.8 ppm. HRMS (ESI) *m/z* calcd. for C<sub>16</sub>H<sub>14</sub>BrNO<sub>2</sub> [M+H]<sup>+</sup> 332.0281, found 332.0284.

**Methyl (Z)-3-((4-chlorophenyl)amino)-3-phenylacrylate (3c)**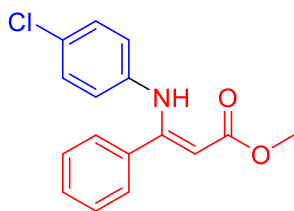

The title compound **3c** was prepared following the **general procedure A** from (4-chlorophenyl)boronic acid **1c** (0.30 mmol) and 5-methoxy-3-phenylisoxazole **2a** (0.20 mmol) and purified by column chromatography (SiO<sub>2</sub>, PE/EA = 30:1) as a yellow oil (48.9 mg, 88%).

<sup>1</sup>H NMR (400 MHz, CDCl<sub>3</sub>) δ 10.25 (s, 1H), 7.34 (dq, *J* = 4.4, 2.0 Hz, 2H), 7.32 – 7.28 (m, 3H), 7.06 – 7.02 (m, 2H), 6.60 – 6.56 (m, 2H), 5.03 (s, 1H), 3.75 (s, 3H) ppm.

<sup>13</sup>C NMR (100 MHz, CDCl<sub>3</sub>) δ 170.4, 158.8, 139.0, 135.5, 129.7, 128.7, 128.6, 128.2, 128.1, 123.3, 91.4, 50.1 ppm.

HRMS (ESI) *m/z* calcd. for C<sub>16</sub>H<sub>14</sub>ClNO<sub>2</sub> [M+H]<sup>+</sup> 288.0786, found 288.0779.

**Methyl (Z)-3-((4-fluorophenyl)amino)-3-phenylacrylate (3d)**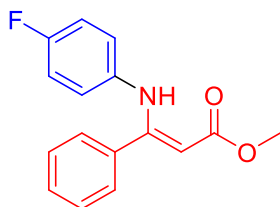

The title compound **3d** was prepared following the **general procedure A** from (4-fluorophenyl)boronic acid **1d** (0.30 mmol) and 5-methoxy-3-phenylisoxazole **2a** (0.20 mmol) and purified by column chromatography (SiO<sub>2</sub>, PE/EA = 30:1) as a yellow oil (46.1 mg, 85%).

<sup>1</sup>H NMR (400 MHz, CDCl<sub>3</sub>) δ 10.22 (s, 1H), 7.34 – 7.30 (m, 2H), 7.30 – 7.27 (m, 3H), 6.78 (t, *J* = 8.6 Hz, 2H), 6.67 – 6.62 (m, 2H), 5.00 (s, 1H), 3.74 (s, 3H) ppm.

<sup>13</sup>C NMR (100 MHz, CDCl<sub>3</sub>) δ 170.5, 159.4, 159.0 (d, *J* = 243.0 Hz), 136.4 (d, *J* = 7.2 Hz), 135.6, 129.5, 128.4, 128.3, 124.1 (d, *J* = 8.0 Hz), 115.4 (d, *J* = 9.2 Hz), 90.4, 50.7 ppm.

<sup>19</sup>F NMR (376 MHz, CDCl<sub>3</sub>) δ -119.7 ppm.

HRMS (ESI) *m/z* calcd. for C<sub>16</sub>H<sub>14</sub>FNO<sub>2</sub> [M+H]<sup>+</sup> 272.1081, found 272.1088.

**(Z)-N-(3-Methoxy-3-oxo-1-phenylprop-1-en-1-yl)-4-(trifluoromethyl)benzenaminium (3e)**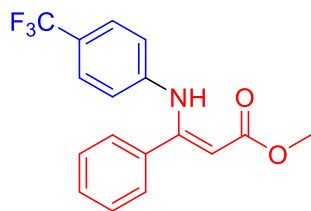

The title compound **3e** was prepared following the **general procedure A** from (4-(trifluoromethyl)phenyl)boronic acid **1e** (0.30 mmol) and 5-methoxy-3-phenylisoxazole **2a** (0.20 mmol) and purified by column chromatography (SiO<sub>2</sub>, PE/EA = 30:1) as a yellow oil (56.5 mg, 88%).

<sup>1</sup>H NMR (400 MHz, CDCl<sub>3</sub>) δ 10.38 (s, 1H), 7.41 – 7.34 (m, 4H), 7.32 (dd, J = 8.3, 1.5 Hz, 3H), 6.68 (d, J = 8.4 Hz, 2H), 5.12 (s, 1H), 3.76 (s, 3H) ppm.

<sup>13</sup>C NMR (100 MHz, CDCl<sub>3</sub>) δ 170.2, 157.9, 143.6, 135.3, 129.9, 128.7, 128.0, 125.8 (q, J = 3.8 Hz), 124.24 (q, J = 32.7 Hz), 124.16 (q, J = 271.3 Hz), 120.9, 93.2, 50.9 ppm.

<sup>19</sup>F NMR (376 MHz, CDCl<sub>3</sub>) δ -61.9 ppm.

HRMS (ESI) m/z calcd. for C<sub>17</sub>H<sub>14</sub>F<sub>3</sub>NO<sub>2</sub> [M+H]<sup>+</sup> 322.1050, found 322.1047.

**(Z)-4-Cyano-N-(3-methoxy-3-oxo-1-phenylprop-1-en-1-yl)benzenaminium (3f)**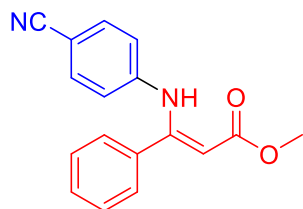

The title compound **3f** was prepared following the **general procedure A** from (4-cyanophenyl)boronic acid **1f** (0.30 mmol) and 5-methoxy-3-phenylisoxazole **2a** (0.20 mmol) and purified by column chromatography (SiO<sub>2</sub>, PE/EA = 30:1) as a yellow oil (45.6 mg, 82%)

<sup>1</sup>H NMR (400 MHz, CDCl<sub>3</sub>) δ 10.39 (s, 1H), 7.45 – 7.40 (m, 1H), 7.36 (s, 2H), 7.35 (d, J = 3.0 Hz, 3H), 7.33 (s, 1H), 6.63 (d, J = 8.5 Hz, 2H), 5.16 (s, 1H), 3.76 (s, 3H) ppm.

<sup>13</sup>C NMR (100 MHz, CDCl<sub>3</sub>) δ 170.0, 157.1, 144.6, 135.0, 132.8, 130.2, 128.9, 127.9, 120.7, 119.0, 105.0, 94.7, 51.1 ppm.

HRMS (ESI) m/z calcd. for C<sub>17</sub>H<sub>14</sub>N<sub>2</sub>O<sub>2</sub> [M+H]<sup>+</sup> 279.1128, found 279.1121.

**(Z)-4-Formyl-N-(3-methoxy-3-oxo-1-phenylprop-1-en-1-yl)benzenaminium (3g)**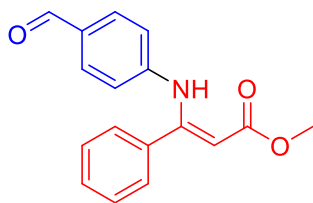

The title compound **3g** was prepared following the **general procedure A** from (4-formylphenyl)boronic acid **1g** (0.30 mmol) and 5-methoxy-3-phenylisoxazole **2a** (0.20 mmol) and purified by column chromatography (SiO<sub>2</sub>, PE/EA = 30:1) as a yellow oil (40.5 mg, 72%).

<sup>1</sup>H NMR (400 MHz, CDCl<sub>3</sub>) δ 10.44 (s, 1H), 9.79 (s, 1H), 7.59 (d, *J* = 8.6 Hz, 2H), 7.42 – 7.36 (m, 2H), 7.35 (d, *J* = 6.5 Hz, 3H), 6.69 (d, *J* = 8.6 Hz, 2H), 5.16 (s, 1H), 3.76 (s, 3H) ppm.

<sup>13</sup>C NMR (100 MHz, CDCl<sub>3</sub>) δ 190.7, 170.0, 157.2, 146.1, 135.3, 130.7, 130.6, 130.1, 128.9, 127.9, 120.5, 94.5, 51.0 ppm.

HRMS (ESI) *m/z* calcd. for C<sub>17</sub>H<sub>15</sub>NO<sub>3</sub> [M+H]<sup>+</sup> 282.1125, found 282.1136.

**(Z)-4-Acetyl-N-(3-methoxy-3-oxo-1-phenylprop-1-en-1-yl)benzenaminium (3h)**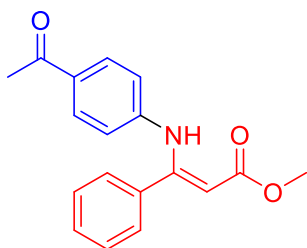

The title compound **3h** was prepared following the **general procedure A** from (4-acetylphenyl)boronic acid **1h** (0.30 mmol) and 5-methoxy-3-phenylisoxazole **2a** (0.20 mmol) and purified by column chromatography (SiO<sub>2</sub>, PE/EA = 30:1) as a yellow oil (49.0 mg, 83%).

<sup>1</sup>H NMR (400 MHz, CDCl<sub>3</sub>) δ 10.40 (s, 1H), 7.68 (d, *J* = 8.7 Hz, 2H), 7.35 (d, *J* = 1.4 Hz, 3H), 7.35 – 7.32 (m, 2H), 6.63 (d, *J* = 8.7 Hz, 2H), 5.12 (s, 1H), 3.76 (s, 3H), 2.47 (s, 3H) ppm.

<sup>13</sup>C NMR (100 MHz, CDCl<sub>3</sub>) δ 196.6, 170.1, 157.6, 144.8, 135.4, 131.2, 129.9, 129.3, 128.8, 127.9, 120.3, 93.7, 50.9, 26.2 ppm.

HRMS (ESI) *m/z* calcd. for C<sub>18</sub>H<sub>17</sub>NO<sub>3</sub> [M+H]<sup>+</sup> 296.1281, found 296.1275.

**(Z)-N-(3-Methoxy-3-oxo-1-phenylprop-1-en-1-yl)-4-(methoxycarbonyl) benzenaminium (3i)**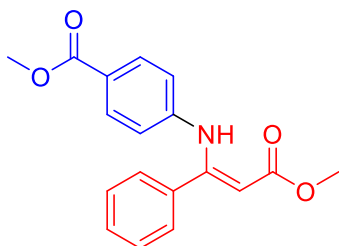

The title compound **3i** was prepared following the **general procedure A** from (4-(methoxycarbonyl)phenyl)boronic acid **1i** (0.30 mmol) and 5-methoxy-3-phenylisoxazole **2a** (0.20 mmol) and purified by column chromatography (SiO<sub>2</sub>, PE/EA = 30:1) as a yellow oil (50.4 mg, 81%).

**<sup>1</sup>H NMR** (400 MHz, CDCl<sub>3</sub>) δ 10.38 (s, 1H), 7.74 (d, *J* = 8.7 Hz, 2H), 7.38 – 7.33 (m, 3H), 7.33 – 7.28 (m, 2H), 6.62 (d, *J* = 8.7 Hz, 2H), 5.10 (s, 1H), 3.82 (s, 3H), 3.75 (s, 3H) ppm.

**<sup>13</sup>C NMR** (100 MHz, CDCl<sub>3</sub>) δ 170.1, 166.6, 157.7, 144.6, 135.4, 130.4, 129.8, 128.7, 127.9, 123.8, 120.4, 93.3, 51.8, 50.8 ppm.

**HRMS** (ESI) *m/z* calcd. for C<sub>18</sub>H<sub>17</sub>NO<sub>4</sub> [M+H]<sup>+</sup> 312.1230, found 312.1228.

**(Z)-4-Isopropoxy-N-(3-methoxy-3-oxo-1-phenylprop-1-en-1-yl)benzenaminium (3j)**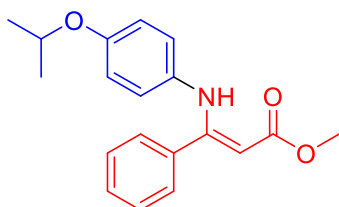

The title compound **3j** was prepared following the **general procedure A** from (4-isopropoxyphenyl)boronic acid **1j** (0.30 mmol) and 5-methoxy-3-phenylisoxazole **2a** (0.20 mmol) and purified by column chromatography (SiO<sub>2</sub>, PE/EA = 30:1) as a yellow oil (54.8 mg, 88%).

**<sup>1</sup>H NMR** (400 MHz, CDCl<sub>3</sub>) δ 10.19 (s, 1H), 7.33 – 7.28 (m, 3H), 7.26 (dd, *J* = 6.4, 1.1 Hz, 2H), 6.61 (s, 4H), 4.93 (s, 1H), 4.37 (h, *J* = 6.1 Hz, 1H), 3.73 (s, 3H), 1.25 (d, *J* = 6.1 Hz, 6H) ppm.

**<sup>13</sup>C NMR** (100 MHz, CDCl<sub>3</sub>) δ 170.6, 160.0, 154.1, 136.0, 133.2, 129.2, 128.3, 128.3, 124.3, 116.0, 88.9, 70.1, 50.6, 22.0 ppm.

**HRMS** (ESI) *m/z* calcd. for C<sub>19</sub>H<sub>21</sub>NO<sub>3</sub> [M+H]<sup>+</sup> 312.1594, found 312.1599.

**(Z)-4-Methoxy-N-(3-methoxy-3-oxo-1-phenylprop-1-en-1-yl)benzenaminium (3k)**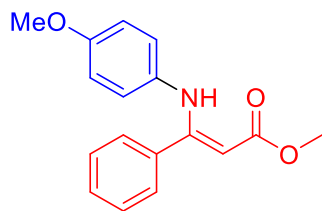

The title compound **3k** was prepared following the **general procedure A** from (4-methoxyphenyl)boronic acid **1k** (0.30 mmol) and 5-methoxy-3-phenylisoxazole **2a** (0.20 mmol) and purified by column chromatography (SiO<sub>2</sub>, PE/EA = 30:1) as a yellow oil (49.3 mg, 87%).

<sup>1</sup>H NMR (400 MHz, CDCl<sub>3</sub>) δ 10.20 (s, 1H), 7.32 – 7.27 (m, 3H), 7.27 – 7.23 (m, 2H), 6.62 (d, *J* = 1.3 Hz, 4H), 4.93 (s, 1H), 3.72 (s, 3H), 3.67 (s, 3H) ppm.

<sup>13</sup>C NMR (100 MHz, CDCl<sub>3</sub>) δ 170.5, 160.0, 155.8, 135.9, 133.3, 129.2, 128.3, 128.2, 124.3, 113.8, 89.0, 55.2, 50.5 ppm.

HRMS (ESI) *m/z* calcd. for C<sub>17</sub>H<sub>17</sub>NO<sub>3</sub> [M+H]<sup>+</sup> 284.1281, found 284.1276.

**(Z)-4-(tert-Butyl)-N-(3-methoxy-3-oxo-1-phenylprop-1-en-1-yl)benzenaminium (3l)**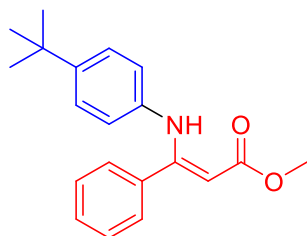

The title compound **3l** was prepared following the **general procedure A** from (4-(tert-butyl)phenyl)boronic acid **1l** (0.30 mmol) and 5-methoxy-3-phenylisoxazole **2a** (0.20 mmol) and purified by column chromatography (SiO<sub>2</sub>, PE/EA = 30:1) as a yellow oil (55.7 mg, 90%).

<sup>1</sup>H NMR (400 MHz, CDCl<sub>3</sub>) δ 10.28 (s, 1H), 7.35 (td, *J* = 7.0, 6.5, 1.5 Hz, 3H), 7.32 – 7.27 (m, 2H), 7.10 (d, *J* = 8.6 Hz, 2H), 6.60 (d, *J* = 8.6 Hz, 2H), 4.97 (s, 1H), 3.74 (s, 3H), 1.23 (s, 9H) ppm.

<sup>13</sup>C NMR (100 MHz, CDCl<sub>3</sub>) δ 170.4, 159.4, 145.9, 137.6, 136.1, 129.4, 128.4, 128.2, 125.5, 121.7, 90.0, 50.6, 34.1, 31.3 ppm.

HRMS (ESI) *m/z* calcd. for C<sub>20</sub>H<sub>23</sub>NO<sub>2</sub> [M+H]<sup>+</sup> 310.1802, found 310.1808.

**(Z)-4-(Diphenylamino)-N-(3-methoxy-3-oxo-1-phenylprop-1-en-1-yl)benzenaminium (3m)**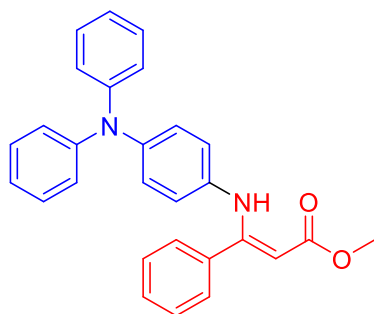

The title compound **3m** was prepared following the **general procedure A** from (4-(diphenylamino)phenyl)boronic acid **1m** (0.30 mmol) and 5-methoxy-3-phenylisoxazole **2a** (0.20 mmol) and purified by column chromatography (SiO<sub>2</sub>, PE/EA = 30:1) as a yellow oil (71.4 mg, 85%).

<sup>1</sup>H NMR (400 MHz, CDCl<sub>3</sub>) δ 10.28 (s, 1H), 7.40 – 7.36 (m, 2H), 7.36 – 7.29 (m, 3H), 7.21 (t, *J* = 7.8 Hz, 4H), 7.02 – 6.95 (m, 6H), 6.85 – 6.80 (m, 2H), 6.60 – 6.54 (m, 2H), 4.99 (d, *J* = 1.8 Hz, 1H), 3.76 (s, 3H) ppm.

<sup>13</sup>C NMR (100 MHz, CDCl<sub>3</sub>) δ 170.5, 159.4, 147.7, 143.2, 136.0, 135.4, 129.4, 129.1, 128.3, 128.2, 124.6, 123.7, 123.2, 122.4, 89.9, 50.6 ppm.

HRMS (ESI) *m/z* calcd. for C<sub>28</sub>H<sub>24</sub>N<sub>2</sub>O<sub>2</sub> [M+H]<sup>+</sup> 421.1902, found 421.1907.

**(Z)-4-(Hydroxymethyl)-N-(3-methoxy-3-oxo-1-phenylprop-1-en-1-yl)benzenaminium (3n)**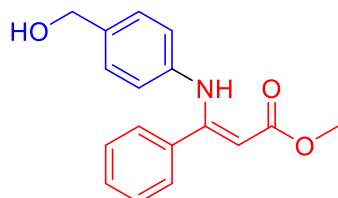

The title compound **3n** was prepared following the **general procedure A** from (4-(hydroxymethyl)phenyl)boronic acid **1n** (0.30 mmol) and 5-methoxy-3-phenylisoxazole **2a** (0.20 mmol) and purified by column chromatography (SiO<sub>2</sub>, PE/EA = 30:1) as a yellow oil (47.0 mg, 83%).

<sup>1</sup>H NMR (400 MHz, CDCl<sub>3</sub>) δ 10.25 (s, 1H), 7.32 (dt, *J* = 8.8, 1.6 Hz, 3H), 7.29 – 7.25 (m, 2H), 7.05 (d, *J* = 8.5 Hz, 2H), 6.62 (d, *J* = 8.5 Hz, 2H), 4.98 (s, 1H), 4.51 (s, 2H), 3.72 (s, 3H) ppm.

<sup>13</sup>C NMR (100 MHz, CDCl<sub>3</sub>) δ 170.4, 159.1, 139.7, 135.8, 135.5, 129.5, 128.5, 128.2, 127.5, 122.2, 90.7, 64.8, 50.7 ppm.

HRMS (ESI) *m/z* calcd. for C<sub>17</sub>H<sub>17</sub>NO<sub>3</sub> [M+H]<sup>+</sup> 284.1281, found 284.1273.

**(Z)-N-(3-Methoxy-3-oxo-1-phenylprop-1-en-1-yl)-2-methylbenzenaminium (3o)**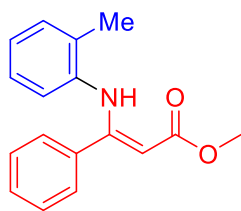

The title compound **3o** was prepared following the **general procedure A** from o-tolylboronic acid **1o** (0.30 mmol) and 5-methoxy-3-phenylisoxazole **2a** (0.20 mmol) and purified by column chromatography (SiO<sub>2</sub>, PE/EA = 30:1) as a yellow oil (26.3 mg, 54%).

<sup>1</sup>H NMR (400 MHz, CDCl<sub>3</sub>) δ 10.13 (s, 1H), 7.29 (dt, *J* = 8.8, 2.2 Hz, 3H), 7.26 – 7.23 (m, 2H), 7.14 – 7.10 (m, 1H), 6.88 – 6.82 (m, 1H), 6.78 (td, *J* = 7.7, 1.6 Hz, 1H), 6.33 (dd, *J* = 8.0, 1.2 Hz, 1H), 5.03 (s, 1H), 3.74 (s, 3H), 2.41 (s, 3H) ppm.

<sup>13</sup>C NMR (100 MHz, CDCl<sub>3</sub>) δ 170.6, 160.0, 138.9, 136.1, 130.4, 130.2, 129.4, 128.3, 128.0, 125.8, 123.9, 123.5, 90.2, 50.7, 18.2 ppm.

HRMS (ESI) *m/z* calcd. for C<sub>17</sub>H<sub>17</sub>NO<sub>2</sub> [M+H]<sup>+</sup> 268.1332, found 268.1326.

**(Z)-N-(3-Methoxy-3-oxo-1-phenylprop-1-en-1-yl)naphthalen-2-aminium (3p)**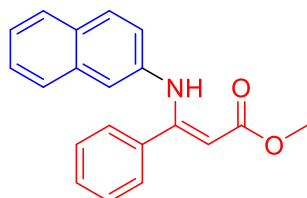

The title compound **3p** was prepared following the **general procedure A** from naphthalen-2-ylboronic acid **1p** (0.30 mmol) and 5-methoxy-3-phenylisoxazole **2a** (0.20 mmol) and purified by column chromatography (SiO<sub>2</sub>, PE/EA = 30:1) as a yellow oil (55.2 mg, 91%).

<sup>1</sup>H NMR (400 MHz, CDCl<sub>3</sub>) δ 10.47 (s, 1H), 7.66 (d, *J* = 7.9 Hz, 1H), 7.53 (d, *J* = 8.8 Hz, 1H), 7.48 (d, *J* = 8.0 Hz, 1H), 7.39 – 7.36 (m, 2H), 7.36 – 7.29 (m, 3H), 7.26 (d, *J* = 7.5 Hz, 2H), 7.02 (d, *J* = 2.3 Hz, 1H), 6.85 (dd, *J* = 8.8, 2.3 Hz, 1H), 5.06 (s, 1H), 3.76 (s, 3H) ppm.

<sup>13</sup>C NMR (100 MHz, CDCl<sub>3</sub>) δ 170.4, 159.0, 137.9, 135.8, 133.6, 129.8, 129.5, 128.5, 128.3, 128.2, 127.5, 127.0, 126.3, 124.6, 122.4, 118.4, 91.0, 50.7 ppm.

HRMS (ESI) *m/z* calcd. for C<sub>20</sub>H<sub>17</sub>NO<sub>2</sub> [M+H]<sup>+</sup> 304.1332, found 304.138.



**(Z)-N-(3-Methoxy-3-oxo-1-phenylprop-1-en-1-yl)-9,9'-spirobi[fluoren]-3-aminium (3q)**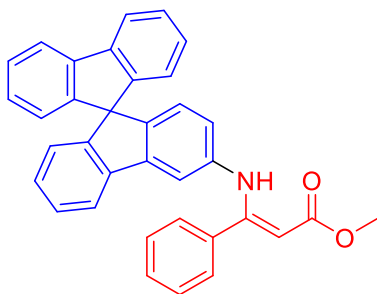

The title compound **3q** was prepared following the **general procedure A** from 9,9'-spirobi[fluoren]-2-ylboronic acid **1q** (0.30 mmol) and 5-methoxy-3-phenylisoxazole **2a** (0.20 mmol) and purified by column chromatography (SiO<sub>2</sub>, PE/EA = 30:1) as a yellow oil (79.6 mg, 81%).

**<sup>1</sup>H NMR** (400 MHz, CDCl<sub>3</sub>) δ 10.21 (s, 1H), 7.76 (d, *J* = 7.6 Hz, 2H), 7.69 (d, *J* = 7.6 Hz, 1H), 7.57 (d, *J* = 8.2 Hz, 1H), 7.36 – 7.29 (m, 3H), 7.12 – 7.01 (m, 8H), 6.75 (dd, *J* = 8.2, 2.2 Hz, 1H), 6.64 (d, *J* = 7.6 Hz, 1H), 6.59 (d, *J* = 7.6 Hz, 2H), 5.82 (d, *J* = 2.1 Hz, 1H), 4.85 (s, 1H), 3.67 (s, 3H) ppm.

**<sup>13</sup>C NMR** (100 MHz, CDCl<sub>3</sub>) δ 170.3, 159.0, 149.5, 148.5, 148.3, 141.5, 141.4, 139.9, 136.7, 135.3, 129.3, 128.0, 127.9, 127.7, 127.7, 127.6, 127.1, 123.9, 123.8, 121.5, 120.0, 119.8, 119.4, 118.1, 90.0, 50.6 ppm.

**HRMS** (ESI) *m/z* calcd. for C<sub>35</sub>H<sub>25</sub>NO<sub>2</sub> [M+H]<sup>+</sup> 492.1958, found 492.1953.

**(Z)-N-(3-Methoxy-3-oxo-1-phenylprop-1-en-1-yl)pyren-1-aminium (3r)**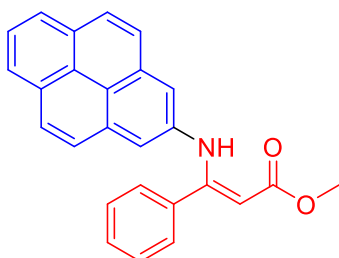

The title compound **3r** was prepared following the **general procedure A** from pyren-1-ylboronic acid **1r** (0.30 mmol) and 5-methoxy-3-phenylisoxazole **2a** (0.20 mmol) and purified by column chromatography (SiO<sub>2</sub>, PE/EA = 30:1) as a yellow oil (51.3 mg, 68%).

**<sup>1</sup>H NMR** (400 MHz, CDCl<sub>3</sub>) δ 11.01 (s, 1H), 8.52 (d, *J* = 9.2 Hz, 1H), 8.20 – 8.13 (m, 3H), 7.99 (t, *J* = 7.7 Hz, 1H), 7.95 (d, *J* = 8.9 Hz, 1H), 7.87 (d, *J* = 8.9 Hz, 1H), 7.76 (d, *J* = 8.2 Hz, 1H), 7.35 – 7.31 (m, 2H), 7.26 – 7.22 (m, 1H), 7.18 – 7.10 (m, 3H), 5.24 (s, 1H), 3.83 (s, 3H) ppm.

## SUPPORTING INFORMATION

$^{13}\text{C}$  NMR (100 MHz,  $\text{CDCl}_3$ )  $\delta$  170.9, 160.5, 136.0, 134.2, 131.4, 131.2, 129.4, 128.4, 128.2, 127.9, 127.8, 127.2, 126.4, 126.2, 125.3, 125.1, 124.9, 124.8, 124.4, 123.1, 121.4, 91.0, 50.9 ppm.

HRMS (ESI)  $m/z$  calcd. for  $\text{C}_{26}\text{H}_{19}\text{NO}_2$   $[\text{M}+\text{H}]^+$  378.1489, found 378.1486.

### (Z)-4-(9H-Carbazol-9-yl)-N-(3-methoxy-3-oxo-1-phenylprop-1-en-1-yl) benzenaminium (3s)

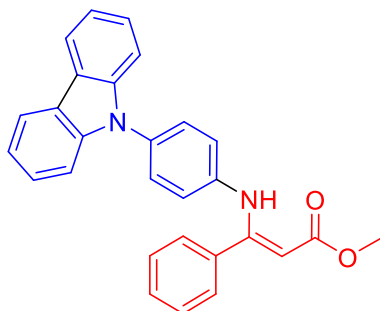

The title compound **3s** was prepared following the **general procedure A** from (4-(9H-carbazol-9-yl)phenyl)boronic acid **1s** (0.30 mmol) and 5-methoxy-3-phenylisoxazole **2a** (0.20 mmol) and purified by column chromatography ( $\text{SiO}_2$ , PE/EA = 30:1) as a yellow oil (51.9 mg, 62%).

$^1\text{H}$  NMR (400 MHz,  $\text{CDCl}_3$ )  $\delta$  10.40 (s, 1H), 8.08 (dt,  $J$  = 7.7, 1.0 Hz, 2H), 7.44 – 7.41 (m, 2H), 7.37 (dd,  $J$  = 2.2, 1.0 Hz, 2H), 7.36 – 7.32 (m, 3H), 7.25 – 7.20 (m, 6H), 6.83 (d,  $J$  = 8.7 Hz, 2H), 5.07 (s, 1H), 3.76 (s, 3H) ppm.

$^{13}\text{C}$  NMR (100 MHz,  $\text{CDCl}_3$ )  $\delta$  170.5, 158.8, 140.9, 139.7, 135.7, 132.3, 129.8, 128.7, 128.3, 127.4, 125.9, 123.2, 123.0, 120.3, 119.8, 109.6, 91.7, 50.9 ppm.

HRMS (ESI)  $m/z$  calcd. for  $\text{C}_{28}\text{H}_{22}\text{N}_2\text{O}_2$   $[\text{M}+\text{H}]^+$  419.1754, found 419.1748.

### (Z)-N-(3-Methoxy-3-oxo-1-phenylprop-1-en-1-yl)-1-methyl-1H-indol-5-aminium (3t)

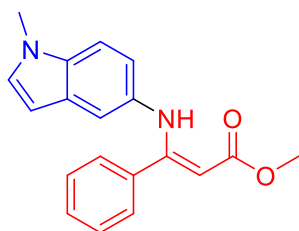

The title compound **3t** was prepared following the **general procedure A** from (1-methyl-1H-indol-5-yl)boronic acid **1t** (0.30 mmol) and 5-methoxy-3-phenylisoxazole **2a** (0.20 mmol) and purified by column chromatography ( $\text{SiO}_2$ , PE/EA = 30:1) as a yellow oil (53.3 mg, 87%).

## SUPPORTING INFORMATION

**<sup>1</sup>H NMR** (400 MHz, CDCl<sub>3</sub>) δ 10.36 (s, 1H), 7.36 – 7.32 (m, 2H), 7.26 – 7.17 (m, 3H), 7.02 – 6.99 (m, 2H), 6.95 (d, *J* = 3.1 Hz, 1H), 6.64 (dd, *J* = 8.8, 2.1 Hz, 1H), 6.27 (dd, *J* = 3.1, 0.8 Hz, 1H), 4.94 (s, 1H), 3.74 (s, 3H), 3.67 (s, 3H) ppm.

**<sup>13</sup>C NMR** (100 MHz, CDCl<sub>3</sub>) δ 170.7, 160.7, 136.3, 133.8, 132.6, 129.5, 129.0, 128.4, 128.3, 128.1, 118.9, 115.4, 109.0, 100.7, 88.1, 50.5, 32.8 ppm.

**HRMS** (ESI) *m/z* calcd. for C<sub>19</sub>H<sub>18</sub>N<sub>2</sub>O<sub>2</sub> [M+H]<sup>+</sup> 307.1441, found 370.1436.

### (Z)-6-Chloro-N-(3-methoxy-3-oxo-1-phenylprop-1-en-1-yl)pyridin-3-aminium (3u)

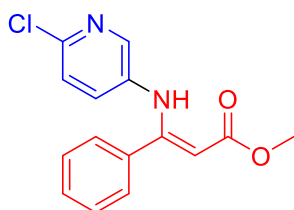

The title compound **3u** was prepared following the **general procedure A** from (6-chloropyridin-3-yl)boronic acid **1u** (0.30 mmol) and 5-methoxy-3-phenylisoxazole **2a** (0.20 mmol) and purified by column chromatography (SiO<sub>2</sub>, PE/EA = 30:1) as a yellow oil (49.0 mg, 85%).

**<sup>1</sup>H NMR** (400 MHz, CDCl<sub>3</sub>) δ 10.27 (s, 1H), 7.81 (d, *J* = 2.9 Hz, 1H), 7.40 – 7.36 (m, 1H), 7.34 – 7.29 (m, 4H), 6.99 (d, *J* = 8.6 Hz, 1H), 6.81 (dd, *J* = 8.6, 2.9 Hz, 1H), 5.12 (s, 1H), 3.75 (s, 3H) ppm.

**<sup>13</sup>C NMR** (100 MHz, CDCl<sub>3</sub>) δ 170.3, 157.9, 144.7, 142.6, 136.3, 134.6, 131.3, 130.1, 128.9, 128.0, 123.6, 93.2, 51.0 ppm.

**HRMS** (ESI) *m/z* calcd. for C<sub>15</sub>H<sub>13</sub>ClN<sub>2</sub>O<sub>2</sub> [M+H]<sup>+</sup> 289.0738, found 289.0732.

### (Z)-N-(3-Methoxy-3-oxo-1-phenylprop-1-en-1-yl)thiophen-3-aminium (3v)

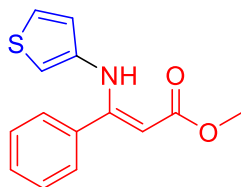

The title compound **3v** was prepared following the **general procedure A** from thiophen-3-ylboronic acid **1v** (0.30 mmol) and 5-methoxy-3-phenylisoxazole **2a** (0.20 mmol) and purified by column chromatography (SiO<sub>2</sub>, PE/EA = 30:1) as a yellow oil (45.6 mg, 88%).

## SUPPORTING INFORMATION

**<sup>1</sup>H NMR** (400 MHz, CDCl<sub>3</sub>) δ 10.33 (s, 1H), 7.40 – 7.35 (m, 3H), 7.35 – 7.29 (m, 2H), 7.02 (dd, *J* = 5.2, 3.2 Hz, 1H), 6.48 (dd, *J* = 5.1, 1.5 Hz, 1H), 6.05 (dd, *J* = 3.4, 1.4 Hz, 1H), 4.93 (s, 1H), 3.74 (s, 3H) ppm.

**<sup>13</sup>C NMR** (100 MHz, CDCl<sub>3</sub>) δ 170.5, 159.8, 139.0, 135.8, 129.6, 128.4, 128.2, 124.3, 123.5, 110.2, 89.3, 50.7 ppm.

**HRMS** (ESI) *m/z* calcd. for C<sub>14</sub>H<sub>13</sub>NO<sub>2</sub>S [M+H]<sup>+</sup> 260.0738, found 260.0733.

### (Z)-N-(3-Methoxy-3-oxo-1-phenylprop-1-en-1-yl)benzo[*b*]thiophen-2-aminium (3w)

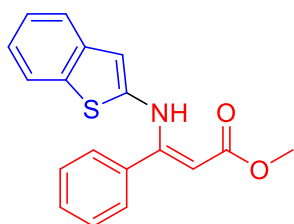

The title compound **3w** was prepared following the **general procedure A** from benzo[*b*]thiophen-2-ylboronic acid **1w** (0.30 mmol) and 5-methoxy-3-phenylisoxazole **2a** (0.20 mmol) and purified by column chromatography (SiO<sub>2</sub>, PE/EA = 30:1) as a yellow oil (30.3 mg, 49%).

**<sup>1</sup>H NMR** (400 MHz, CDCl<sub>3</sub>) δ 10.64 (s, 1H), 7.51 (ddt, *J* = 8.0, 1.3, 0.7 Hz, 1H), 7.46 – 7.43 (m, 3H), 7.42 – 7.38 (m, 1H), 7.36 – 7.32 (m, 2H), 7.23 – 7.19 (m, 1H), 7.14 (ddd, *J* = 8.3, 7.2, 1.3 Hz, 1H), 6.39 (t, *J* = 0.8 Hz, 1H), 5.06 (s, 1H), 3.76 (s, 3H) ppm.

**<sup>13</sup>C NMR** (100 MHz, CDCl<sub>3</sub>) δ 170.3, 159.0, 143.8, 138.4, 135.7, 134.7, 130.0, 128.5, 124.4, 123.1, 122.3, 121.7, 112.3, 91.6, 50.9 ppm.

**HRMS** (ESI) *m/z* calcd. for C<sub>18</sub>H<sub>15</sub>NO<sub>2</sub>S [M+H]<sup>+</sup> 310.0896, found 310.0891.

### (Z)-N-(3-Methoxy-3-oxo-1-phenylprop-1-en-1-yl)dibenzo[*b,d*]thiophen-2-aminium (3x)

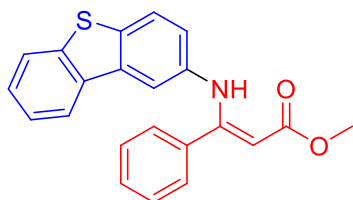

The title compound **3x** was prepared following the **general procedure A** from dibenzo[*b,d*]thiophen-2-ylboronic acid **1x** (0.30 mmol) and 5-methoxy-3-phenylisoxazole **2a** (0.20 mmol) and purified by column chromatography (SiO<sub>2</sub>, PE/EA = 30:1) as a yellow oil (59.6 mg, 83%).

## SUPPORTING INFORMATION

**<sup>1</sup>H NMR** (400 MHz, CDCl<sub>3</sub>) δ 10.52 (s, 1H), 7.79 (d, *J* = 7.1 Hz, 2H), 7.53 (d, *J* = 8.6 Hz, 1H), 7.44 – 7.40 (m, 3H), 7.40 – 7.38 (m, 2H), 7.31 (ddd, *J* = 14.3, 7.8, 6.1 Hz, 3H), 6.82 (dd, *J* = 8.5, 2.2 Hz, 1H), 5.09 (s, 1H), 3.79 (s, 3H) ppm.

**<sup>13</sup>C NMR** (100 MHz, CDCl<sub>3</sub>) δ 170.5, 159.3, 140.1, 137.4, 135.9, 135.8, 135.1, 133.9, 129.5, 128.5, 128.3, 126.8, 124.3, 122.8, 122.6, 122.2, 121.3, 114.9, 90.5, 50.7 ppm.

**HRMS** (ESI) *m/z* calcd. for C<sub>22</sub>H<sub>17</sub>NO<sub>2</sub>S [M+H]<sup>+</sup> 360.1053, found 360.1044.

### Methyl (Z)-3-(dibenzo[*b,d*]thiophen-4-ylamino)-3-phenylacrylate (**3y**)

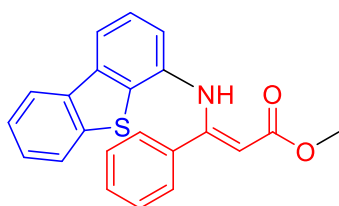

The title compound **3y** was prepared following the **general procedure A** from dibenzo[*b,d*]thiophen-4-ylboronic acid **1y** (0.30 mmol) and 5-methoxy-3-phenylisoxazole **2a** (0.20 mmol) and purified by column chromatography (SiO<sub>2</sub>, PE/EA = 30:1) as a yellow oil (61.0 mg, 85%).

**<sup>1</sup>H NMR** (400 MHz, CDCl<sub>3</sub>) δ 10.39 (s, 1H), 8.11 (dd, *J* = 7.1, 2.1 Hz, 1H), 7.93 – 7.89 (m, 1H), 7.78 (d, *J* = 7.8 Hz, 1H), 7.50 – 7.45 (m, 2H), 7.38 – 7.35 (m, 2H), 7.30 (d, *J* = 7.3 Hz, 1H), 7.26 – 7.21 (m, 2H), 7.08 (t, *J* = 7.8 Hz, 1H), 6.46 (d, *J* = 7.8 Hz, 1H), 5.19 (s, 1H), 3.80 (s, 3H) ppm.

**<sup>13</sup>C NMR** (100 MHz, CDCl<sub>3</sub>) δ 170.5, 159.6, 139.1, 136.7, 136.1, 135.8, 135.6, 133.8, 129.7, 128.4, 127.9, 126.9, 124.7, 124.6, 123.0, 121.9, 121.5, 117.0, 91.9, 50.9 ppm.

**HRMS** (ESI) *m/z* calcd. for C<sub>22</sub>H<sub>17</sub>NO<sub>2</sub>S [M+H]<sup>+</sup> 360.1053, found 360.1048.

### (Z)-3-Methoxy-3-oxo-1-phenyl-N-((E)-styryl)prop-1-en-1-aminium (**3z**)

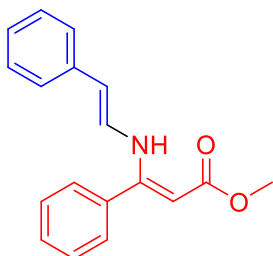

## SUPPORTING INFORMATION

The title compound **3z** was prepared following the **general procedure A** from (E)-styrylboronic acid **1z** (0.30 mmol) and 5-methoxy-3-phenylisoxazole **2a** (0.20 mmol) and purified by column chromatography (SiO<sub>2</sub>, PE/EA = 30:1) as a yellow oil (35.2 mg, 63%).

<sup>1</sup>H NMR (400 MHz, CDCl<sub>3</sub>) δ 10.63 (d, *J* = 11.5 Hz, 1H), 7.48 – 7.42 (m, 6H), 7.22 – 7.17 (m, 2H), 7.10 – 7.06 (m, 2H), 6.80 (dd, *J* = 14.0, 11.4 Hz, 1H), 6.08 (d, *J* = 14.0 Hz, 1H), 4.83 (s, 1H), 3.74 (s, 3H) ppm.

<sup>13</sup>C NMR (100 MHz, CDCl<sub>3</sub>) δ 170.3, 158.5, 136.7, 134.8, 129.9, 128.7, 128.5, 128.4, 126.8, 125.8, 125.0, 110.5, 88.3, 50.7 ppm.

HRMS (ESI) *m/z* calcd. for C<sub>18</sub>H<sub>17</sub>NO<sub>2</sub> [M+H]<sup>+</sup> 280.1332, found 280.1127.

### Methyl (Z)-2-methyl-3-phenyl-3-(phenylamino)acrylate (**3aa**)

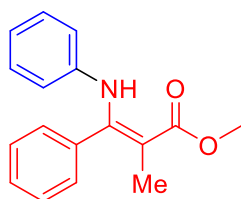

The title compound **3aa** was prepared following the **general procedure A** from phenylboronic acid **1a** (0.30 mmol) and 5-methoxy-4-methyl-3-phenylisoxazole **2b** (0.20 mmol) and purified by column chromatography (SiO<sub>2</sub>, PE/EA = 30:1) as a yellow oil (45.9 mg, 86%).

<sup>1</sup>H NMR (400 MHz, CDCl<sub>3</sub>) δ 10.90 (s, 1H), 7.33 (dd, *J* = 4.9, 2.0 Hz, 3H), 7.24 (dd, *J* = 6.7, 3.0 Hz, 2H), 6.99 (dd, *J* = 8.5, 7.3 Hz, 2H), 6.81 (t, *J* = 7.4 Hz, 1H), 6.55 – 6.51 (m, 2H), 3.79 (s, 3H), 1.68 (s, 3H) ppm.

<sup>13</sup>C NMR (100 MHz, CDCl<sub>3</sub>) δ 171.8, 156.3, 140.9, 135.4, 129.4, 128.6, 128.4, 128.4, 122.2, 121.7, 94.1, 51.1, 14.1 ppm.

HRMS (ESI) *m/z* calcd. for C<sub>17</sub>H<sub>17</sub>NO<sub>2</sub> [M+H]<sup>+</sup> 268.1332, found 268.1336.

### Methyl (E)-2-bromo-3-phenyl-3-(phenylamino)acrylate (**3ab**)

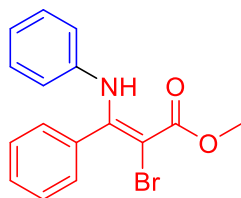

The title compound **3ab** was prepared following the **general procedure A** from phenylboronic acid **1a** (0.30 mmol) and 4-bromo-5-methoxy-3-phenylisoxazole **2c** (0.20 mmol) and purified by column chromatography (SiO<sub>2</sub>, PE/EA = 30:1) as a yellow oil (54.3 mg, 82%).

## SUPPORTING INFORMATION

**<sup>1</sup>H NMR** (400 MHz, CDCl<sub>3</sub>) δ 11.08 (s, 1H), 7.35 – 7.32 (m, 3H), 7.32 – 7.23 (m, 2H), 7.03 (t, *J* = 7.8 Hz, 2H), 6.90 (t, *J* = 7.4 Hz, 1H), 6.60 (d, *J* = 8.0 Hz, 2H), 3.84 (s, 3H) ppm.

**<sup>13</sup>C NMR** (100 MHz, CDCl<sub>3</sub>) δ 168.2, 159.1, 139.6, 135.3, 129.4, 129.2, 128.6, 128.3, 123.9, 122.8, 81.7, 52.3 ppm.

**HRMS** (ESI) *m/z* calcd. for C<sub>16</sub>H<sub>14</sub>BrNO<sub>2</sub> [M+H]<sup>+</sup> 332.0281, found 332.0275.

### Methyl (Z)-3-(4-methoxyphenyl)-3-(phenylamino)acrylate (3ac)

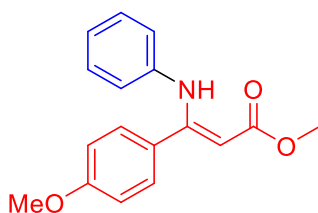

The title compound **3ac** was prepared following the **general procedure A** from phenylboronic acid **1a** (0.30 mmol) and 5-methoxy-3-(4-methoxyphenyl)isoxazole **2d** (0.20 mmol) and purified by column chromatography (SiO<sub>2</sub>, PE/EA = 30:1) as a yellow oil (44.7mg, 79%).

**<sup>1</sup>H NMR** (400 MHz, CDCl<sub>3</sub>) δ 10.23 (s, 1H), 7.28 (d, *J* = 8.8 Hz, 2H), 7.12 – 7.07 (m, 2H), 6.94 – 6.90 (m, 1H), 6.80 (d, *J* = 8.8 Hz, 2H), 6.70 – 6.67 (m, 2H), 4.97 (s, 1H), 3.80 (s, 3H), 3.74 (s, 3H) ppm.

**<sup>13</sup>C NMR** (100 MHz, CDCl<sub>3</sub>) δ 170.5, 160.6, 159.0, 140.6, 129.7, 128.6, 128.0, 122.9, 122.3, 113.8, 90.0, 55.3, 50.6 ppm.

**HRMS** (ESI) *m/z* calcd. for C<sub>17</sub>H<sub>17</sub>NO<sub>3</sub> [M+H]<sup>+</sup> 284.1281, found 284.1276.

### Benzyl (Z)-3-phenyl-3-(phenylamino)acrylate (3ad)

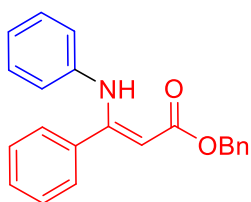

The title compound **3ad** was prepared following the **general procedure A** from phenylboronic acid **1a** (0.30 mmol) and 5-(benzyloxy)-3-phenylisoxazole **2f** (0.20 mmol) and purified by column chromatography (SiO<sub>2</sub>, PE/EA = 30:1) as a yellow oil (48.1 mg, 73%).

## SUPPORTING INFORMATION

**<sup>1</sup>H NMR** (400 MHz, CDCl<sub>3</sub>) δ 10.29 (s, 1H), 7.43 – 7.40 (m, 2H), 7.40 – 7.36 (m, 2H), 7.36 – 7.32 (m, 4H), 7.30 – 7.27 (m, 2H), 7.08 (dd, *J* = 8.5, 7.3 Hz, 2H), 6.94 – 6.89 (m, 1H), 6.67 (d, *J* = 7.3 Hz, 2H), 5.21 (s, 2H), 5.07 (s, 1H) ppm.

**<sup>13</sup>C NMR** (100 MHz, CDCl<sub>3</sub>) δ 169.8, 159.6, 140.3, 136.9, 135.9, 129.5, 128.6, 128.6, 128.4, 128.3, 128.0, 128.0, 123.1, 122.4, 90.7, 65.2 ppm.

**HRMS** (ESI) *m/z* calcd. for C<sub>22</sub>H<sub>19</sub>NO<sub>2</sub> [M+H]<sup>+</sup> 330.1489, found 330.1484.

### Phenyl (Z)-3-phenyl-3-(phenylamino)acrylate (**3ae**)

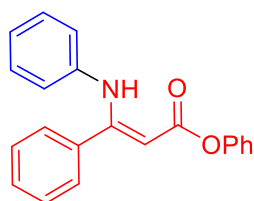

The title compound **3ae** was prepared following the **general procedure A** from phenylboronic acid **1a** (0.30 mmol) and 5-phenoxy-3-phenylisoxazole **2g** (0.20 mmol) and purified by column chromatography (SiO<sub>2</sub>, PE/EA = 30:1) as a yellow oil (43.5 mg, 69%).

**<sup>1</sup>H NMR** (400 MHz, CDCl<sub>3</sub>) δ 10.36 (s, 1H), 7.39 – 7.36 (m, 4H), 7.33 – 7.29 (m, 2H), 7.26 – 7.21 (m, 2H), 7.18 – 7.15 (m, 2H), 7.09 – 7.04 (m, 2H), 6.95 – 6.90 (m, 1H), 6.68 – 6.65 (m, 2H), 5.20 (s, 1H) ppm.

**<sup>13</sup>C NMR** (100 MHz, CDCl<sub>3</sub>) δ 168.6, 161.0, 150.9, 139.8, 135.6, 129.3, 128.6, 128.5, 128.2, 123.5, 122.4, 122.0, 119.1, 89.4, 79.5 ppm.

**HRMS** (ESI) *m/z* calcd. for C<sub>21</sub>H<sub>17</sub>NO [M+H]<sup>+</sup> 316.1332, found 316.1334.

### 4-Methoxyphenyl (Z)-3-phenyl-3-(phenylamino)acrylate (**3af**)

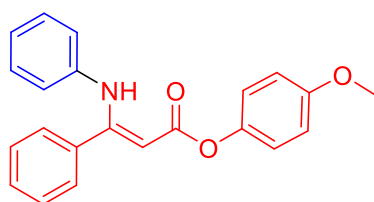

The title compound **3af** was prepared following the **general procedure A** from phenylboronic acid **1a** (0.30 mmol) and 5-(4-methoxyphenoxy)-3-phenylisoxazole **2h** (0.20 mmol) and purified by column chromatography (SiO<sub>2</sub>, PE/EA = 30:1) as a yellow oil (48.4 mg, 70%).

**<sup>1</sup>H NMR** (400 MHz, CDCl<sub>3</sub>) δ 10.36 (s, 1H), 7.38 (td, *J* = 6.1, 1.6 Hz, 3H), 7.34 – 7.30 (m, 2H), 7.09 (d, *J* = 4.6 Hz, 2H), 7.07 (t, *J* = 3.3 Hz, 2H), 6.92 (d, *J* = 8.9 Hz, 3H), 6.68 – 6.65 (m, 2H), 5.19 (s, 1H), 3.81 (s, 3H) ppm.



## SUPPORTING INFORMATION

$^{13}\text{C}$  NMR (100 MHz,  $\text{CDCl}_3$ )  $\delta$  169.1, 160.9, 157.0, 144.4, 139.9, 135.6, 129.7, 128.7, 128.5, 128.3, 123.4, 122.7, 122.4, 114.4, 89.4, 55.6 ppm.

HRMS (ESI)  $m/z$  calcd. for  $\text{C}_{22}\text{H}_{19}\text{NO}_3$   $[\text{M}+\text{H}]^+$  346.1438, found 346.1433.

### Methyl 5-methyl-1,2-diphenyl-1H-pyrrole-3-carboxylate (**4**)<sup>2</sup>

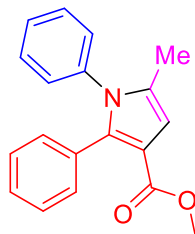

Methyl (Z)-3-phenyl-3-(phenylamino)acrylate **3a** (0.2 mmol) was stirred in MeCN (2.0 mL) together with  $\text{Ag}_2\text{CO}_3$  (0.6 mmol) at 110 °C under an atmosphere of argon. After completion of the reaction (as indicated by TLC), the reaction mixture was cooled to room temperature, diluted with EtOAc (6 mL), and filtered through a short pad of silica, which was then washed with EtOAc (6 mL). Removal of the solvent in vacuo and purification of the residue by column chromatography using a mixture of PE and EtOAc as eluent provided methyl 5-methyl-1,2-diphenyl-1H-pyrrole-3-carboxylate **4** as a yellow oil (39.2 mg, 68%).

$^1\text{H}$  NMR (400 MHz,  $\text{CDCl}_3$ )  $\delta$  7.28 – 7.23 (m, 3H), 7.18 – 7.14 (m, 5H), 7.05 – 7.02 (m, 2H), 6.53 (d,  $J = 1.2$  Hz, 1H), 3.69 (s, 3H), 2.08 (s, 3H) ppm.

$^{13}\text{C}$  NMR (100 MHz,  $\text{CDCl}_3$ )  $\delta$  165.3, 138.7, 137.9, 131.8, 131.1, 130.3, 128.8, 128.5, 127.9, 127.5, 127.3, 112.6, 108.7, 50.9, 13.0 ppm.

HRMS (ESI)  $m/z$  calcd. for  $\text{C}_{19}\text{H}_{17}\text{NO}_2$   $[\text{M}+\text{H}]^+$  291.1260, found 291.1253.

### Methyl 3-methyl-1,5-diphenyl-1H-pyrazole-4-carboxylate (**5**)<sup>3</sup>

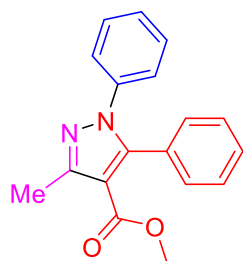

To an oven-dried screw-capped vial (20 mL) with a magnetic stirring bar were weighed in air methyl (Z)-3-phenyl-3-(phenylamino)acrylate **3a** (0.2 mmol) and  $\text{Cu}(\text{OAc})_2$  (0.3 mmol) before adding the liquid acetonitrile (6.0 mmol) as a reaction partner. The screw-capped vial was closed and the reaction mixture was

## SUPPORTING INFORMATION

stirred vigorously at room temperature to suspend the solids well. The reaction vial was placed into a preheated metal block (110 °C) and the reaction mixture was stirred at this temperature for 24 h. After cooling to room temperature, the reaction mixture was analyzed by TLC. EtOAc (3 mL) was added and the mixture was shortly stirred at room temperature to suspend the metallic precipitates and filtered through a short pad of silica. The solid was washed thoroughly with EtOAc (4 x 3 mL) and the combined filtrates were concentrated in vacuo. The crude product was dissolved in CH<sub>2</sub>Cl<sub>2</sub> (ca. 5 mL), adsorbed on silica (ca. 2 g) and purified by flash column chromatography (silica, gradient of PE/EtOAc-mixtures = 10:1) to give compound **5** as a yellow oil (42.2 mg, 72%).

**<sup>1</sup>H NMR** (400 MHz, CDCl<sub>3</sub>) δ 7.36 – 7.29 (m, 3H), 7.26 – 7.22 (m, 5H), 7.19 – 7.14 (m, 2H), 3.69 (s, 3H), 2.59 (s, 3H) ppm.

**<sup>13</sup>C NMR** (100 MHz, CDCl<sub>3</sub>) δ 164.3, 151.7, 146.4, 139.1, 130.3, 128.9, 128.7, 127.9, 127.6, 125.3, 111.6, 51.0, 14.3 ppm.

**HRMS** (ESI) *m/z* calcd. for C<sub>18</sub>H<sub>16</sub>N<sub>2</sub>O<sub>2</sub> [M+H]<sup>+</sup> 293.1285, found 293.1289.

### Methyl 2-phenyl-1H-indole-3-carboxylate (**6**)<sup>4</sup>

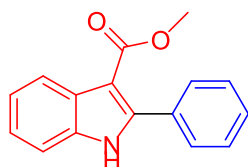

Methyl (Z)-3-phenyl-3-(phenylamino)acrylate **3a** (0.2 mmol) was stirred in DMF (1.0 mL) together with Pd(OAc)<sub>2</sub> (10 mol%), Cu(OAc)<sub>2</sub> (0.6 mmol), and K<sub>2</sub>CO<sub>3</sub> (0.6 mmol) at 80 °C under an atmosphere of argon. After completion of the reaction (as indicated by TLC), the reaction mixture was cooled to room temperature, diluted with EtOAc (3 mL), and filtered through a short pad of silica, which was then washed with EtOAc (6 mL). Removal of the solvent in vacuo and purification of the residue by column chromatography using a mixture of PE and EtOAc as eluent provided 3-(Methoxycarbonyl)-2-phenyl-1H-indol-1-ium **8** as a yellow oil (22.5 mg, 45%).

**<sup>1</sup>H NMR** (400 MHz, CDCl<sub>3</sub>) δ 8.51 (s, 1H), 8.16 – 8.11 (m, 1H), 7.58 (dd, *J* = 7.4, 2.4 Hz, 2H), 7.38 (dd, *J* = 5.1, 2.1 Hz, 3H), 7.30 (d, *J* = 0.8 Hz, 1H), 7.23 – 7.18 (m, 2H), 3.76 (s, 3H) ppm.

**<sup>13</sup>C NMR** (100 MHz, CDCl<sub>3</sub>) δ 165.8, 144.5, 135.1, 132.0, 129.5, 129.2, 128.2, 127.5, 123.3, 122.2, 122.1, 111.0, 104.5, 50.ppm.

HRMS (ESI)  $m/z$  calcd. for  $C_{16}H_{13}NO_2$   $[M+H]^+$  252.1019, found 252.1017.

### 3-(Methoxycarbonyl)-2-phenylquinolin-1-ium (7)

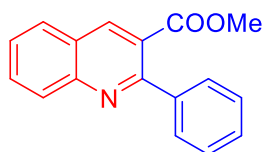

The title compound **7** was prepared following the **general procedure A** from (2-formylphenyl)boronic acid **4** (0.30 mmol) and 5-methoxy-3-phenylisoxazole **2a** (0.20 mmol) and purified by column chromatography ( $SiO_2$ , PE/EA = 30:1) as a yellow oil (25.8 mg, 49%).

$^1H$  NMR (400 MHz,  $CDCl_3$ )  $\delta$  8.66 (d,  $J = 0.9$  Hz, 1H), 8.19 (dq,  $J = 8.5, 0.9$  Hz, 1H), 7.92 (dd,  $J = 8.1, 1.4$  Hz, 1H), 7.82 (ddd,  $J = 8.5, 6.9, 1.5$  Hz, 1H), 7.66 – 7.63 (m, 2H), 7.52 – 7.41 (m, 4H), 3.76 – 3.73 (m, 3H) ppm.

$^{13}C$  NMR (100 MHz,  $CDCl_3$ )  $\delta$  168.3, 158.0, 148.4, 140.5, 139.2, 131.6, 129.5, 128.6, 128.5, 128.2, 127.2, 126.1, 125.8, 125.0, 52.4 ppm.

HRMS (ESI)  $m/z$  calcd. for  $C_{17}H_{13}NO_2$   $[M+H]^+$  264.1019, found 264.1024.

## 5. References

- (a) X. Xu, X. Zhang, Z. Wang and M. Kong, *RSC Adv.*, 2015, **5**, 40950–40952. (b) X. Zhang, B. Yang, G. Li, X. Shu, D. Mungra and J. Zhu, *Synlett*, 2012, **23**, 622–626.
- M. Zhao, F. Wang and X. Li, *Org. Lett.*, 2012, **14**, 1412–1415.
- J. J. Neumann, M. Suri and F. Glorius, *Angew. Chem. Int. Ed.*, 2010, **49**, 7790–7794.
- X. Ji, H. Huang, W. Wu, X. Li and H. Jiang, *J. Org. Chem.*, 2013, **78**, 11155–11162.

# SUPPORTING INFORMATION

## 6. NMR Spectra

### Methyl (Z)-3-phenyl-3-(phenylamino)acrylate (**3a**)

$^1\text{H}$  NMR (400 MHz,  $\text{CDCl}_3$ )

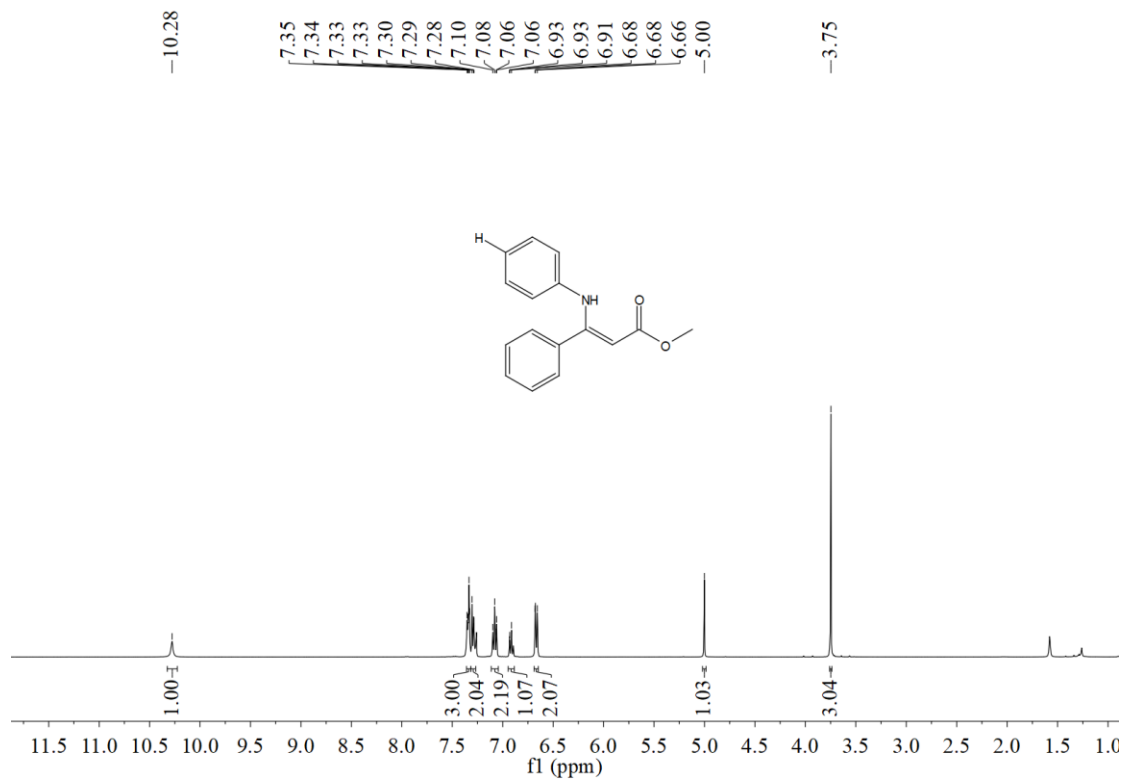

$^{13}\text{C}$  NMR (100 MHz,  $\text{CDCl}_3$ )

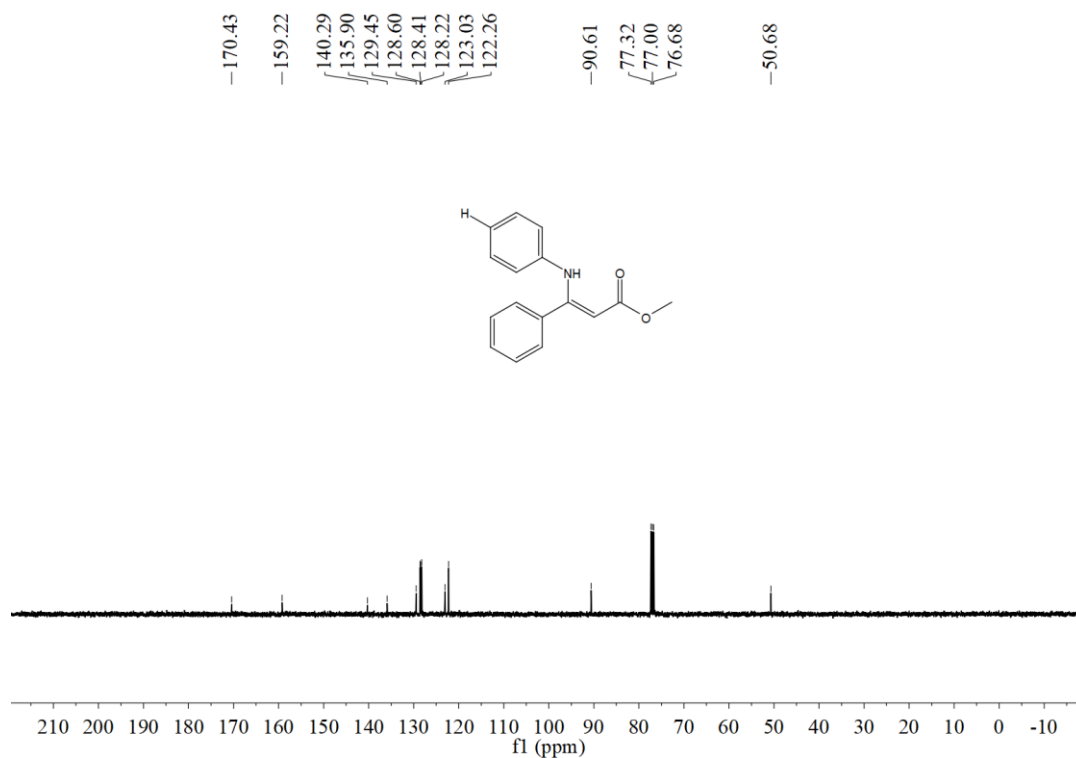

# SUPPORTING INFORMATION

## Methyl (Z)-3-((4-bromophenyl)amino)-3-phenylacrylate (**3b**)

$^1\text{H NMR}$  (400 MHz,  $\text{CDCl}_3$ )

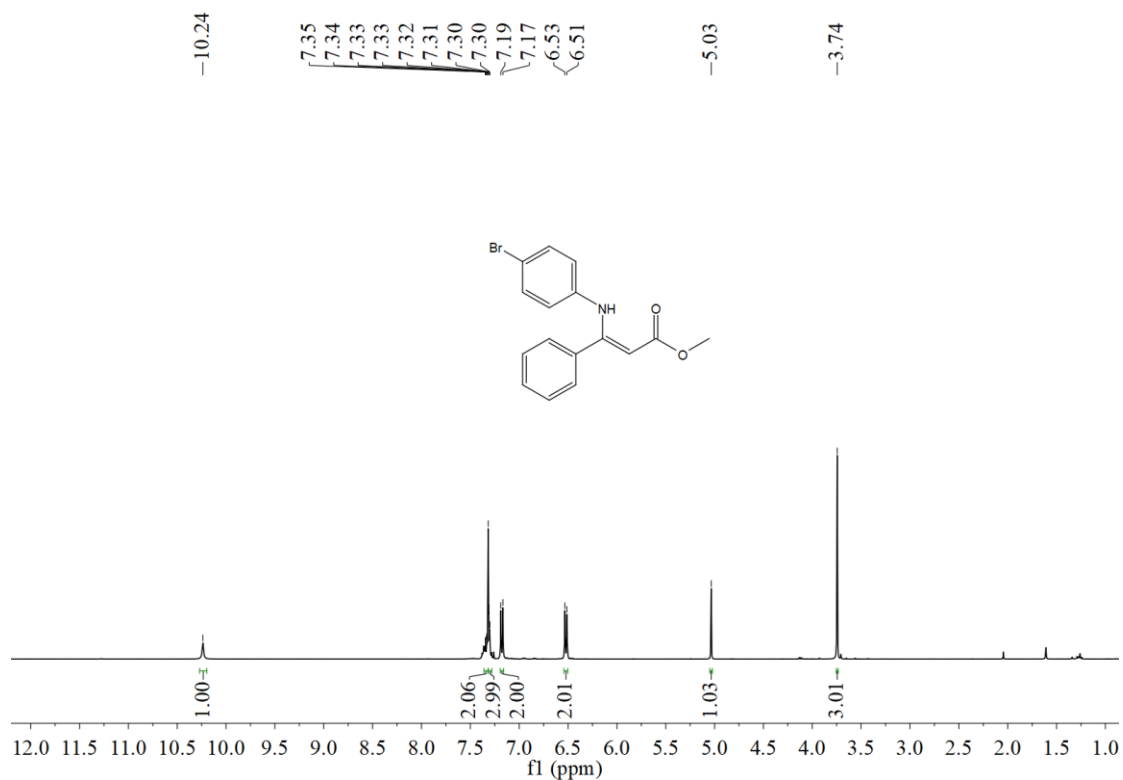

$^{13}\text{C NMR}$  (100 MHz,  $\text{CDCl}_3$ )

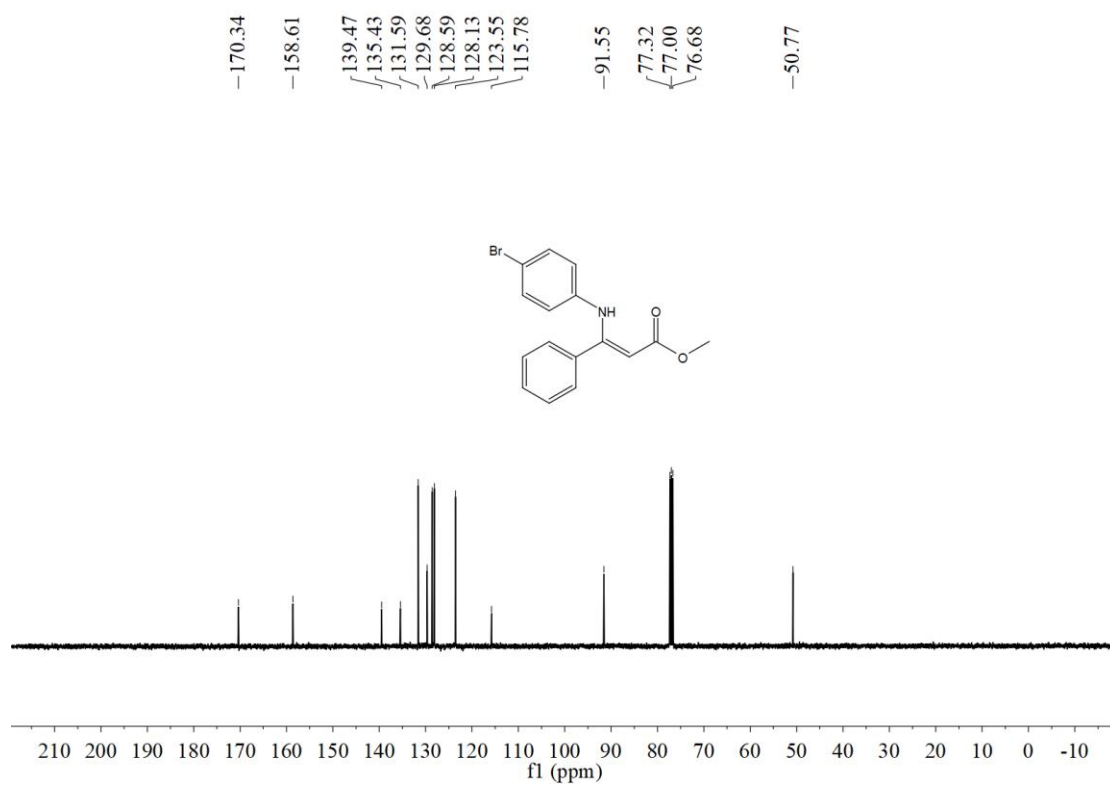

# SUPPORTING INFORMATION

## Methyl (Z)-3-((4-chlorophenyl)amino)-3-phenylacrylate (**3c**)

$^1\text{H NMR}$  (400 MHz,  $\text{CDCl}_3$ )

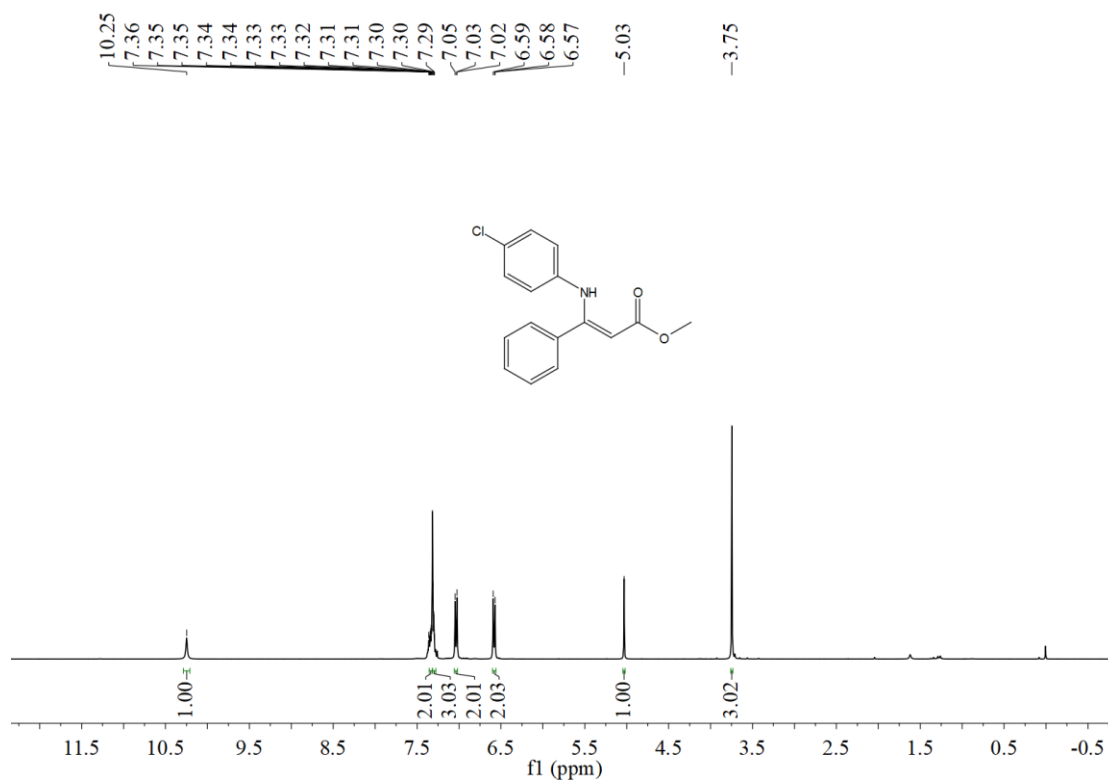

$^{13}\text{C NMR}$  (100 MHz,  $\text{CDCl}_3$ )

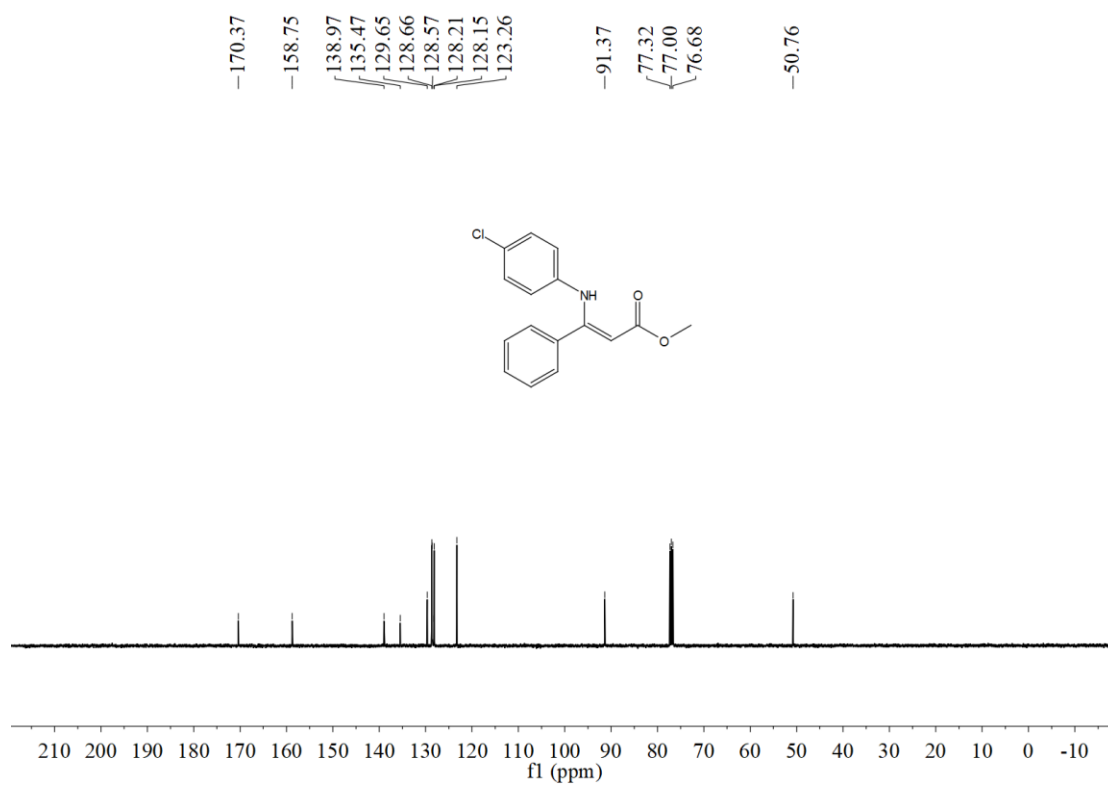

# SUPPORTING INFORMATION

## Methyl (Z)-3-((4-fluorophenyl)amino)-3-phenylacrylate (**3d**)

$^1\text{H NMR}$  (400 MHz,  $\text{CDCl}_3$ )

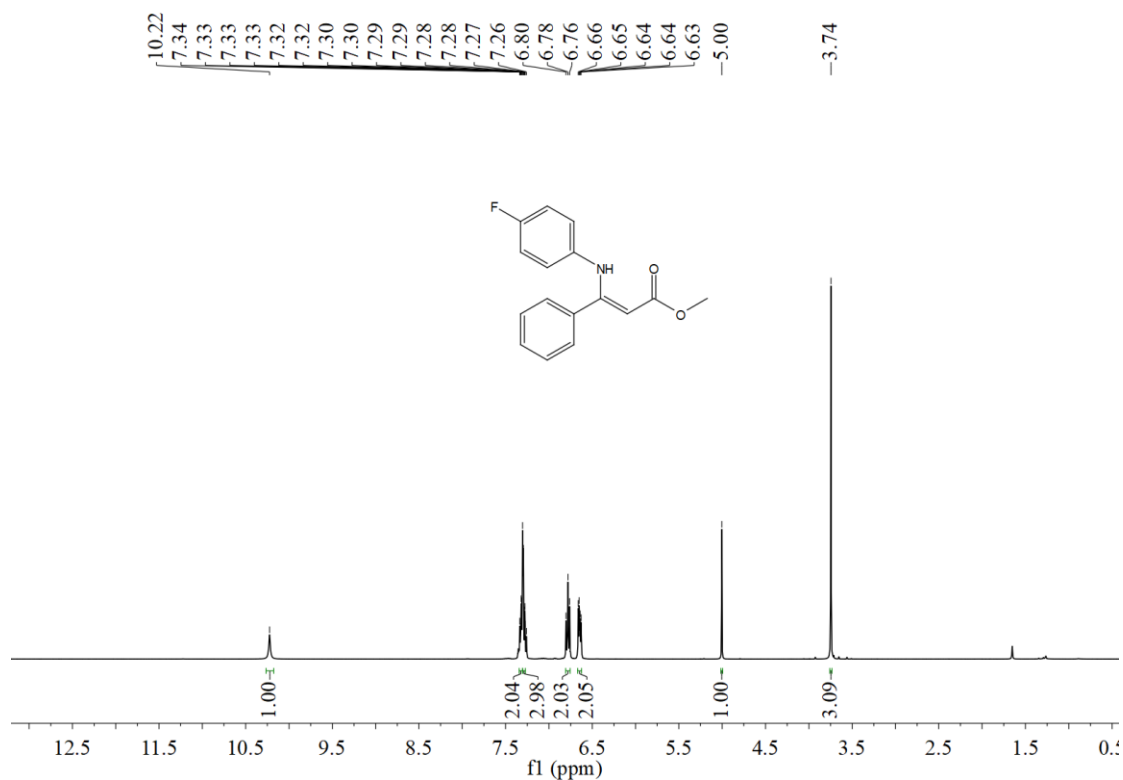

$^{13}\text{C NMR}$  (100 MHz,  $\text{CDCl}_3$ )

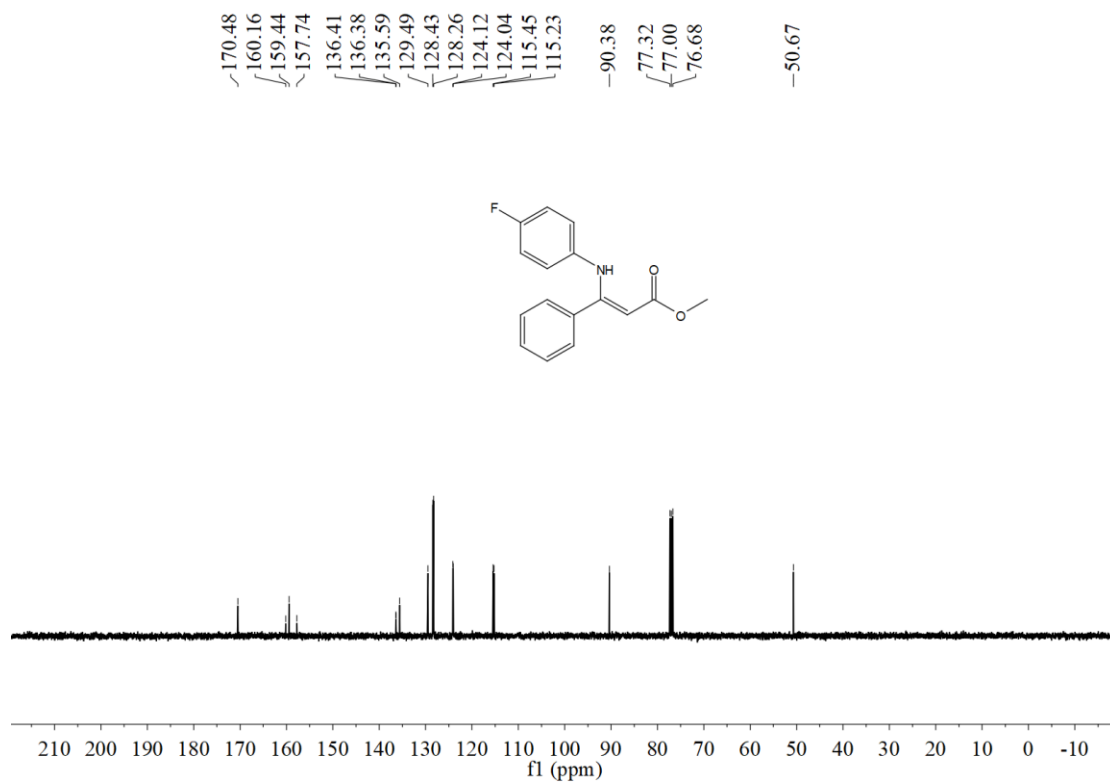

# SUPPORTING INFORMATION

**<sup>19</sup>F NMR** (376 MHz, CDCl<sub>3</sub>)

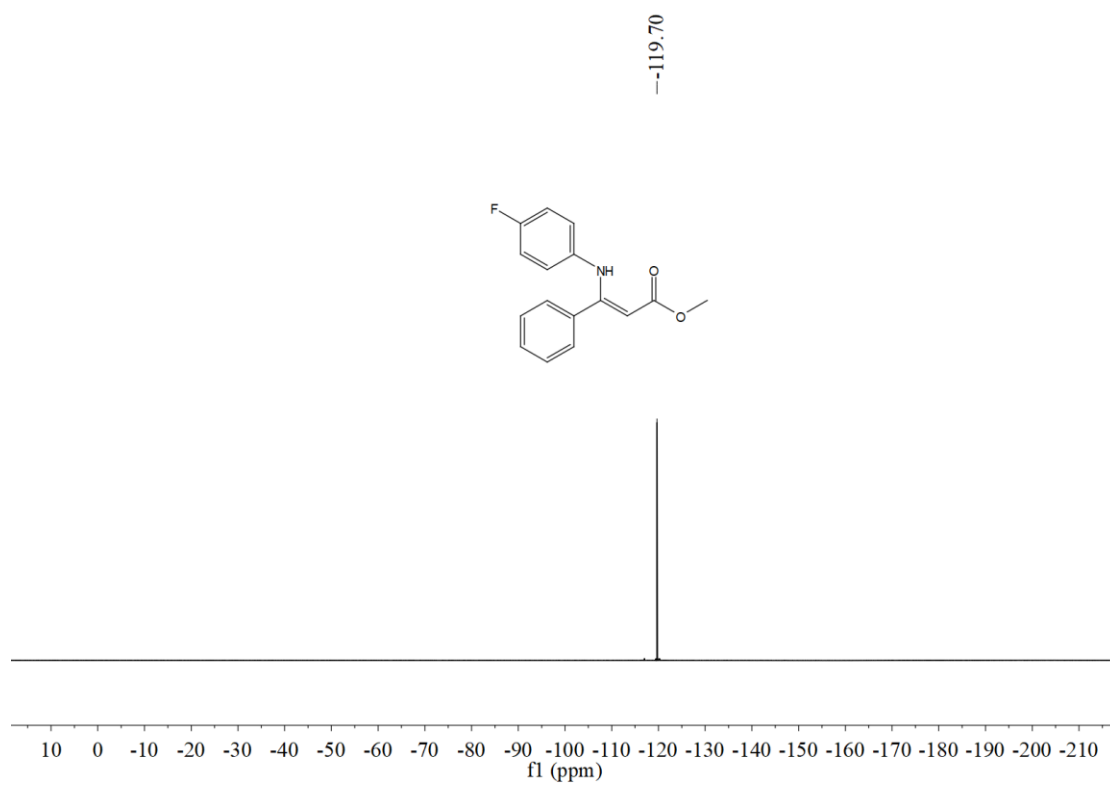



# SUPPORTING INFORMATION

## (Z)-N-(3-Methoxy-3-oxo-1-phenylprop-1-en-1-yl)-4-(trifluoromethyl)benzenaminium (**3e**)

### <sup>1</sup>H NMR (400 MHz, CDCl<sub>3</sub>)

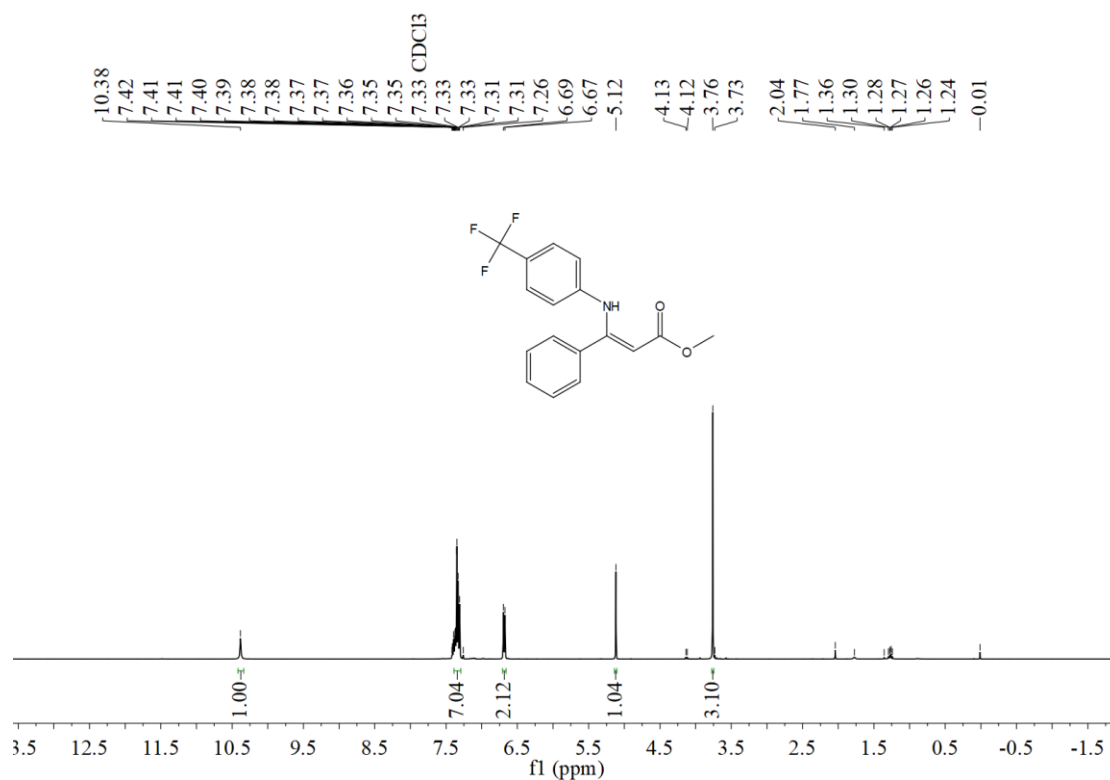

### <sup>13</sup>C NMR (100 MHz, CDCl<sub>3</sub>)

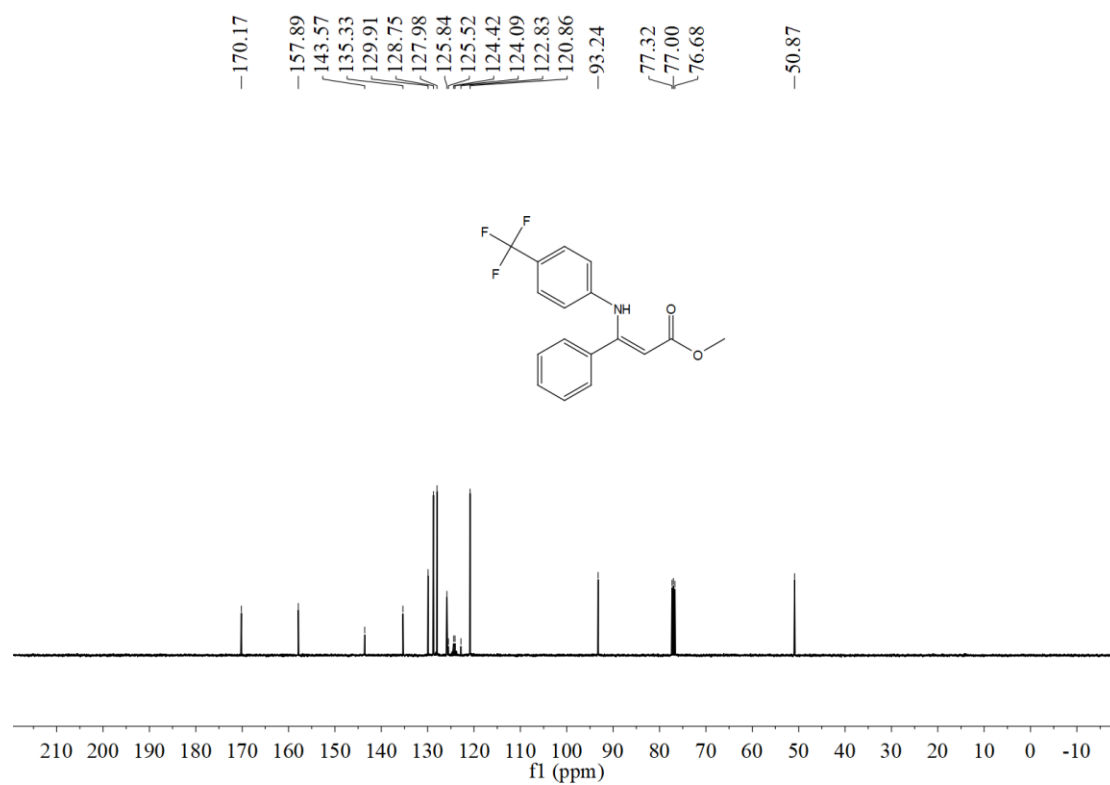

# SUPPORTING INFORMATION

$^{19}\text{F}$  NMR (376 MHz,  $\text{CDCl}_3$ )

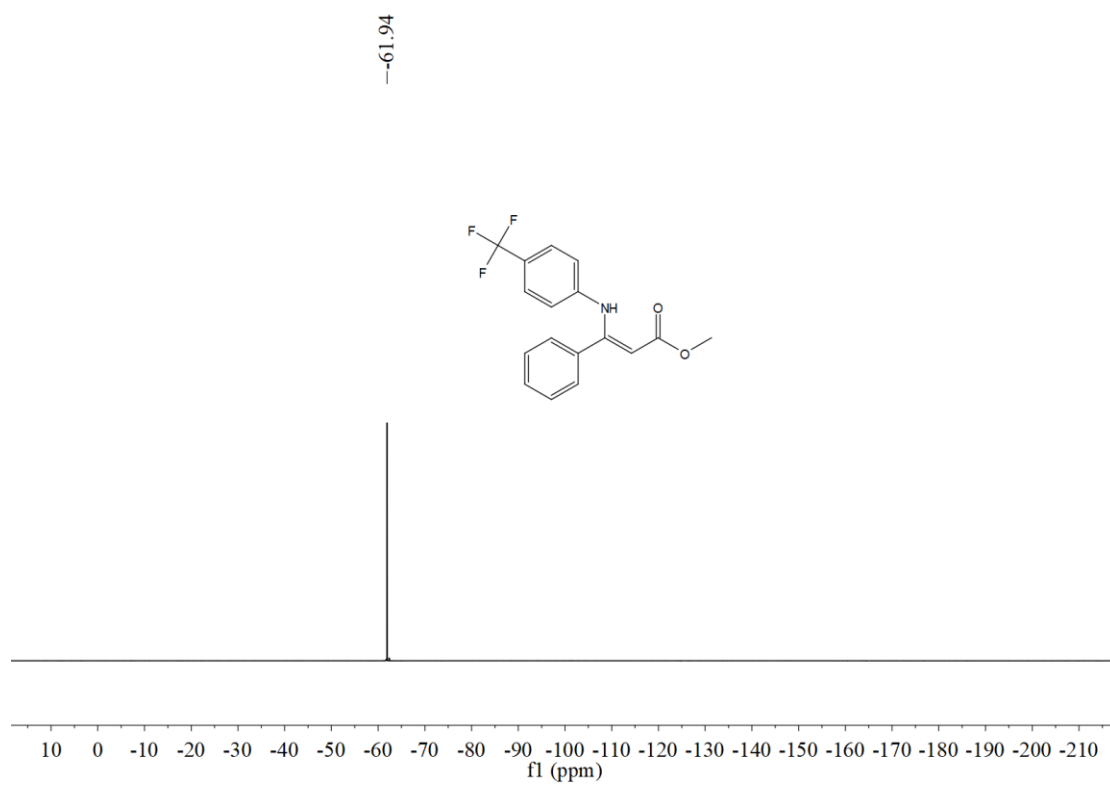

# SUPPORTING INFORMATION

## (Z)-4-Cyano-N-(3-methoxy-3-oxo-1-phenylprop-1-en-1-yl)benzenamine (**3f**)

<sup>1</sup>H NMR (400 MHz, CDCl<sub>3</sub>)

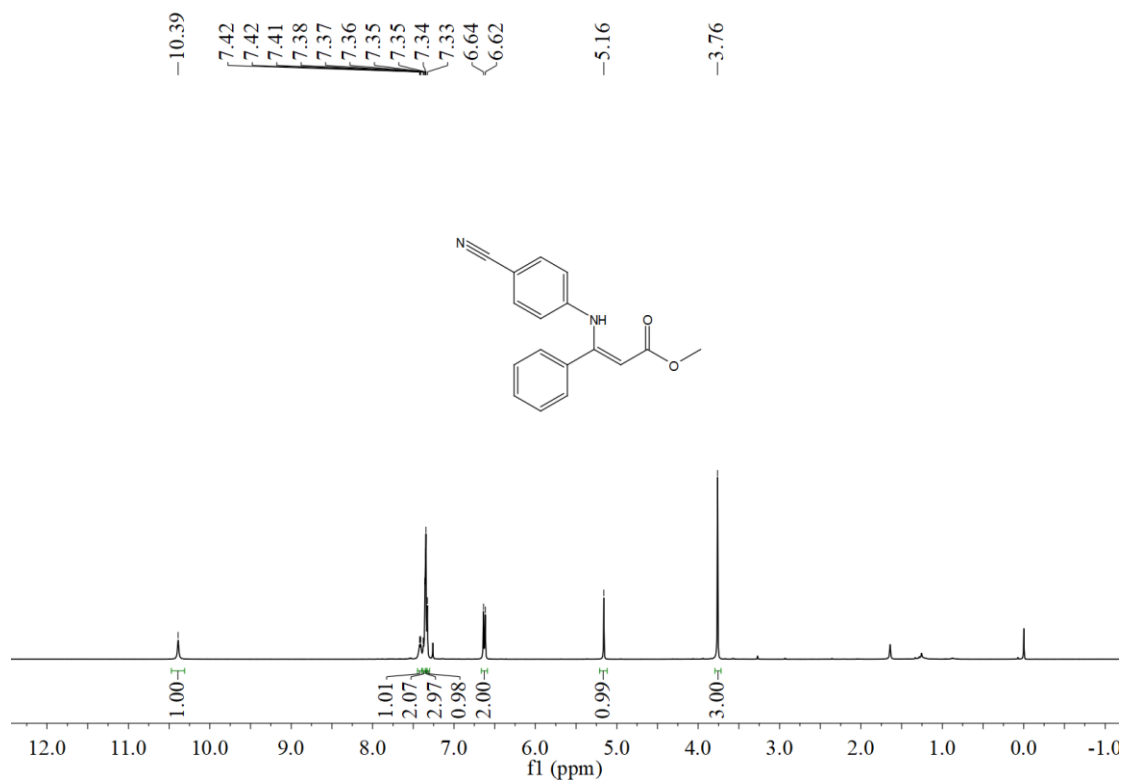

<sup>13</sup>C NMR (100 MHz, CDCl<sub>3</sub>)

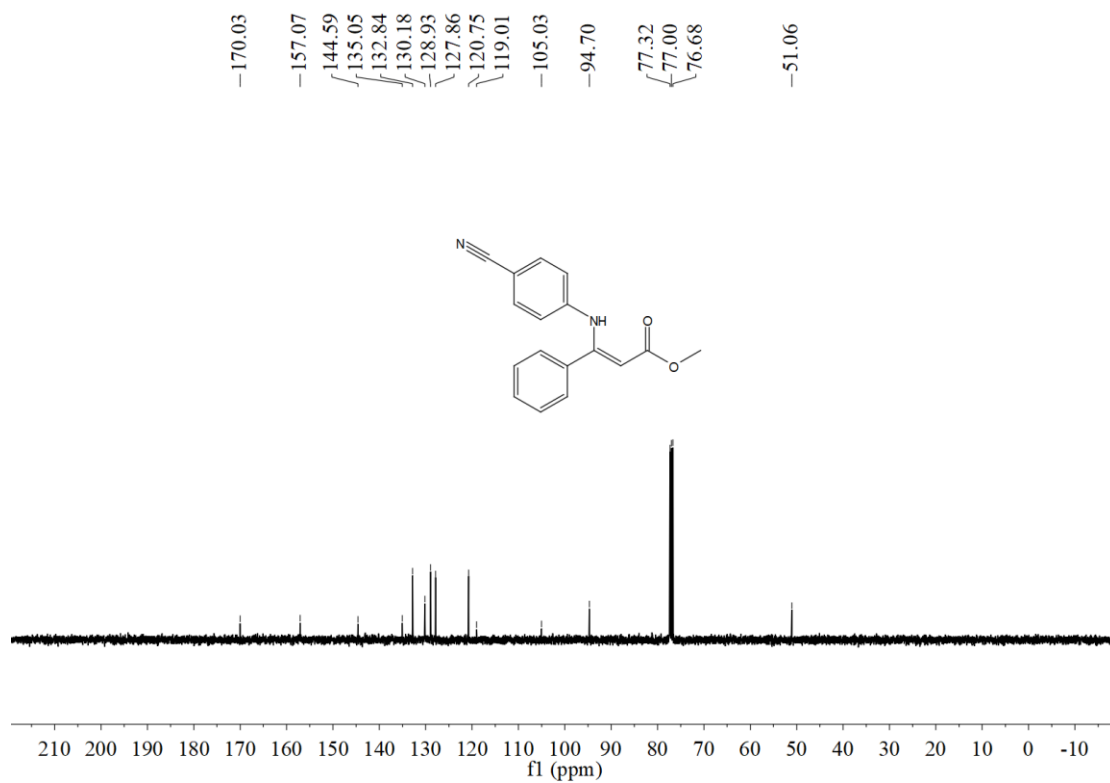

# SUPPORTING INFORMATION

## (Z)-4-Formyl-N-(3-methoxy-3-oxo-1-phenylprop-1-en-1-yl)benzenamine (**3g**)

$^1\text{H NMR}$  (400 MHz,  $\text{CDCl}_3$ )

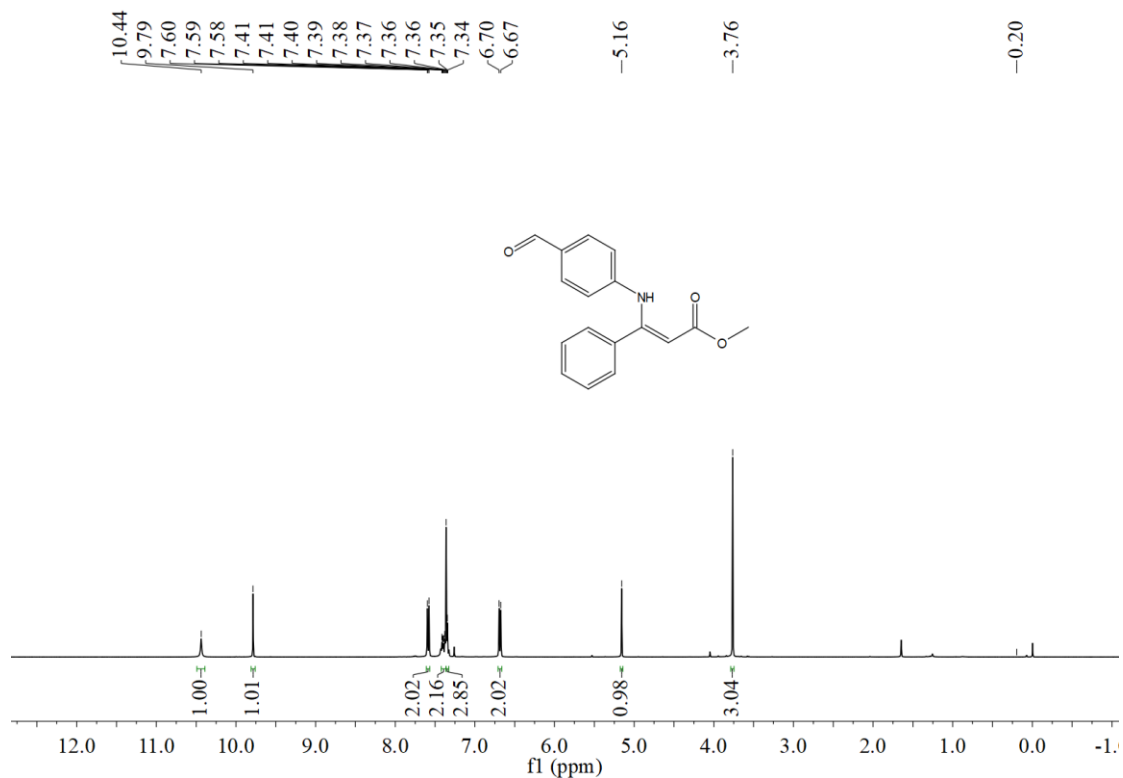

$^{13}\text{C NMR}$  (100 MHz,  $\text{CDCl}_3$ )

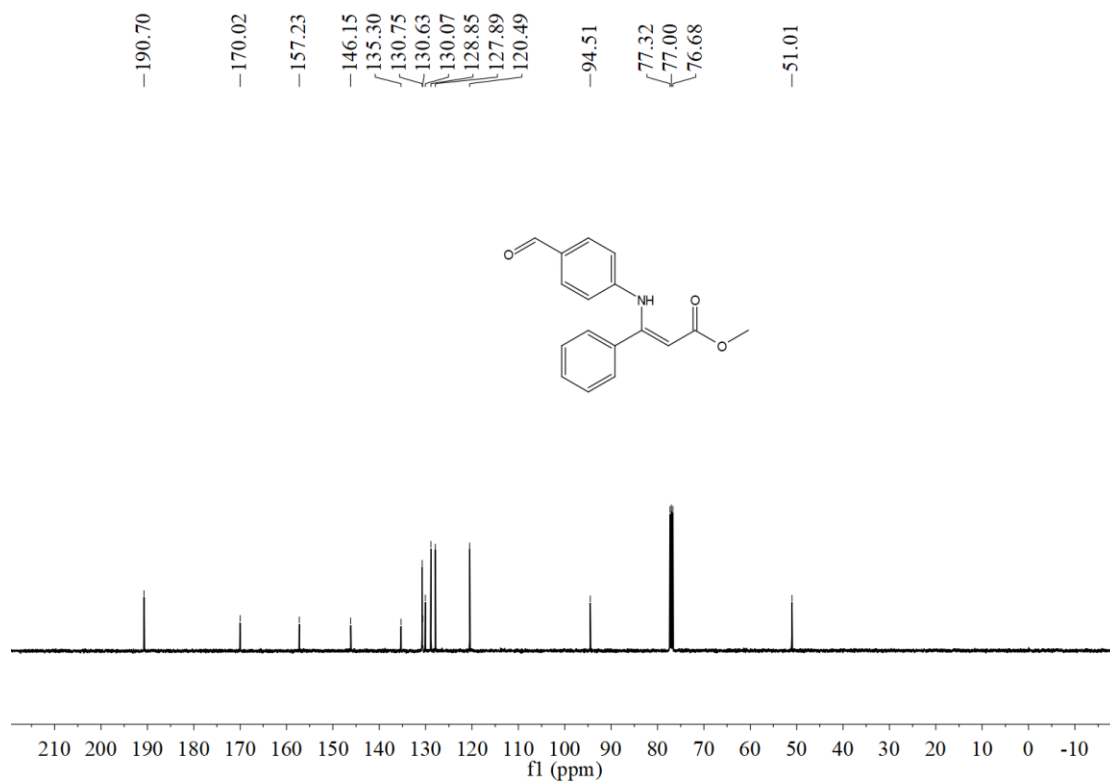

# SUPPORTING INFORMATION

## (Z)-4-Acetyl-N-(3-methoxy-3-oxo-1-phenylprop-1-en-1-yl)benzenaminium (**3h**)

<sup>1</sup>H NMR (400 MHz, CDCl<sub>3</sub>)

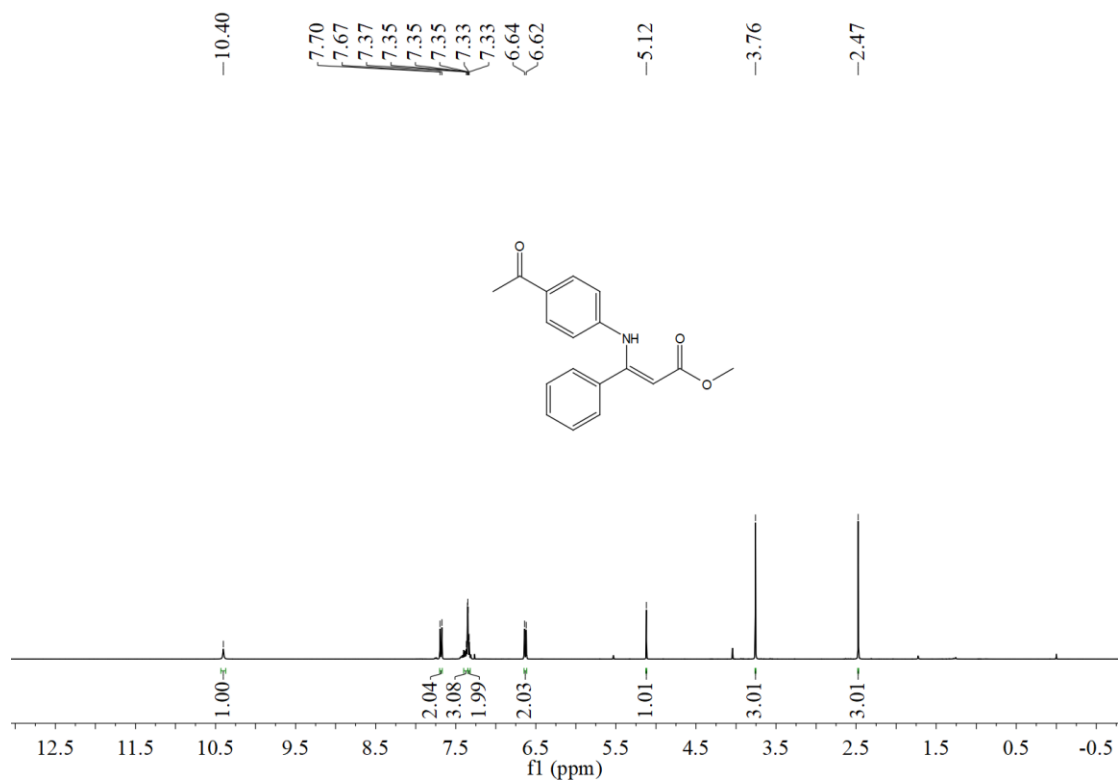

<sup>13</sup>C NMR (100 MHz, CDCl<sub>3</sub>)

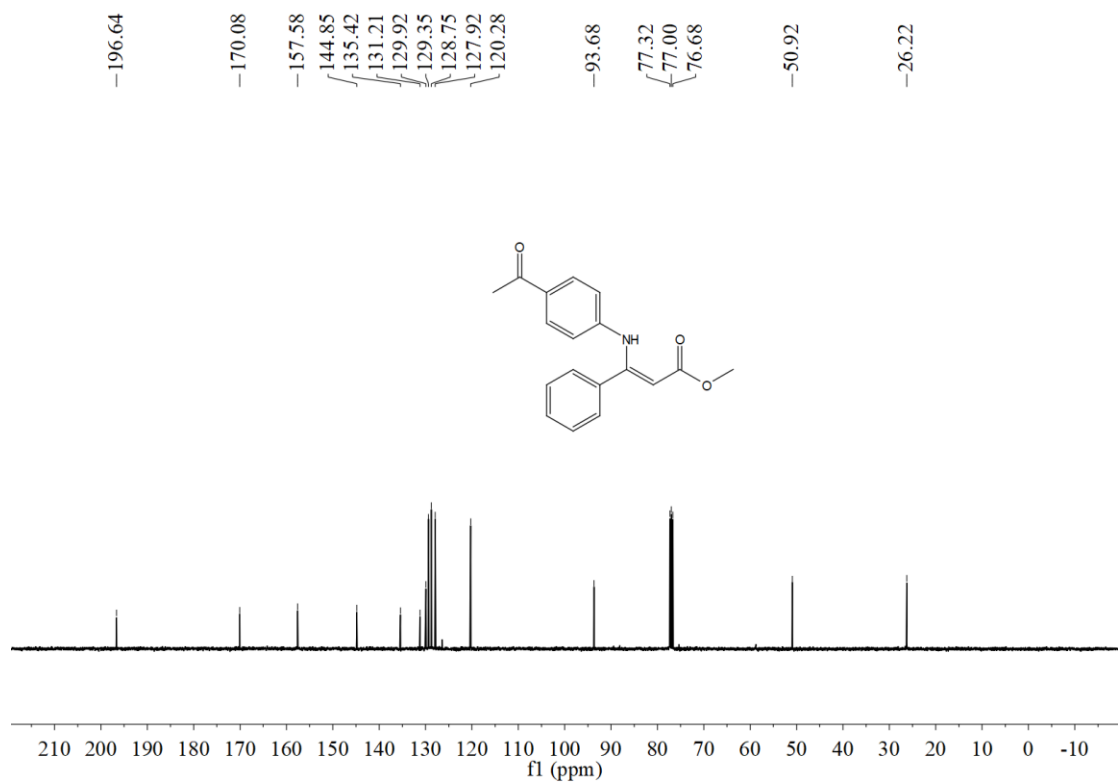

# SUPPORTING INFORMATION

(*Z*)-*N*-(3-Methoxy-3-oxo-1-phenylprop-1-en-1-yl)-4-(methoxycarbonyl)benzenaminium (**3i**)

<sup>1</sup>H NMR (400 MHz, CDCl<sub>3</sub>)

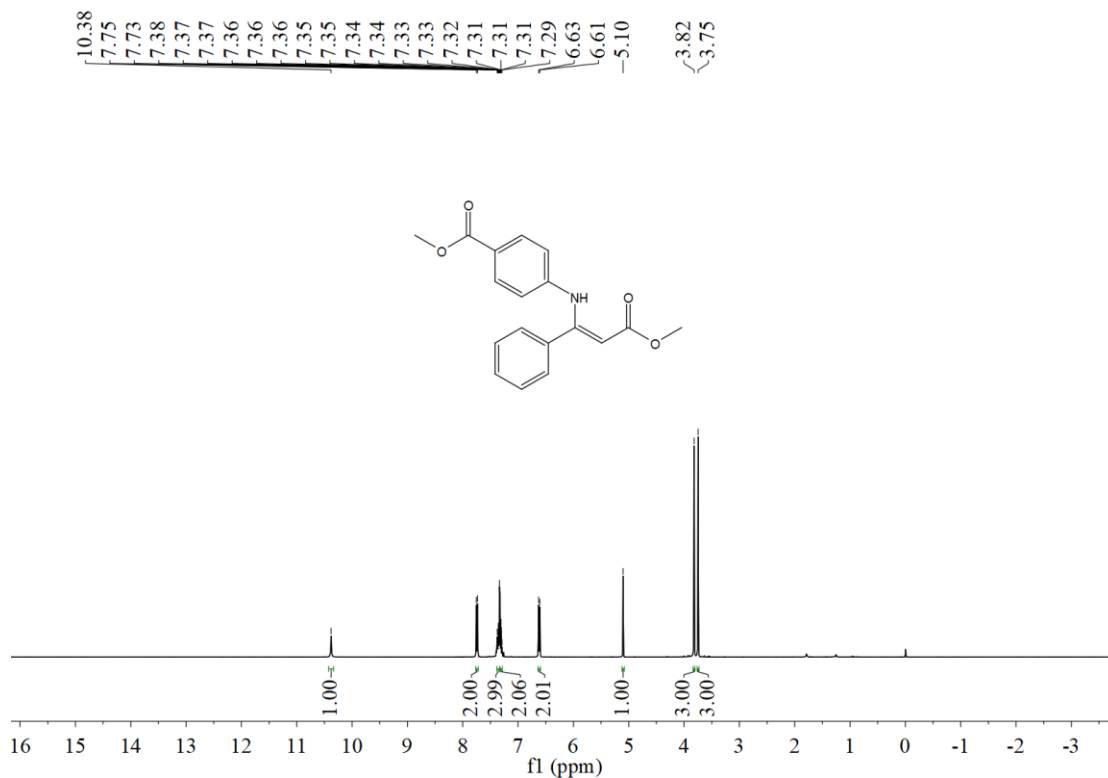

<sup>13</sup>C NMR (100 MHz, CDCl<sub>3</sub>)

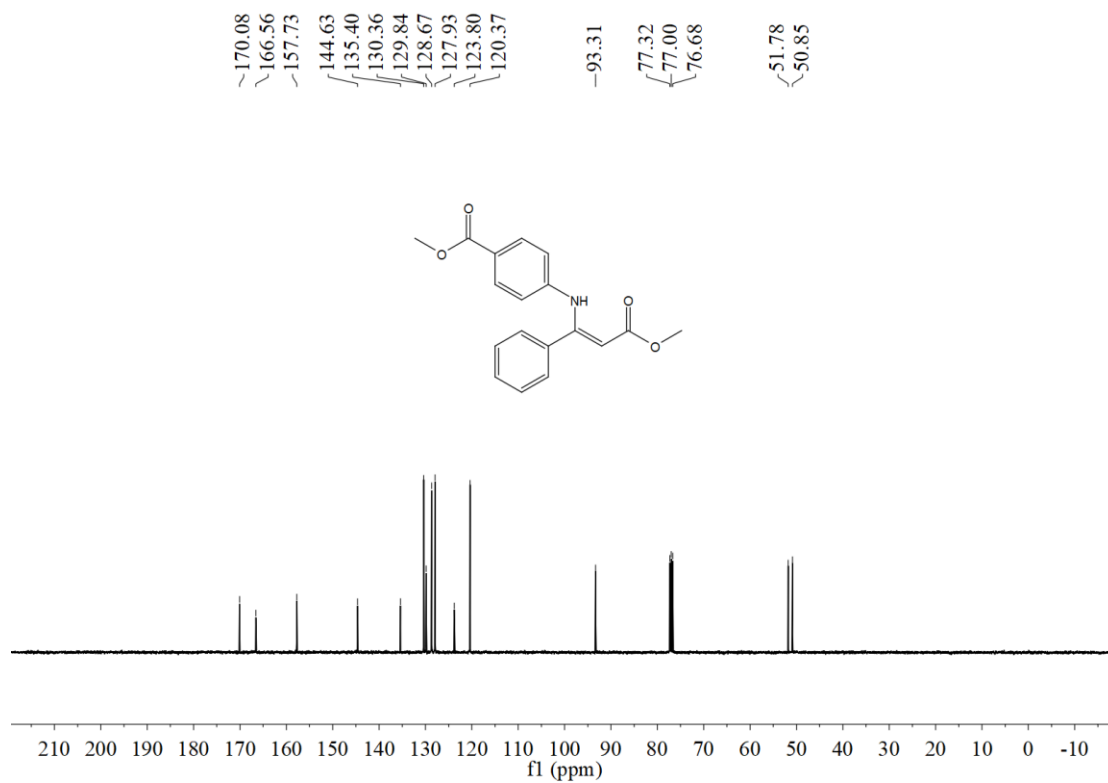

# SUPPORTING INFORMATION

## (*Z*)-4-Isopropoxy-*N*-(3-methoxy-3-oxo-1-phenylprop-1-en-1-yl)benzenaminium (**3j**)

$^1\text{H NMR}$  (400 MHz,  $\text{CDCl}_3$ )

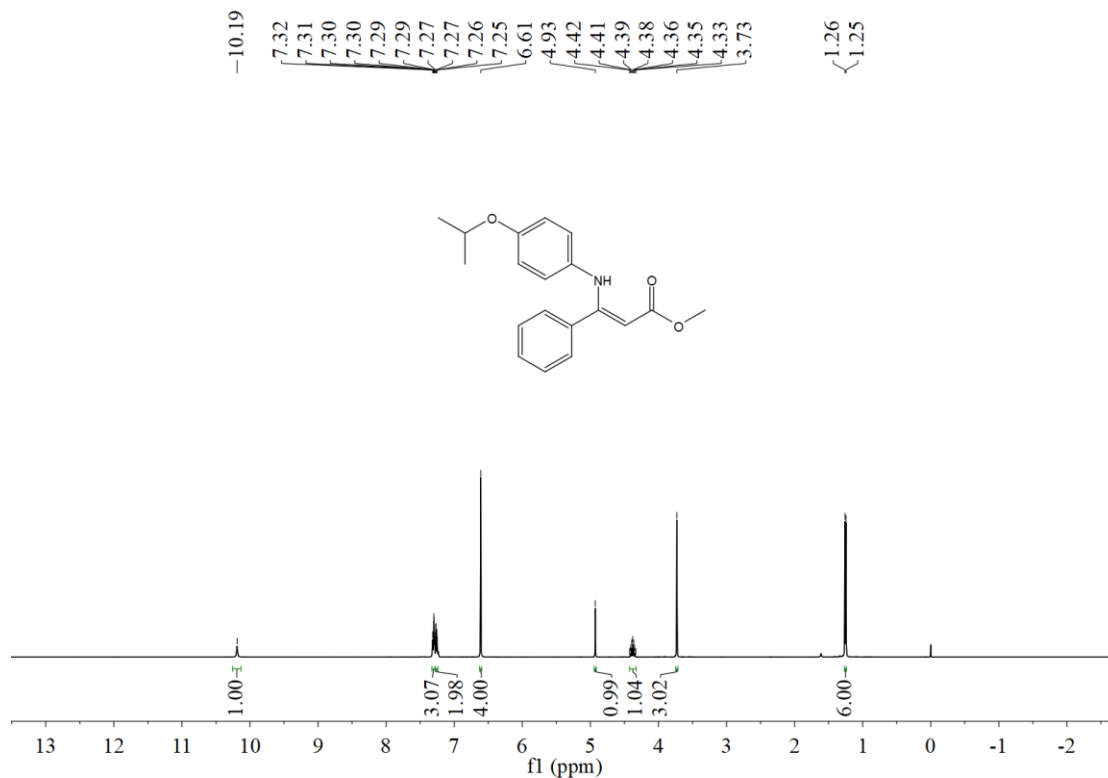

$^{13}\text{C NMR}$  (100 MHz,  $\text{CDCl}_3$ )

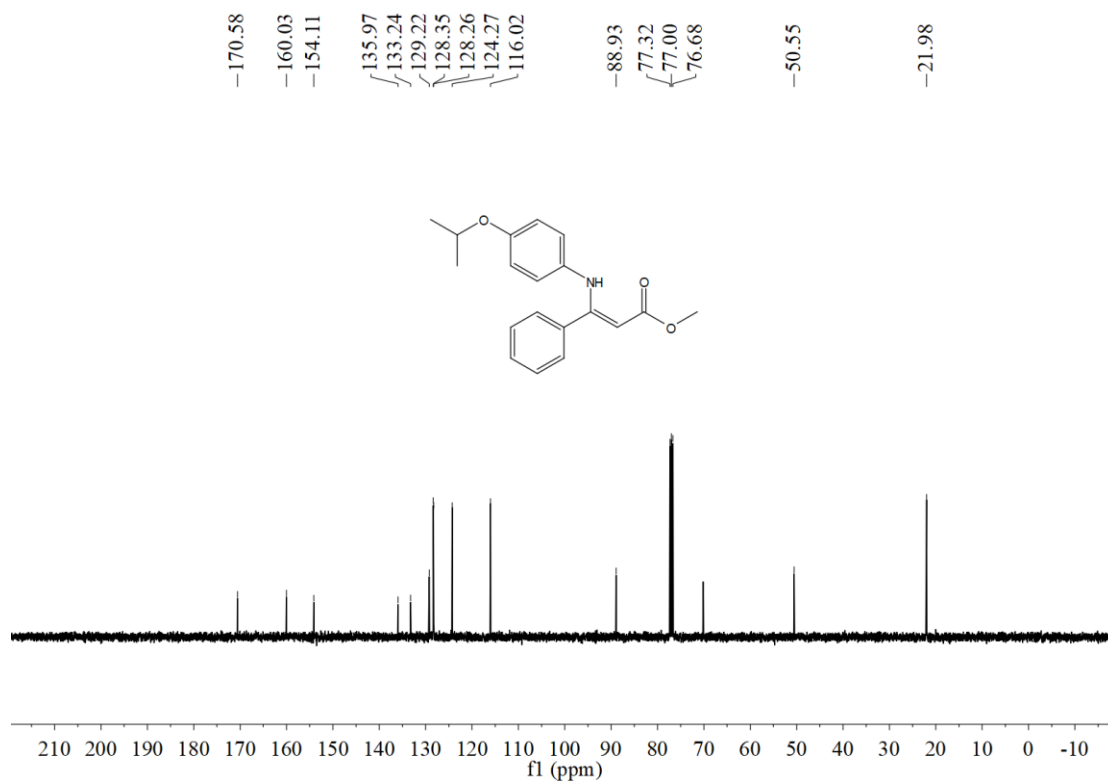

# SUPPORTING INFORMATION

## (Z)-4-Methoxy-N-(3-methoxy-3-oxo-1-phenylprop-1-en-1-yl)benzenaminium (**3k**)

$^1\text{H NMR}$  (400 MHz,  $\text{CDCl}_3$ )

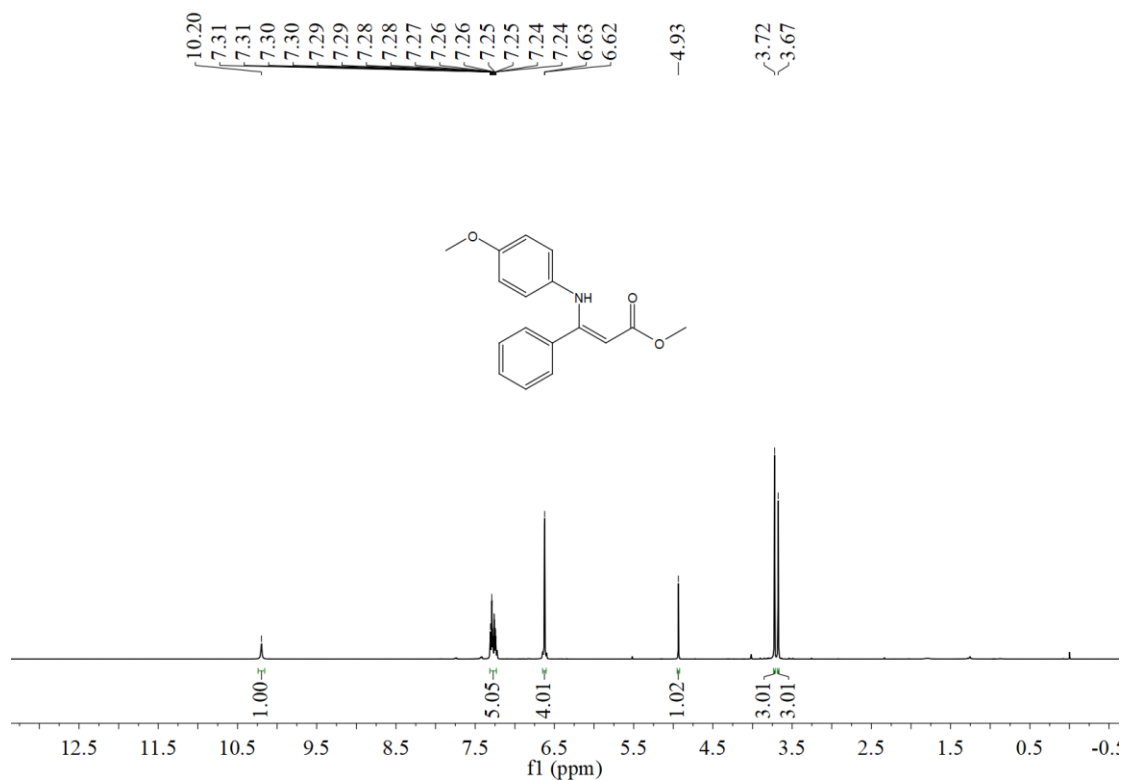

$^{13}\text{C NMR}$  (100 MHz,  $\text{CDCl}_3$ )

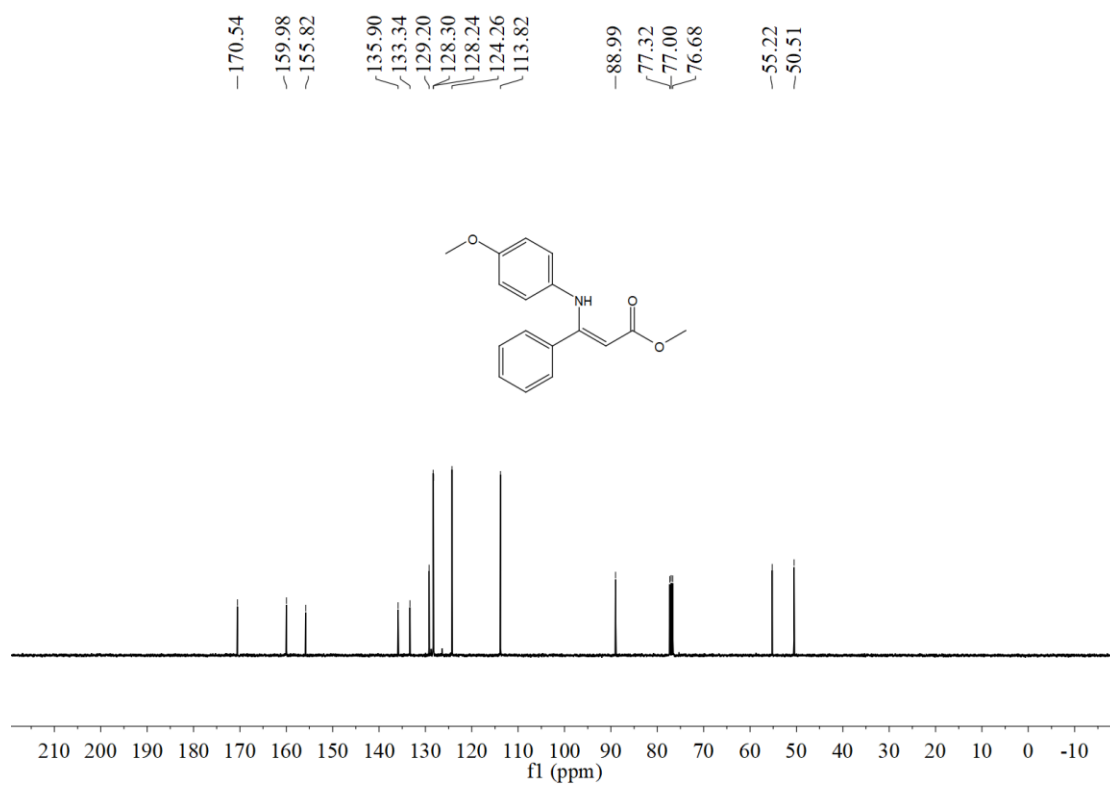



# SUPPORTING INFORMATION

## (Z)-4-(*tert*-Butyl)-*N*-(3-methoxy-3-oxo-1-phenylprop-1-en-1-yl)benzenaminium (**3I**)

$^1\text{H}$  NMR (400 MHz,  $\text{CDCl}_3$ )

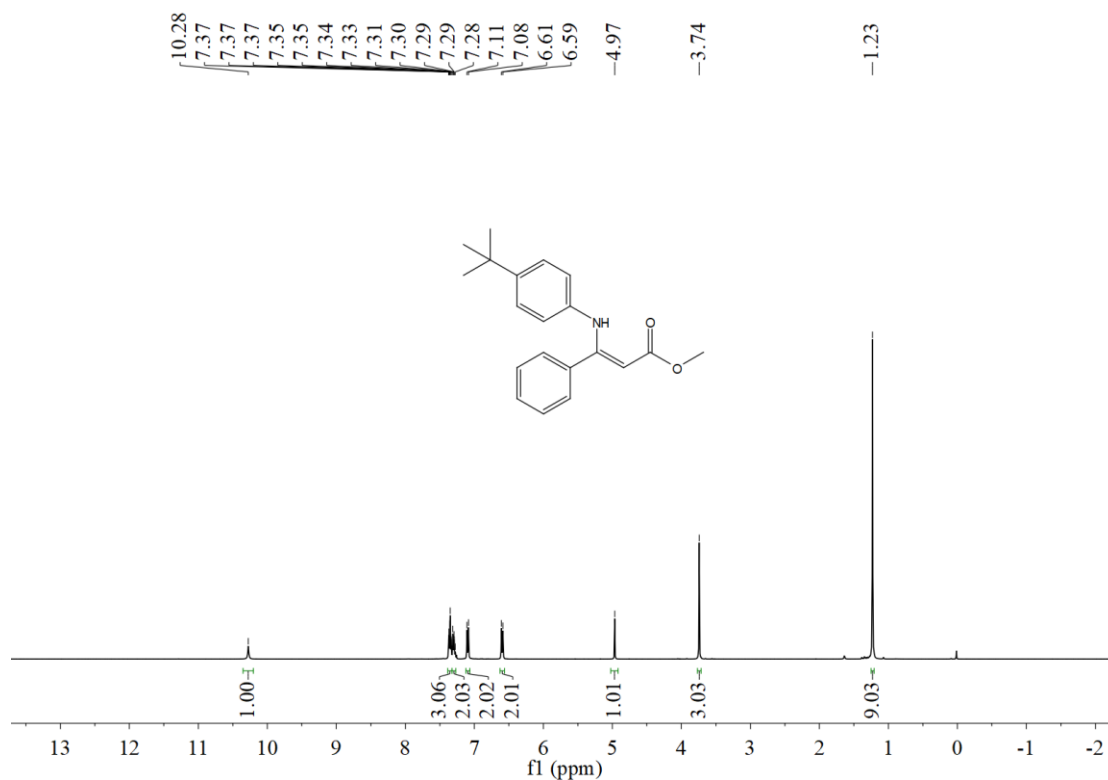

$^{13}\text{C}$  NMR (100 MHz,  $\text{CDCl}_3$ )

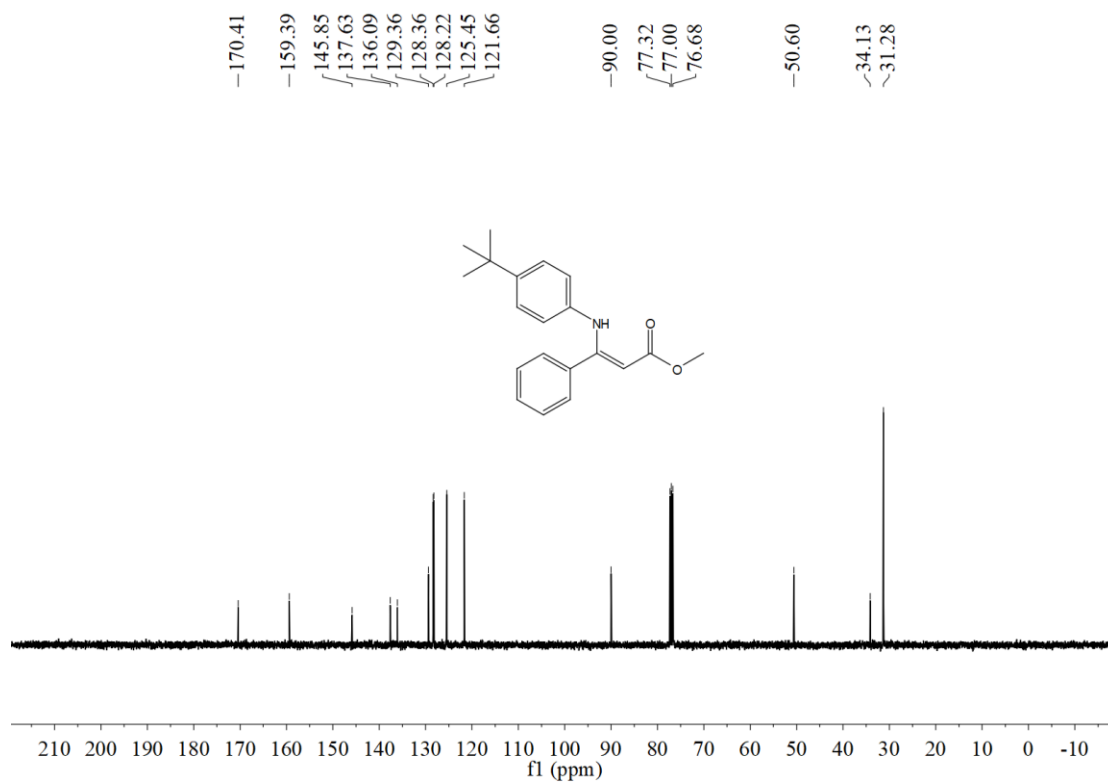

# SUPPORTING INFORMATION

## (*Z*)-4-(Diphenylamino)-*N*-(3-methoxy-3-oxo-1-phenylprop-1-en-1-yl)benzenaminium (**3m**)

### <sup>1</sup>H NMR (400 MHz, CDCl<sub>3</sub>)

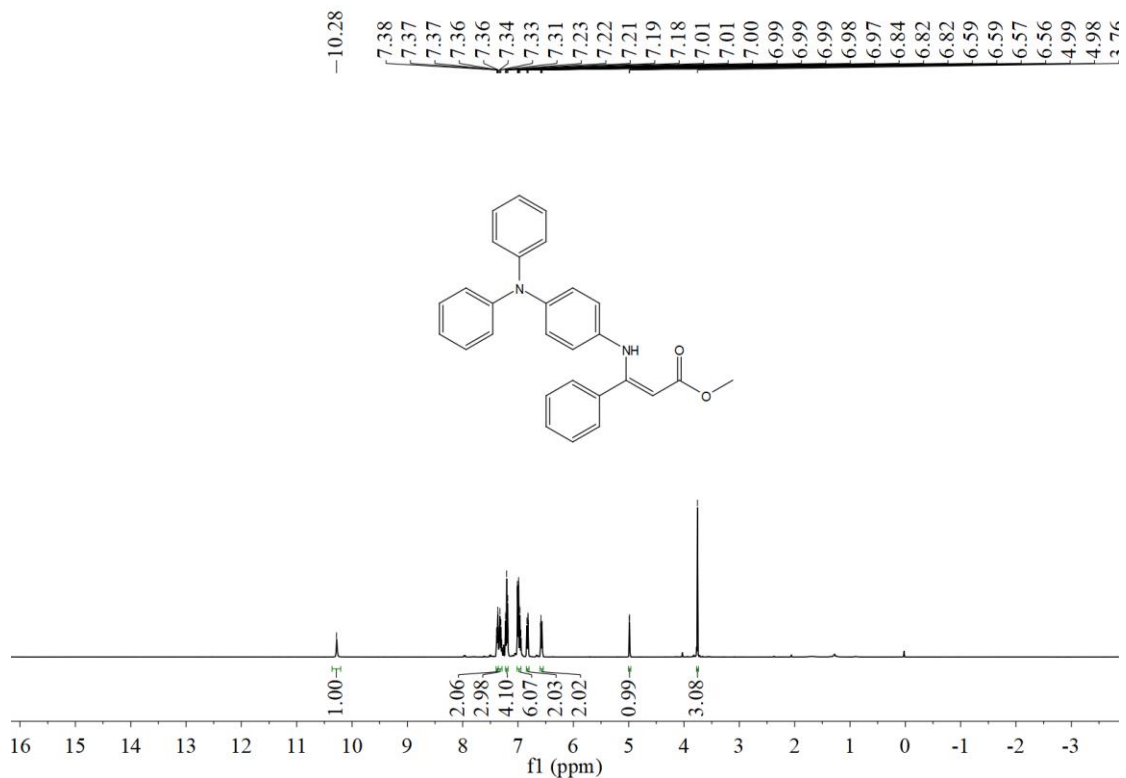

### <sup>13</sup>C NMR (100 MHz, CDCl<sub>3</sub>)

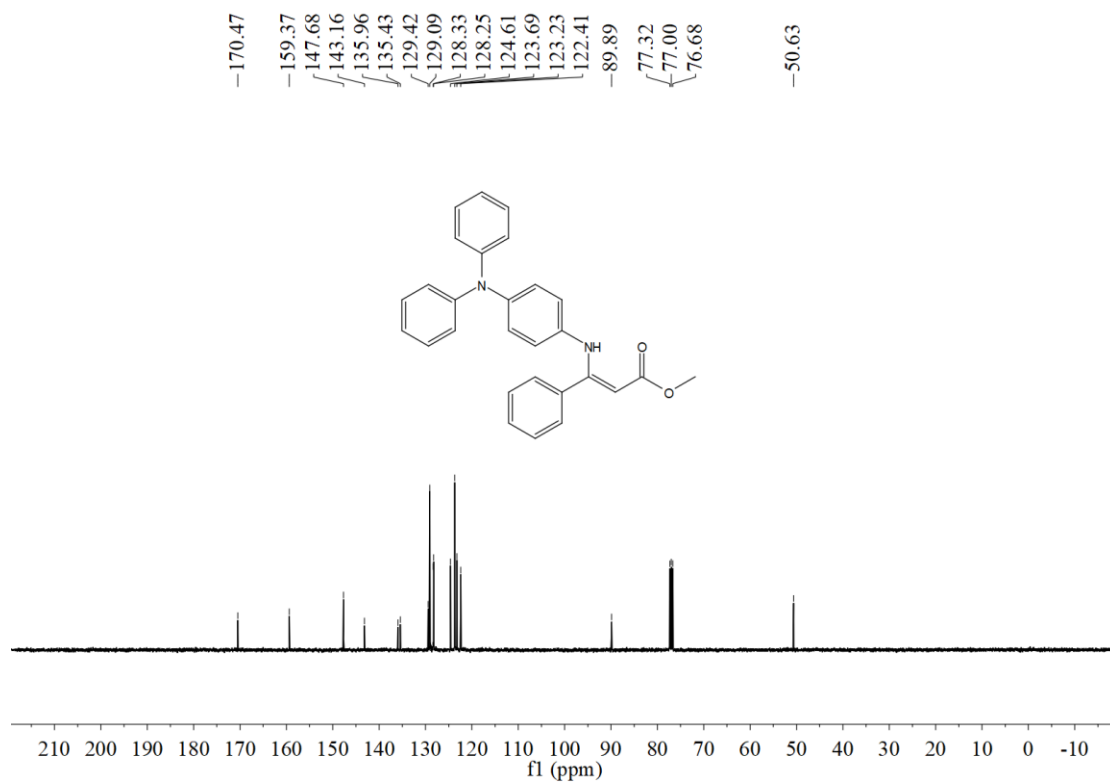

# SUPPORTING INFORMATION

## (*Z*)-4-(Hydroxymethyl)-*N*-(3-methoxy-3-oxo-1-phenylprop-1-en-1-yl)benzenaminium (**3n**)

### <sup>1</sup>H NMR (400 MHz, CDCl<sub>3</sub>)

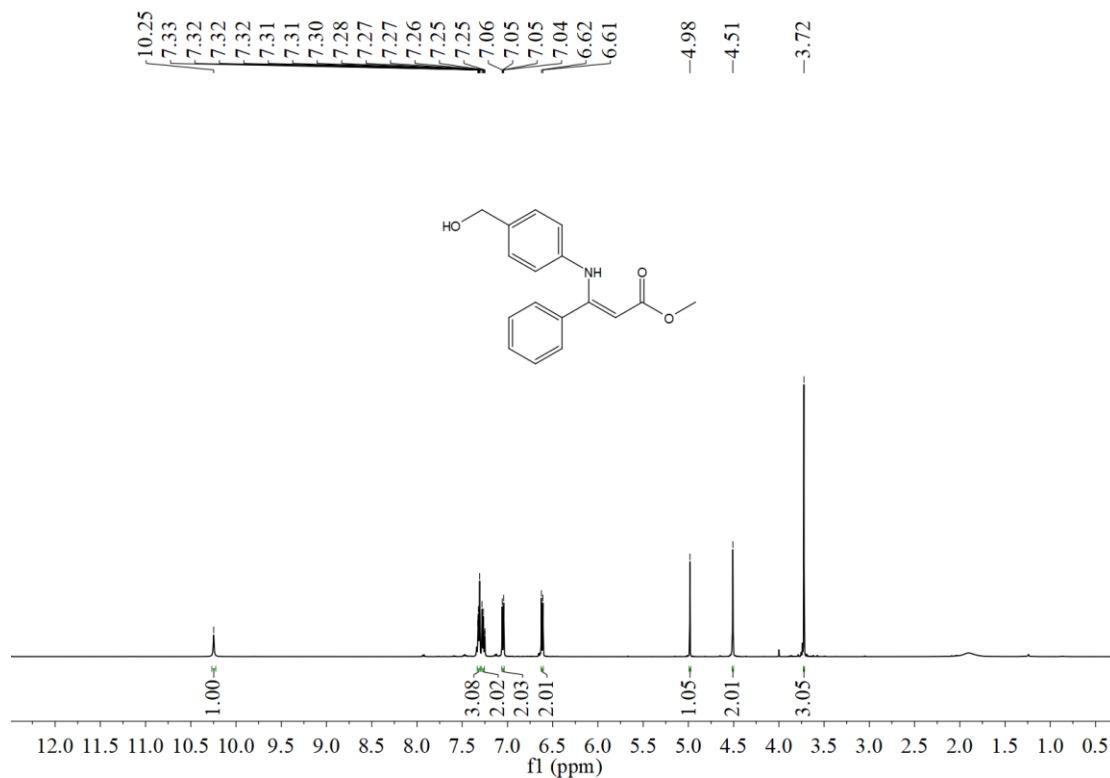

### <sup>13</sup>C NMR (100 MHz, CDCl<sub>3</sub>)

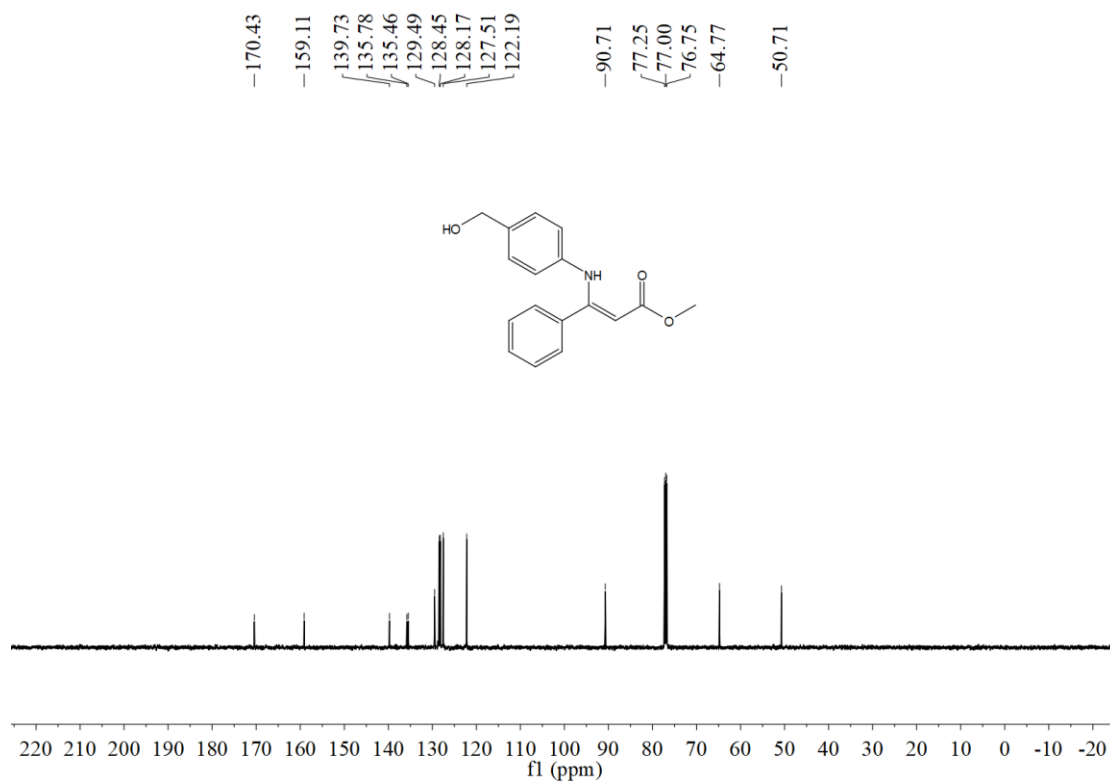

# SUPPORTING INFORMATION

## (Z)-N-(3-Methoxy-3-oxo-1-phenylprop-1-en-1-yl)-2-methylbenzenaminium (**3o**)

### <sup>1</sup>H NMR (400 MHz, CDCl<sub>3</sub>)

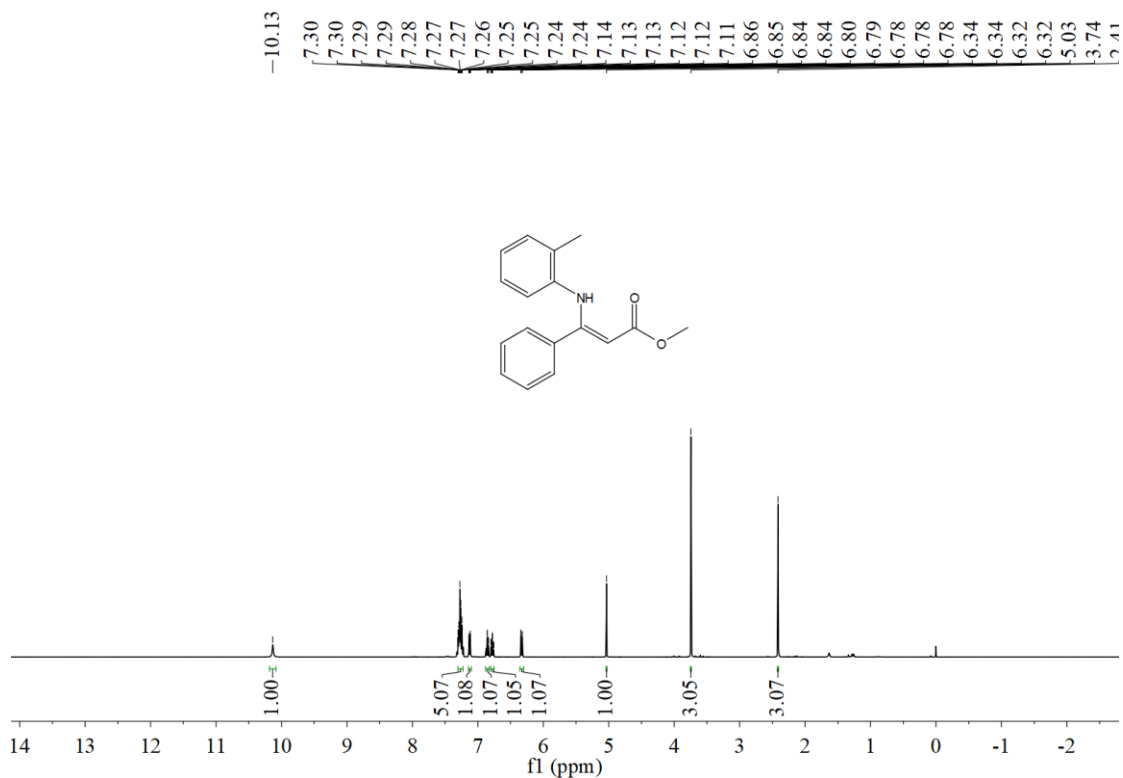

### <sup>13</sup>C NMR (100 MHz, CDCl<sub>3</sub>)

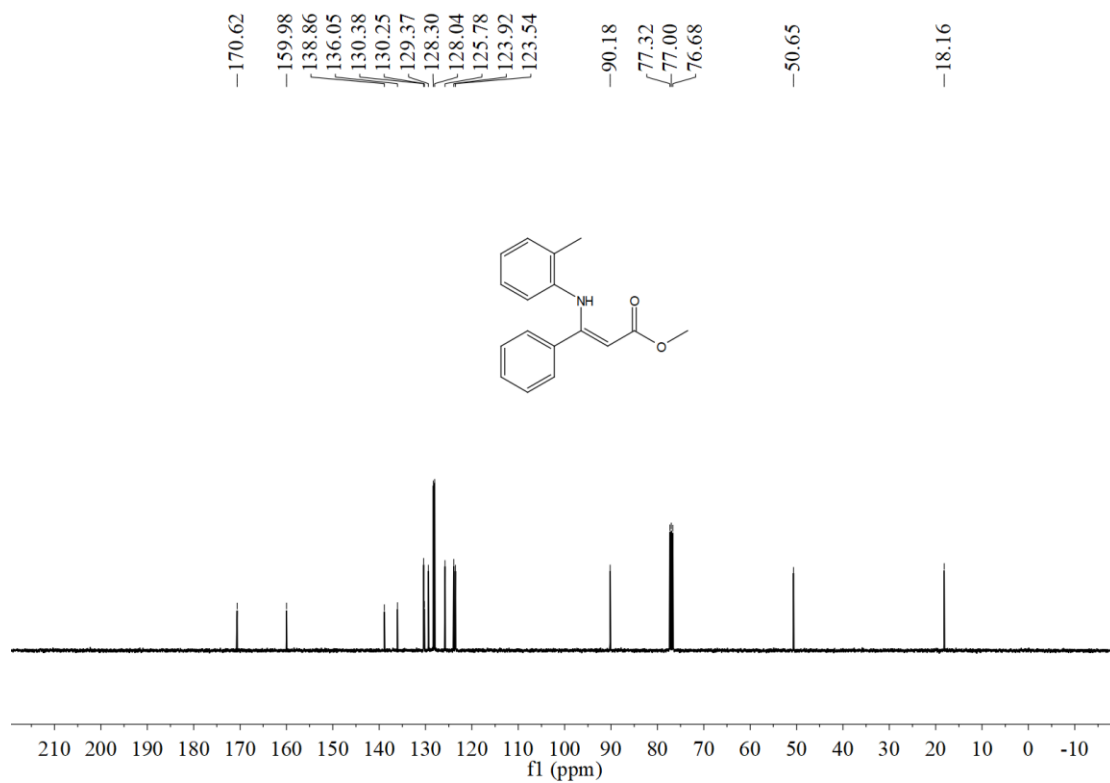

# SUPPORTING INFORMATION

## (*Z*)-*N*-(3-Methoxy-3-oxo-1-phenylprop-1-en-1-yl)naphthalen-2-aminium (**3p**)

<sup>1</sup>H NMR (400 MHz, CDCl<sub>3</sub>)

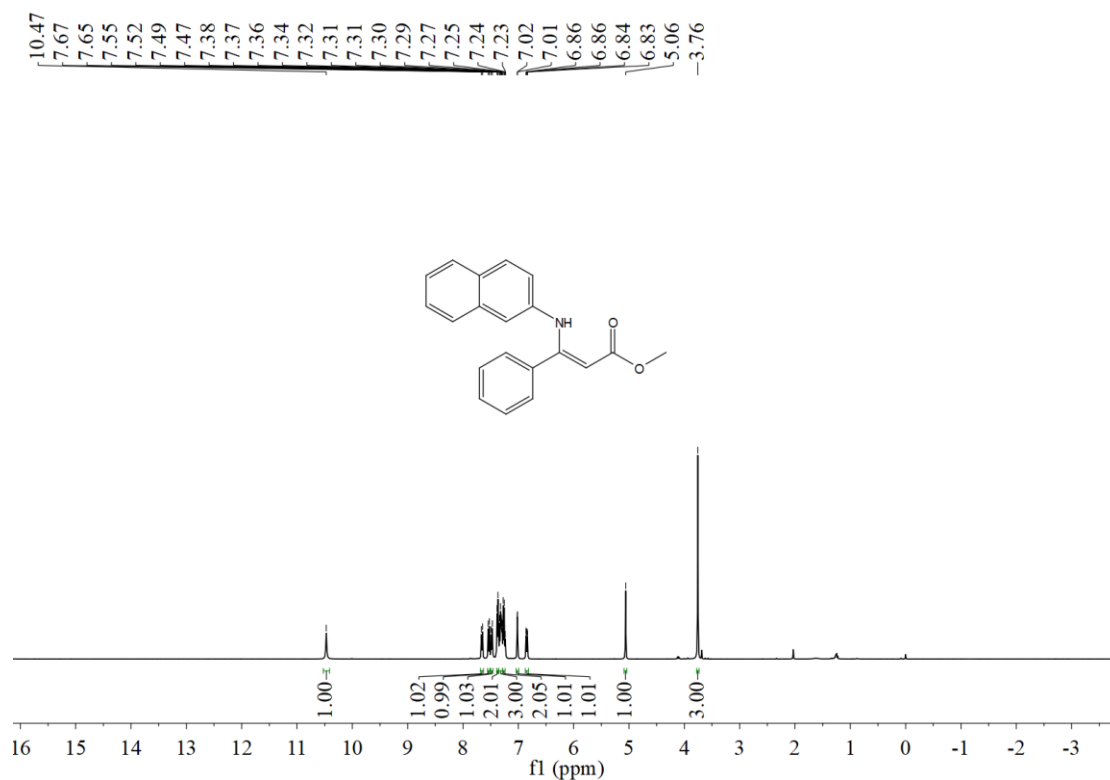

<sup>13</sup>C NMR (100 MHz, CDCl<sub>3</sub>)

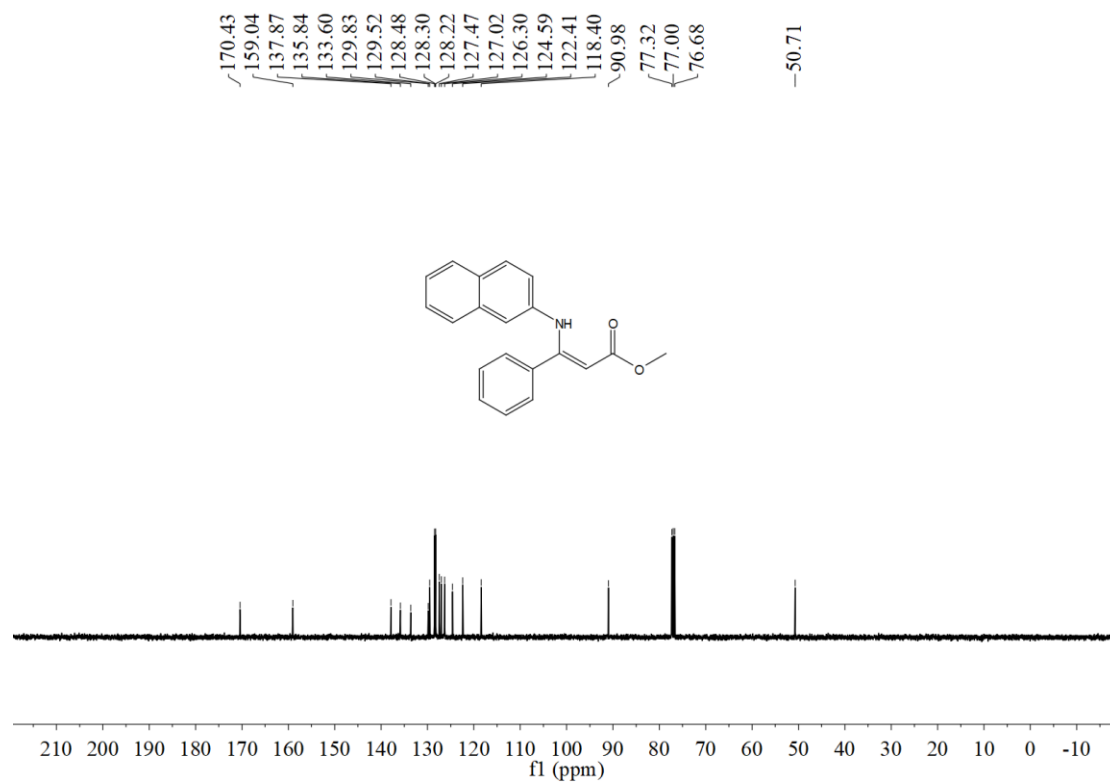

# SUPPORTING INFORMATION

## (*Z*)-*N*-(3-Methoxy-3-oxo-1-phenylprop-1-en-1-yl)-9,9'-spirobifluoren-3-aminium (**3q**)

### <sup>1</sup>H NMR (400 MHz, CDCl<sub>3</sub>)

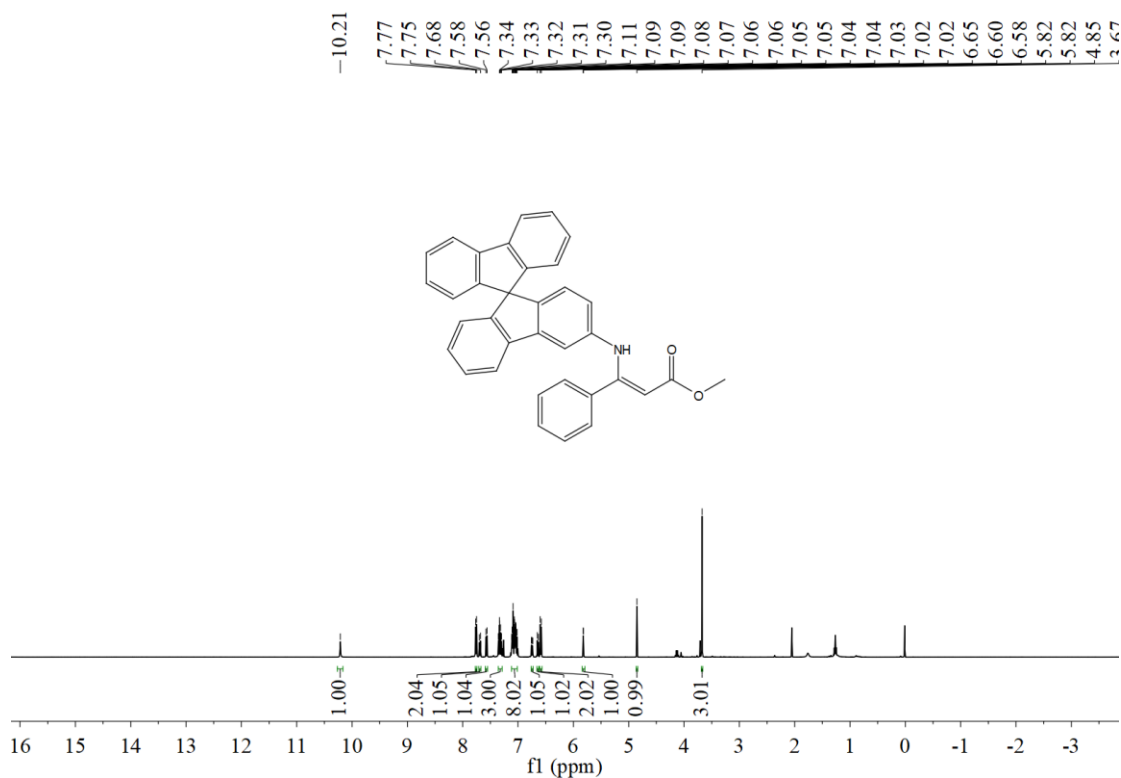

### <sup>13</sup>C NMR (100 MHz, CDCl<sub>3</sub>)

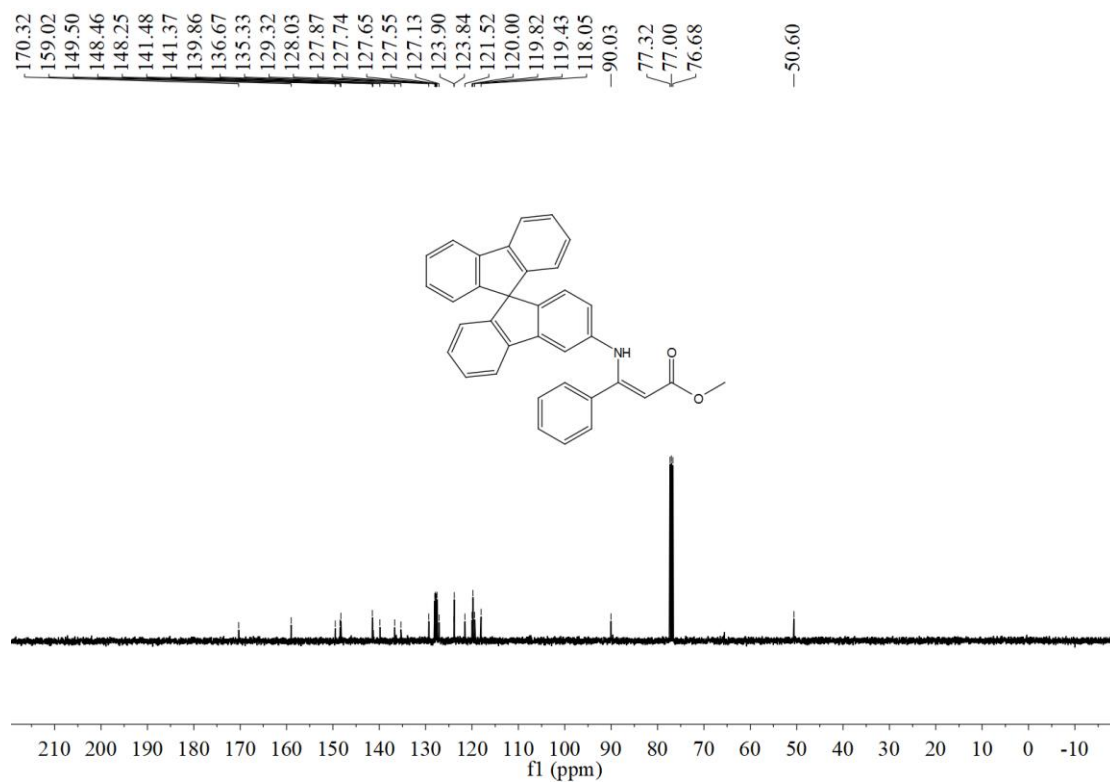

# SUPPORTING INFORMATION

## (Z)-N-(3-Methoxy-3-oxo-1-phenylprop-1-en-1-yl)pyren-1-aminium (**3r**)

<sup>1</sup>H NMR (400 MHz, CDCl<sub>3</sub>)

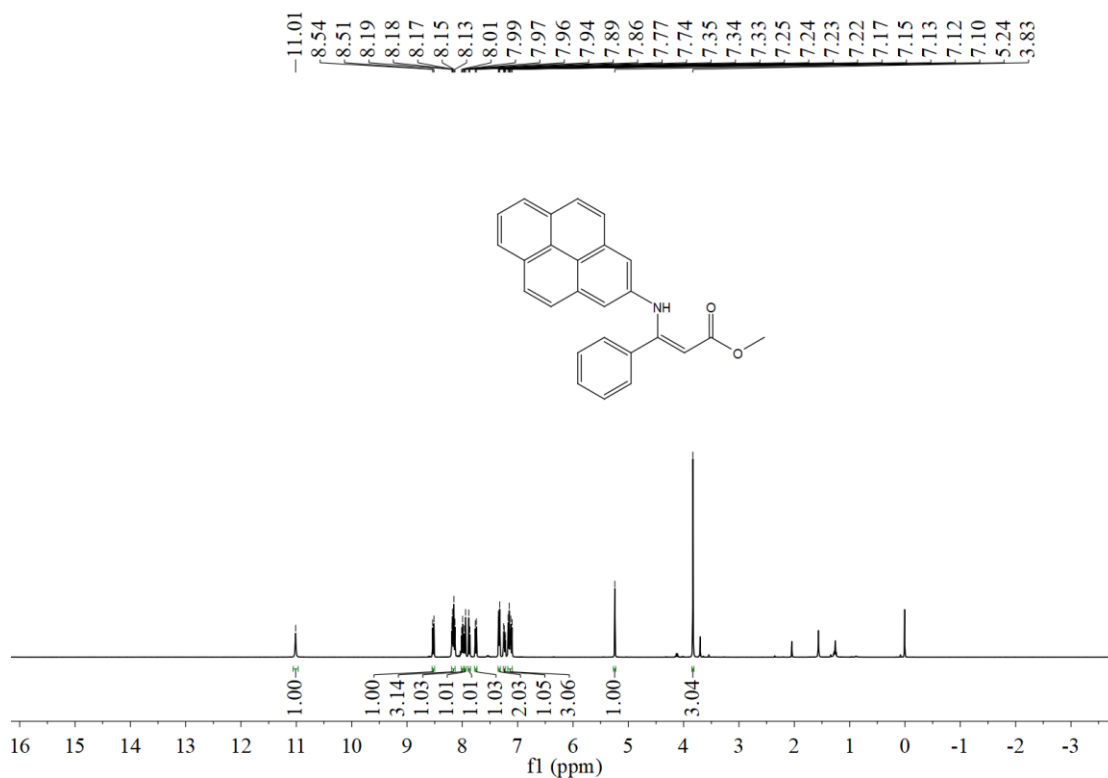

<sup>13</sup>C NMR (100 MHz, CDCl<sub>3</sub>)

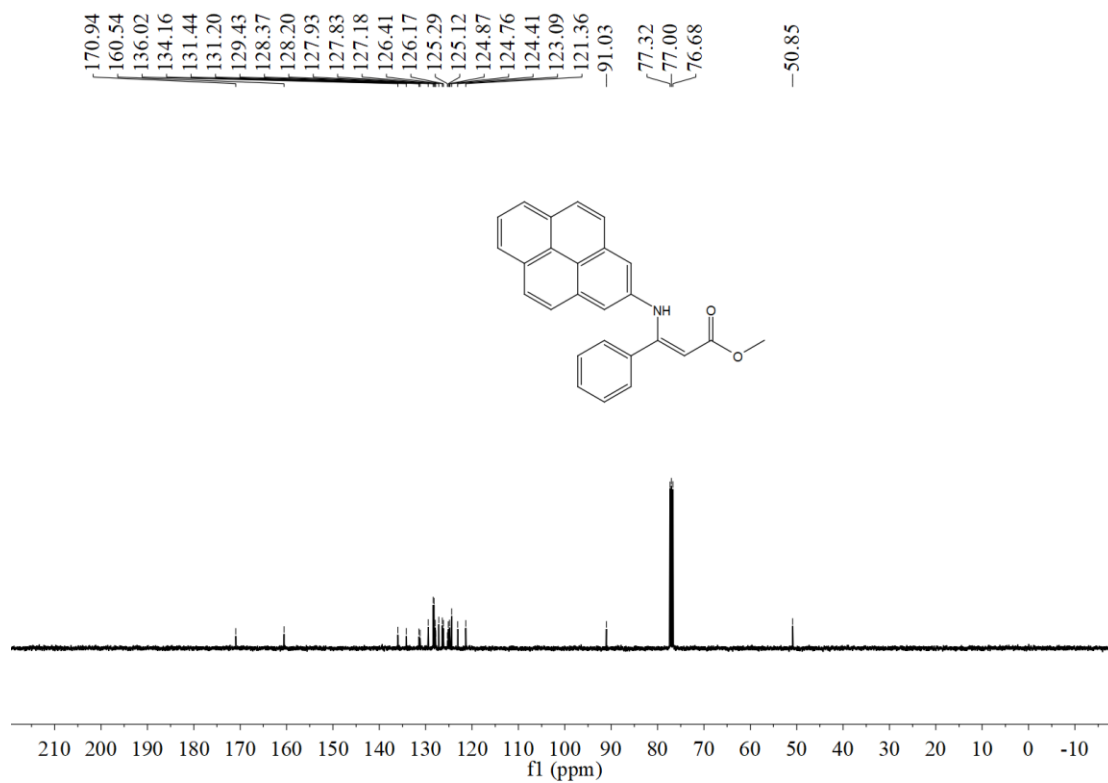

# SUPPORTING INFORMATION

(*Z*)-4-(9H-Carbazol-9-yl)-*N*-(3-methoxy-3-oxo-1-phenylprop-1-en-1-yl)benzenaminium (**3s**)

<sup>1</sup>H NMR (400 MHz, CDCl<sub>3</sub>)

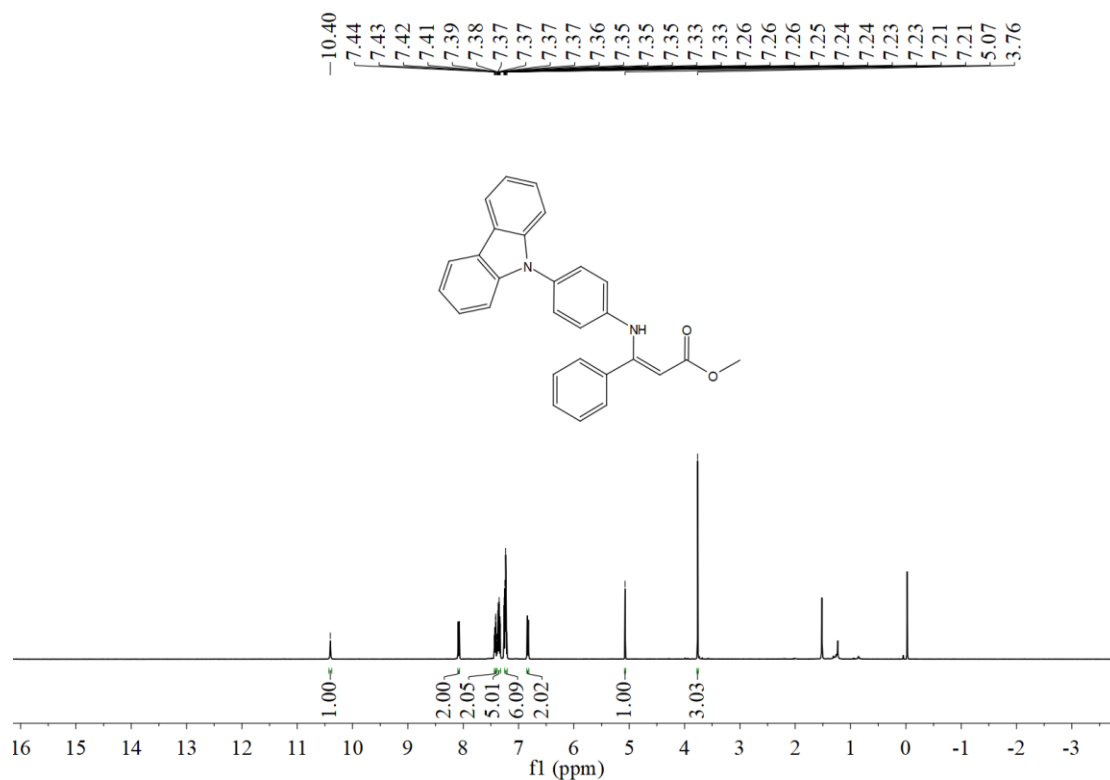

<sup>13</sup>C NMR (100 MHz, CDCl<sub>3</sub>)

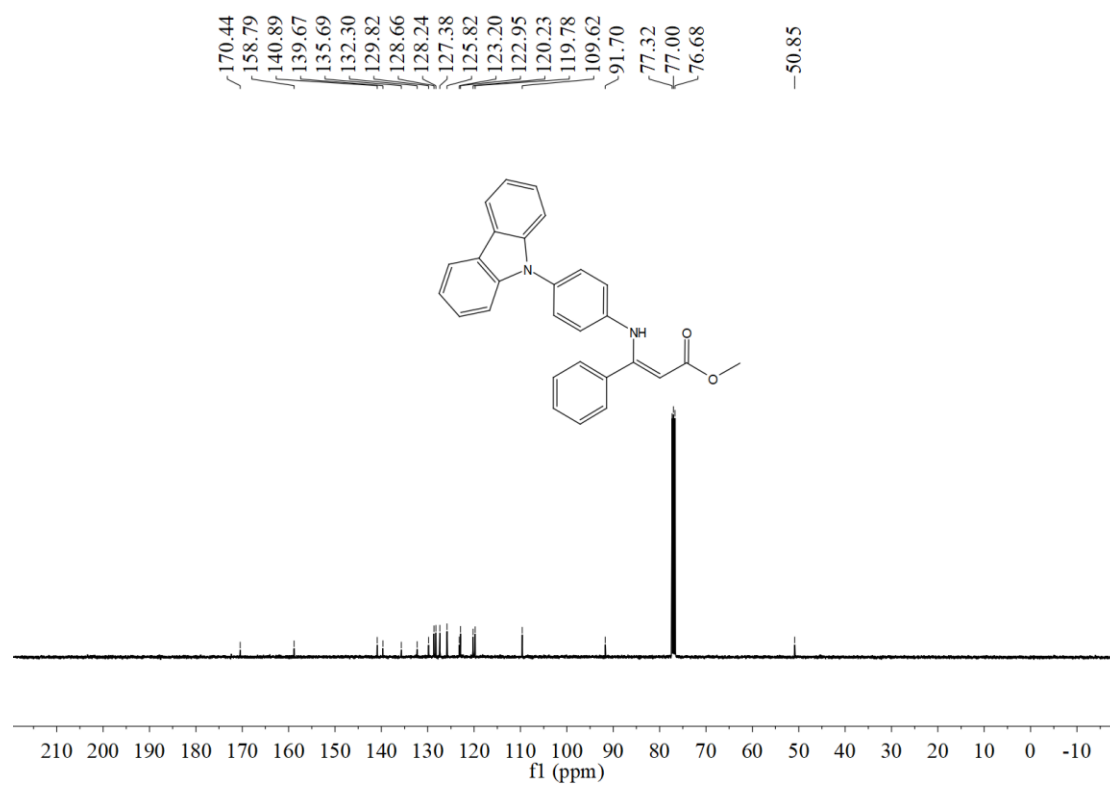



# SUPPORTING INFORMATION

## (Z)-N-(3-Methoxy-3-oxo-1-phenylprop-1-en-1-yl)-1-methyl-1H-indol-5-aminium (**3t**)

### <sup>1</sup>H NMR (400 MHz, CDCl<sub>3</sub>)

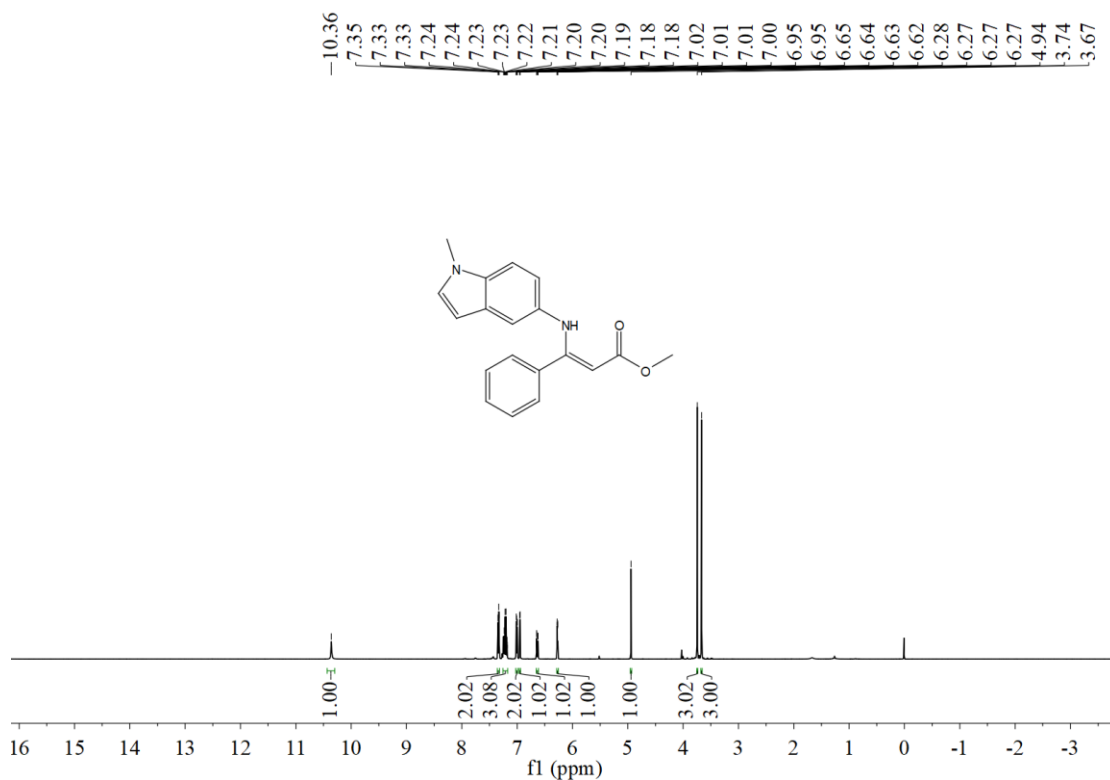

### <sup>13</sup>C NMR (100 MHz, CDCl<sub>3</sub>)

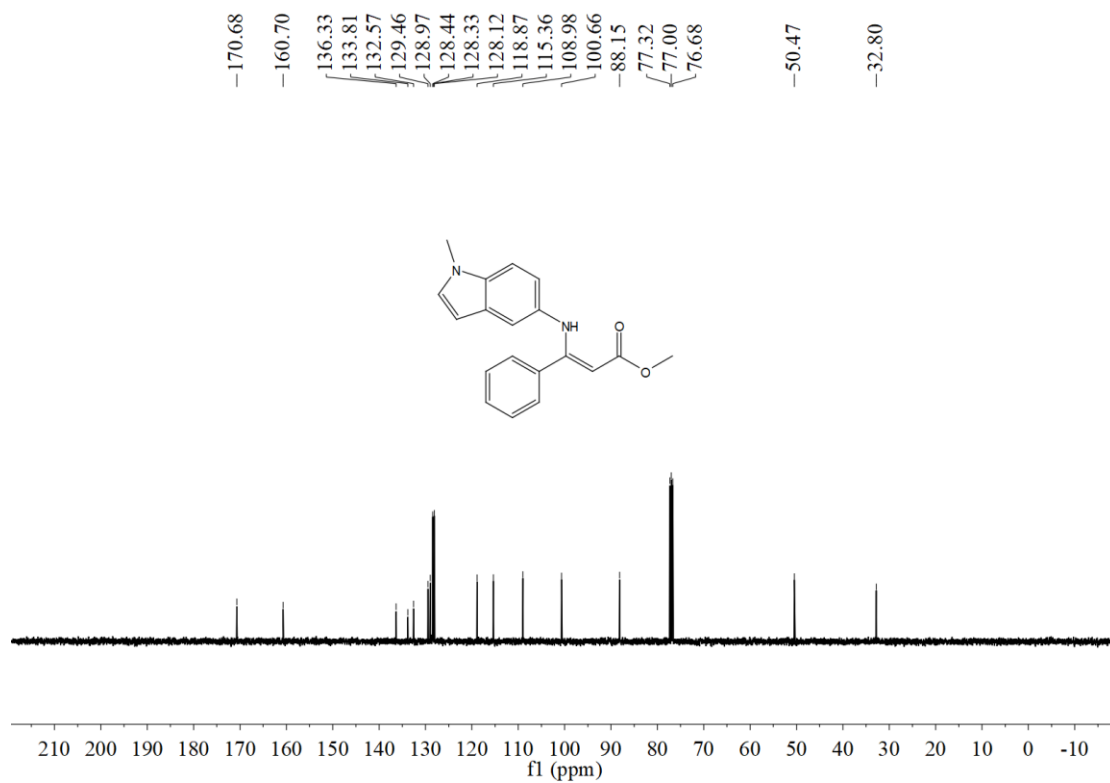

# SUPPORTING INFORMATION

## (Z)-6-Chloro-N-(3-methoxy-3-oxo-1-phenylprop-1-en-1-yl)pyridin-3-aminium (**3u**)

### $^1\text{H NMR}$ (400 MHz, $\text{CDCl}_3$ )

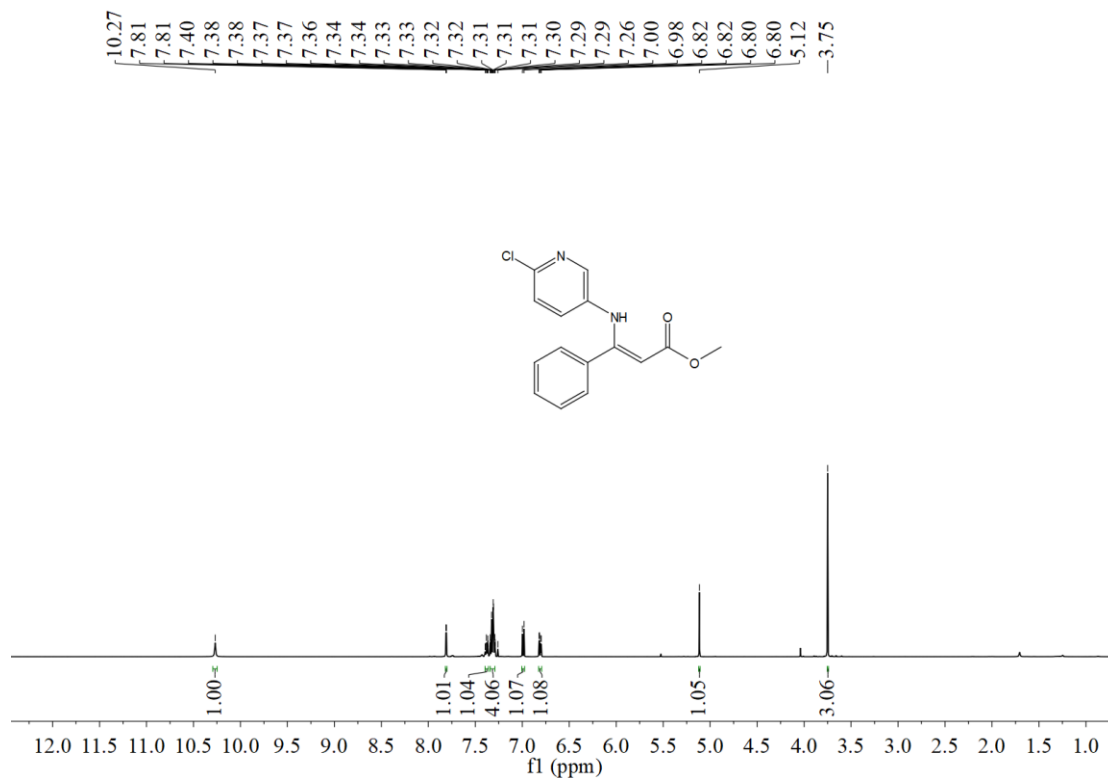

### $^{13}\text{C NMR}$ (100 MHz, $\text{CDCl}_3$ )

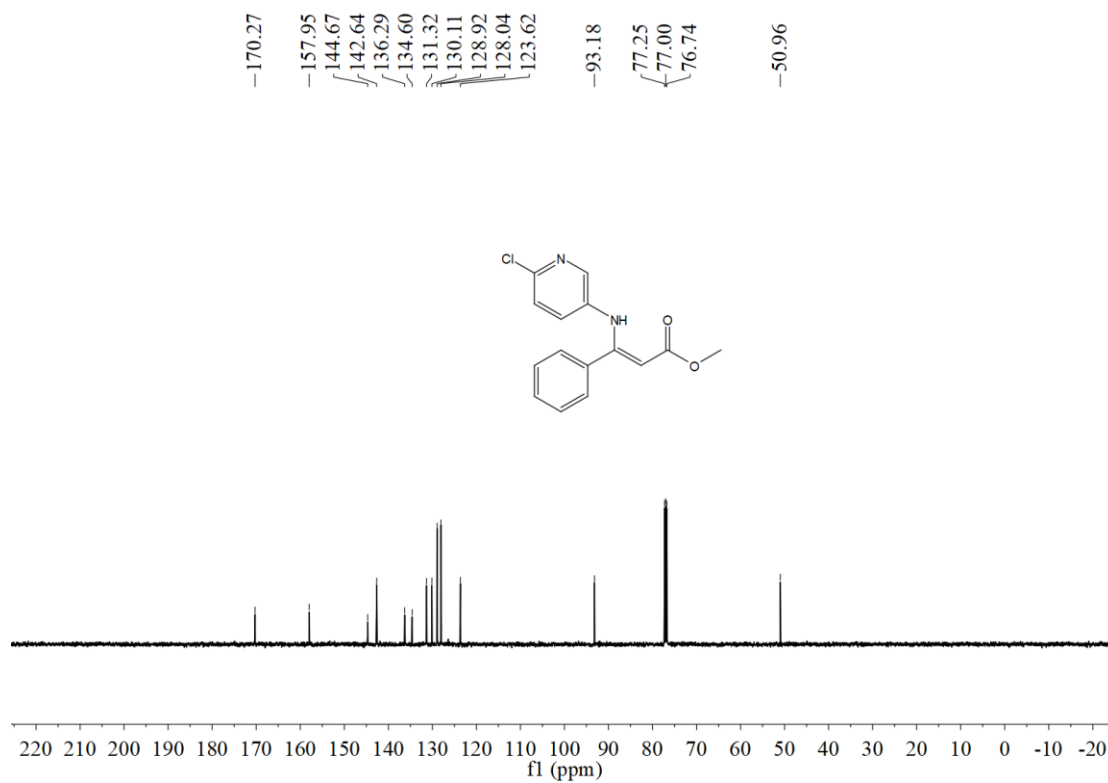

# SUPPORTING INFORMATION

## (*Z*)-*N*-(3-Methoxy-3-oxo-1-phenylprop-1-en-1-yl)thiophen-3-aminium (**3v**)

<sup>1</sup>H NMR (400 MHz, CDCl<sub>3</sub>)

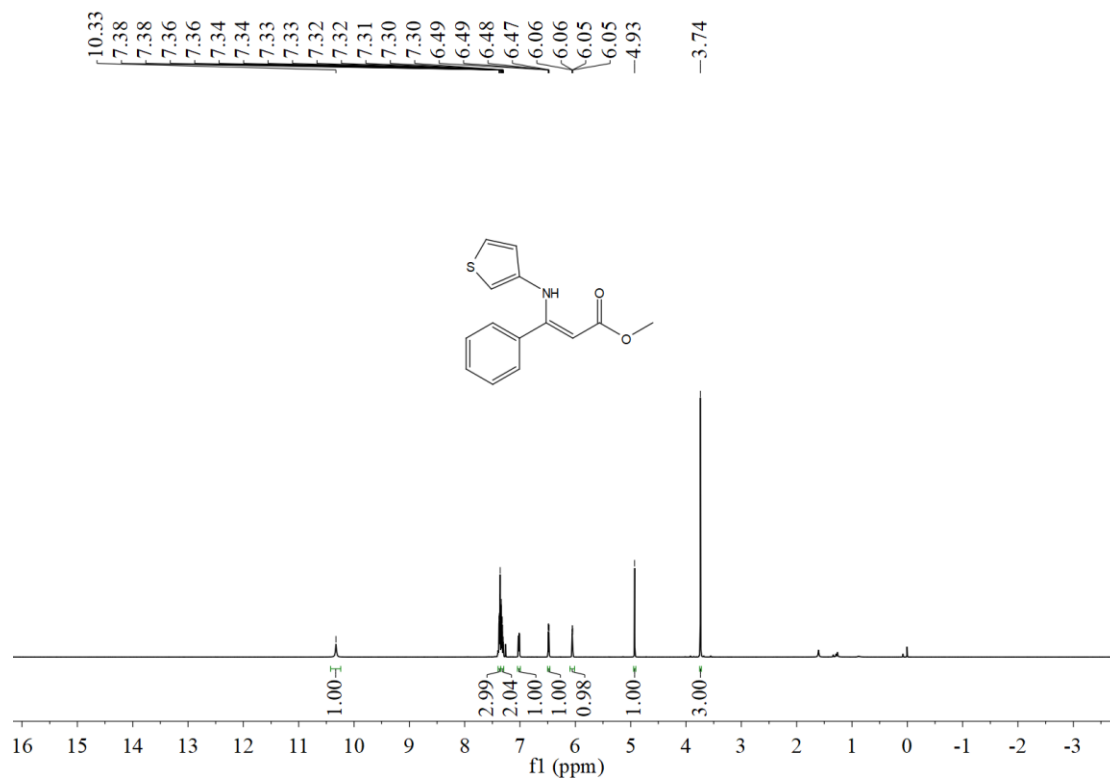

<sup>13</sup>C NMR (100 MHz, CDCl<sub>3</sub>)

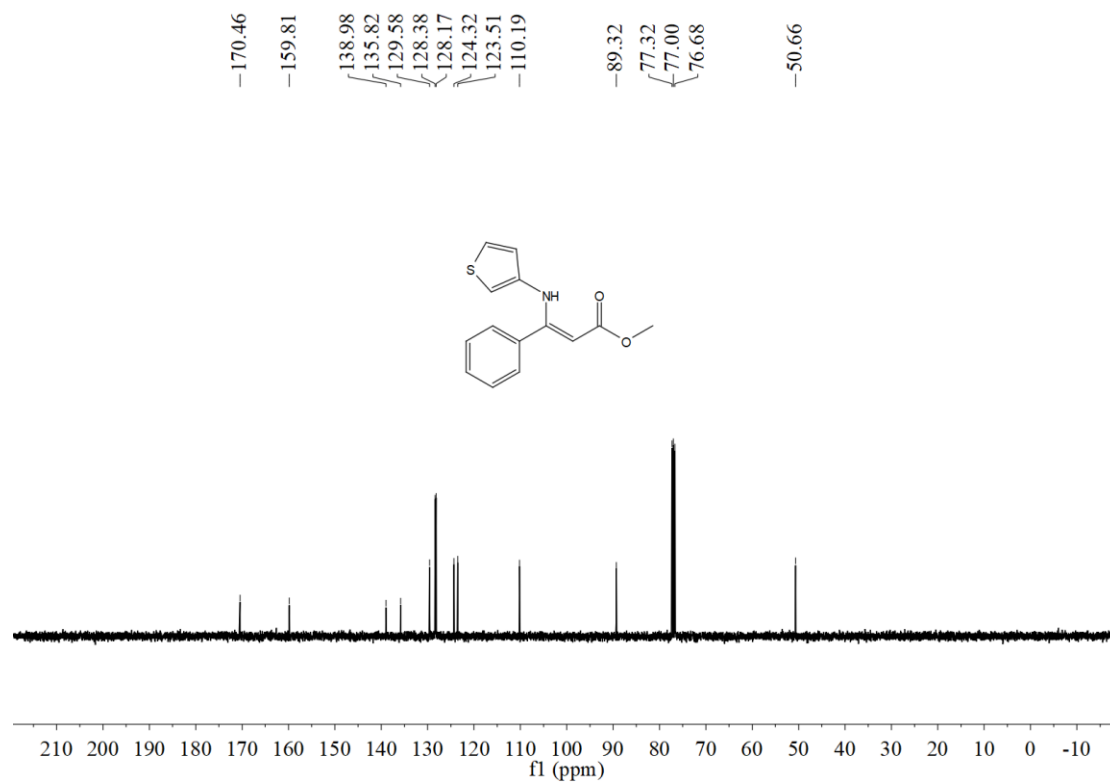

# SUPPORTING INFORMATION

## (*Z*)-*N*-(3-Methoxy-3-oxo-1-phenylprop-1-en-1-yl)benzo[*b*]thiophen-2-aminium (**3w**)

### <sup>1</sup>H NMR (400 MHz, CDCl<sub>3</sub>)

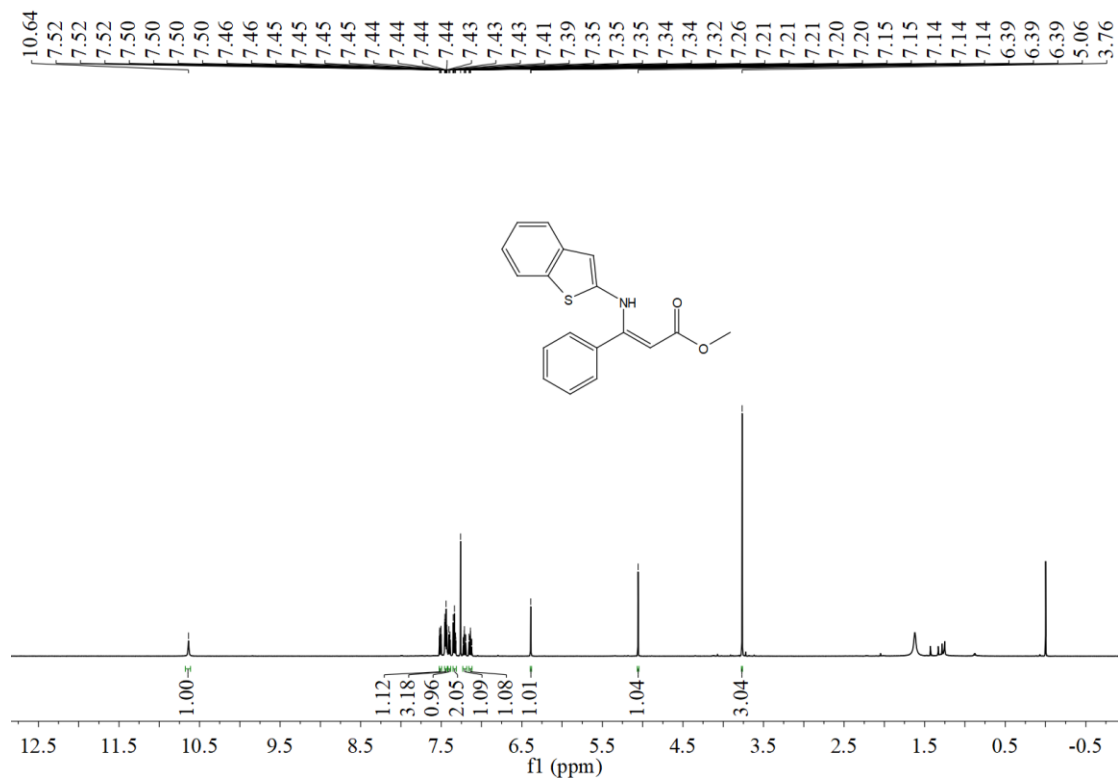

### <sup>13</sup>C NMR (100 MHz, CDCl<sub>3</sub>)

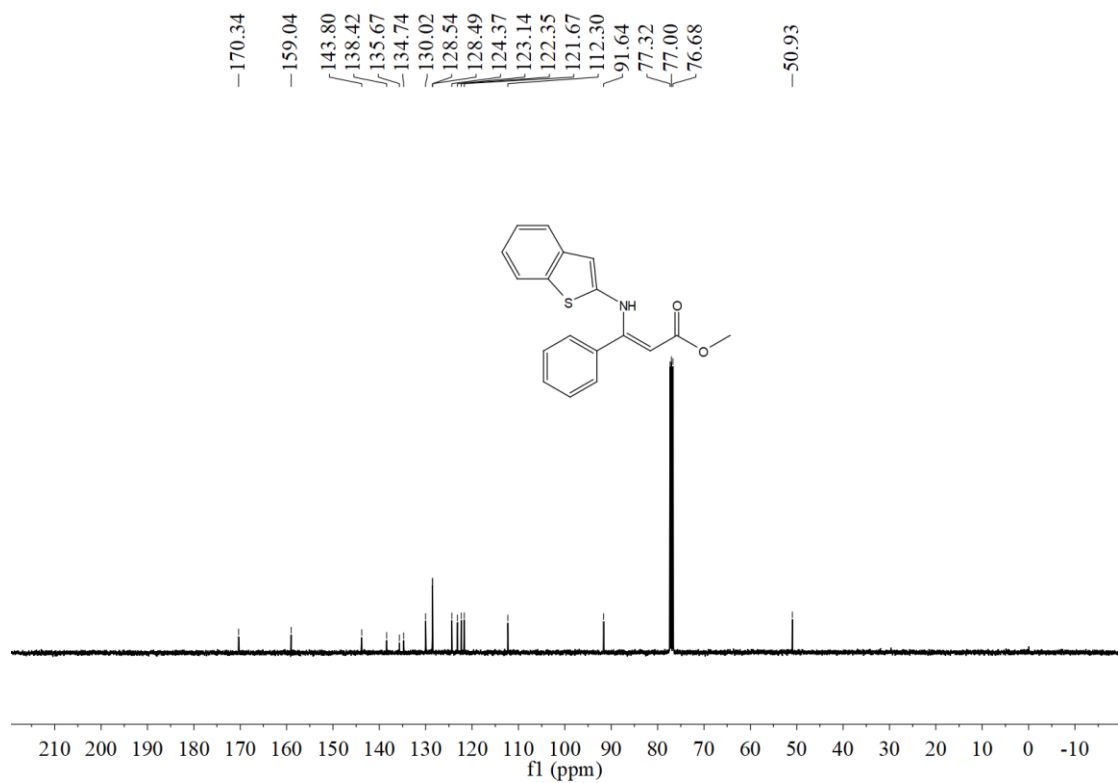

# SUPPORTING INFORMATION

## (Z)-N-(3-Methoxy-3-oxo-1-phenylprop-1-en-1-yl)dibenzo[b,d]thiophen-2-aminium (**3x**)

### $^1\text{H NMR}$ (400 MHz, $\text{CDCl}_3$ )

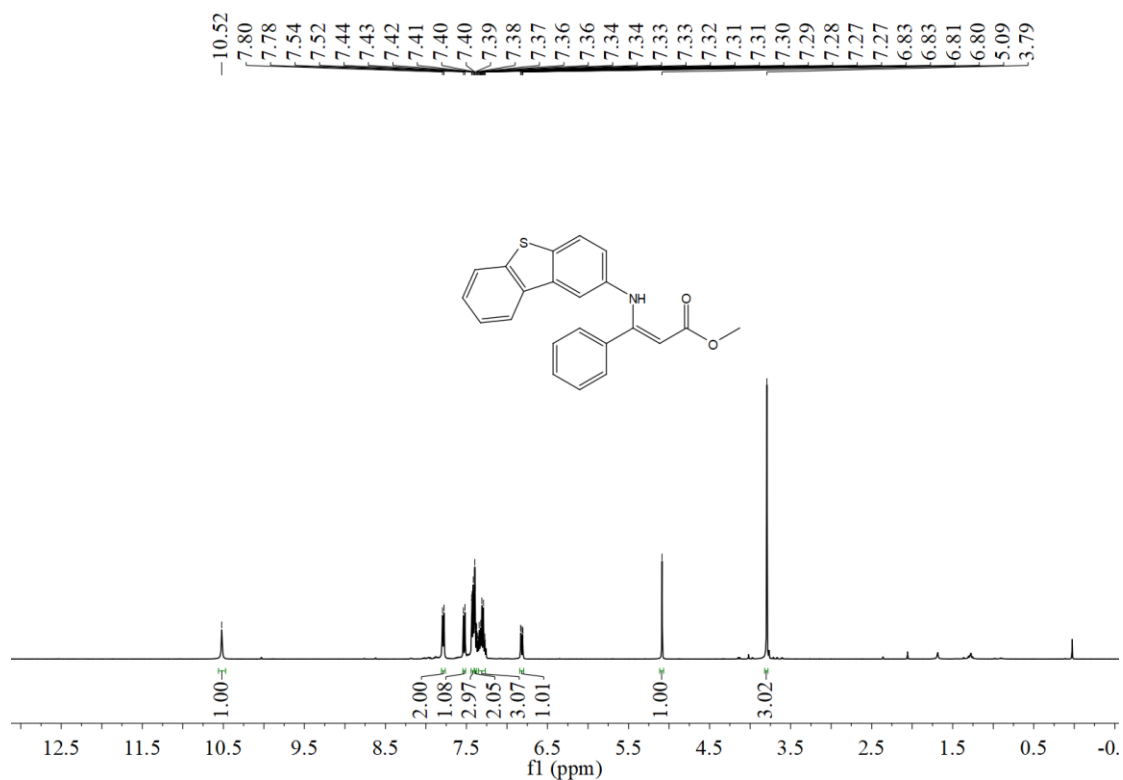

### $^{13}\text{C NMR}$ (100 MHz, $\text{CDCl}_3$ )

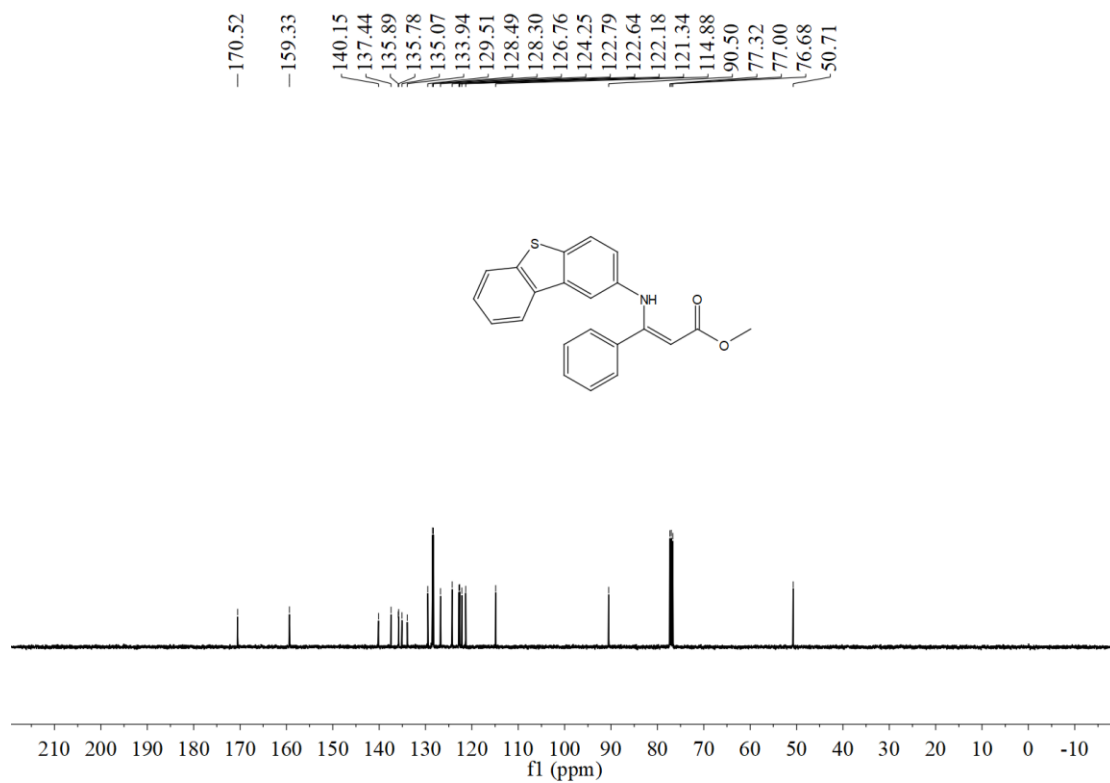

# SUPPORTING INFORMATION

## Methyl (*Z*)-3-(dibenzo[*b,d*]thiophen-4-ylamino)-3-phenylacrylate (**3y**)

### <sup>1</sup>H NMR (400 MHz, CDCl<sub>3</sub>)

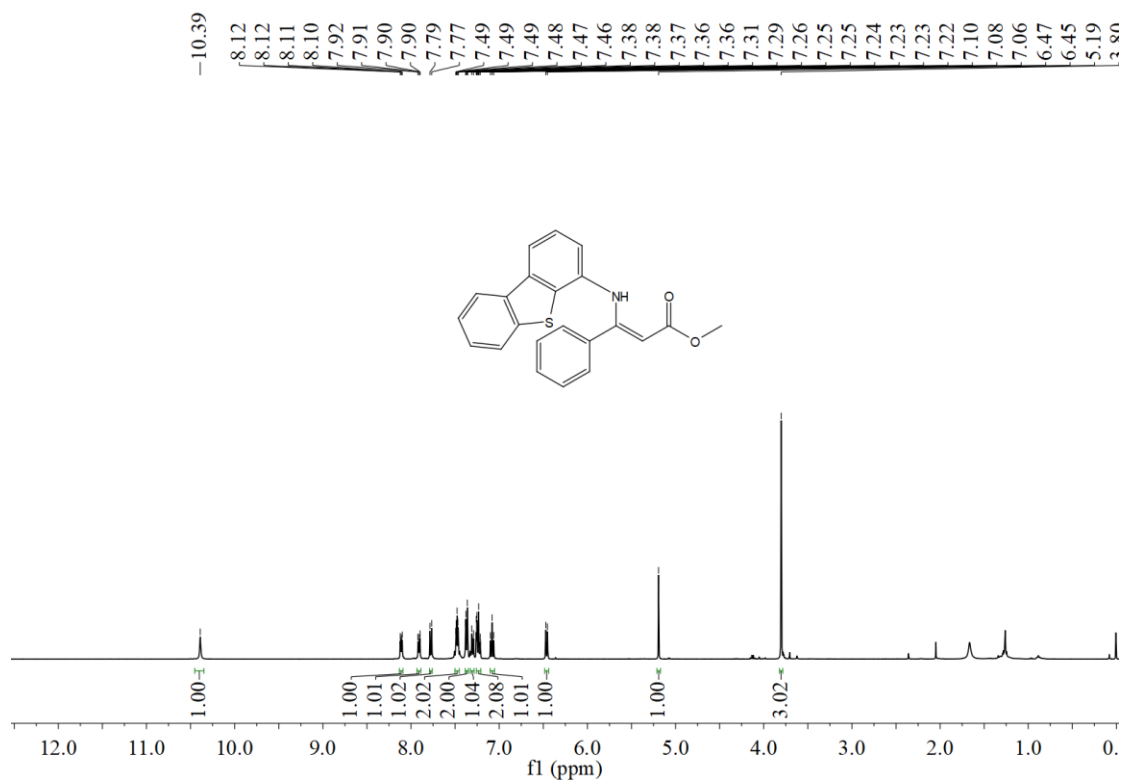

### <sup>13</sup>C NMR (100 MHz, CDCl<sub>3</sub>)

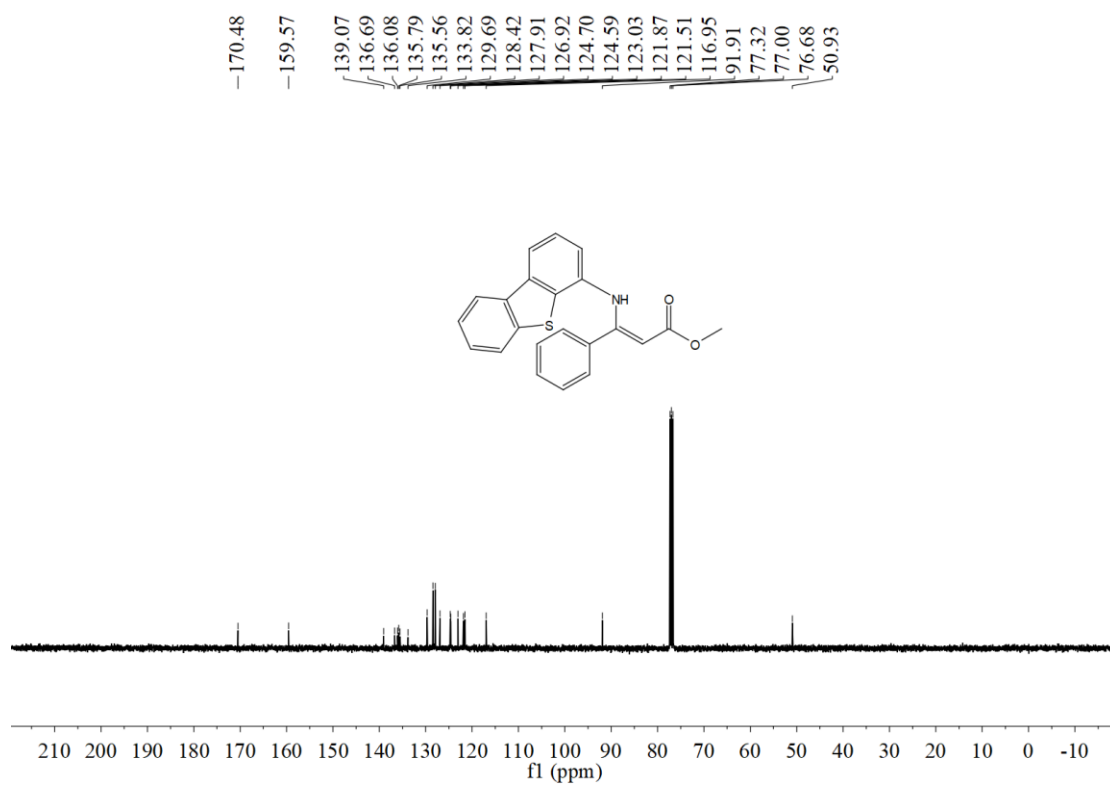

# SUPPORTING INFORMATION

## (Z)-3-Methoxy-3-oxo-1-phenyl-N-((E)-styryl)prop-1-en-1-aminium (**3z**)

<sup>1</sup>H NMR (400 MHz, CDCl<sub>3</sub>)

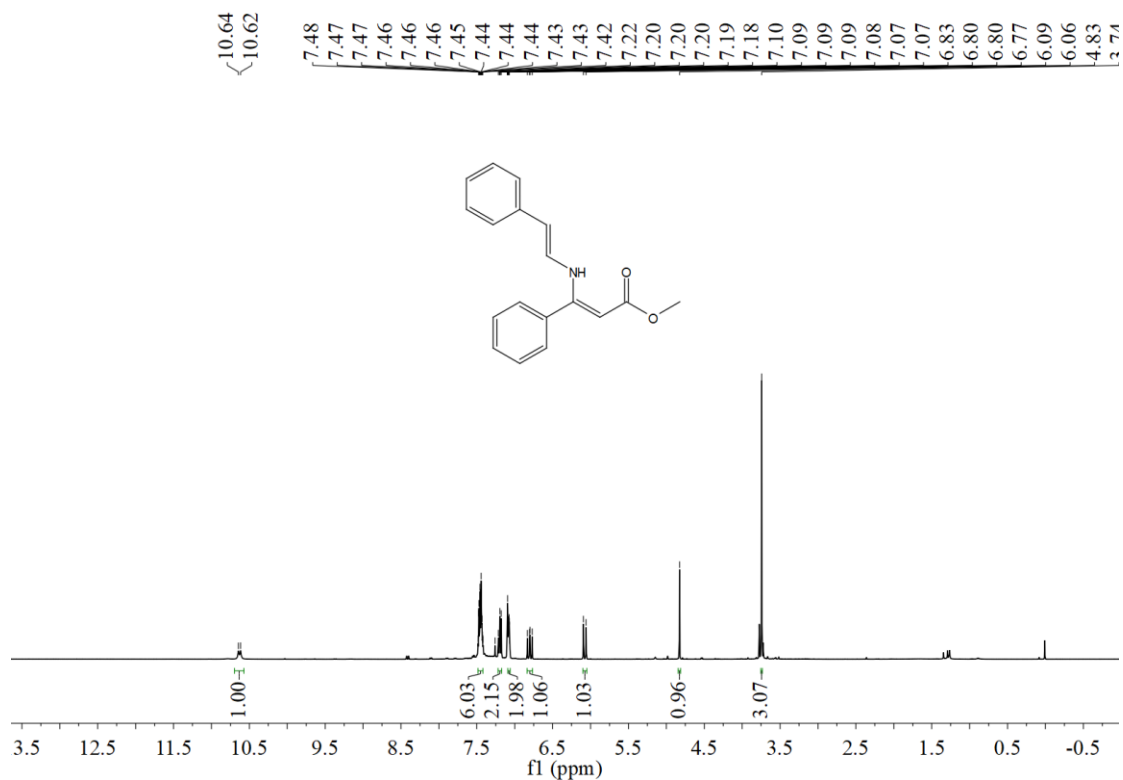

<sup>13</sup>C NMR (100 MHz, CDCl<sub>3</sub>)

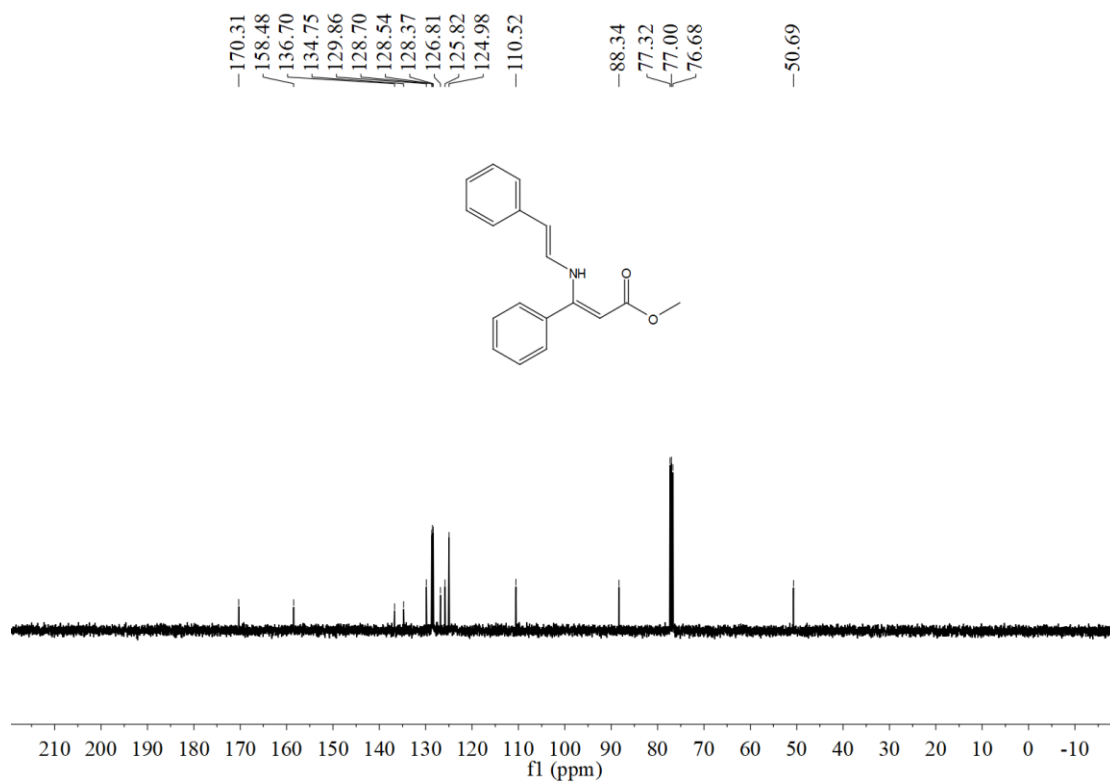

# SUPPORTING INFORMATION

## Methyl (*Z*)-2-methyl-3-phenyl-3-(phenylamino)acrylate (**3aa**)

<sup>1</sup>H NMR (400 MHz, CDCl<sub>3</sub>)

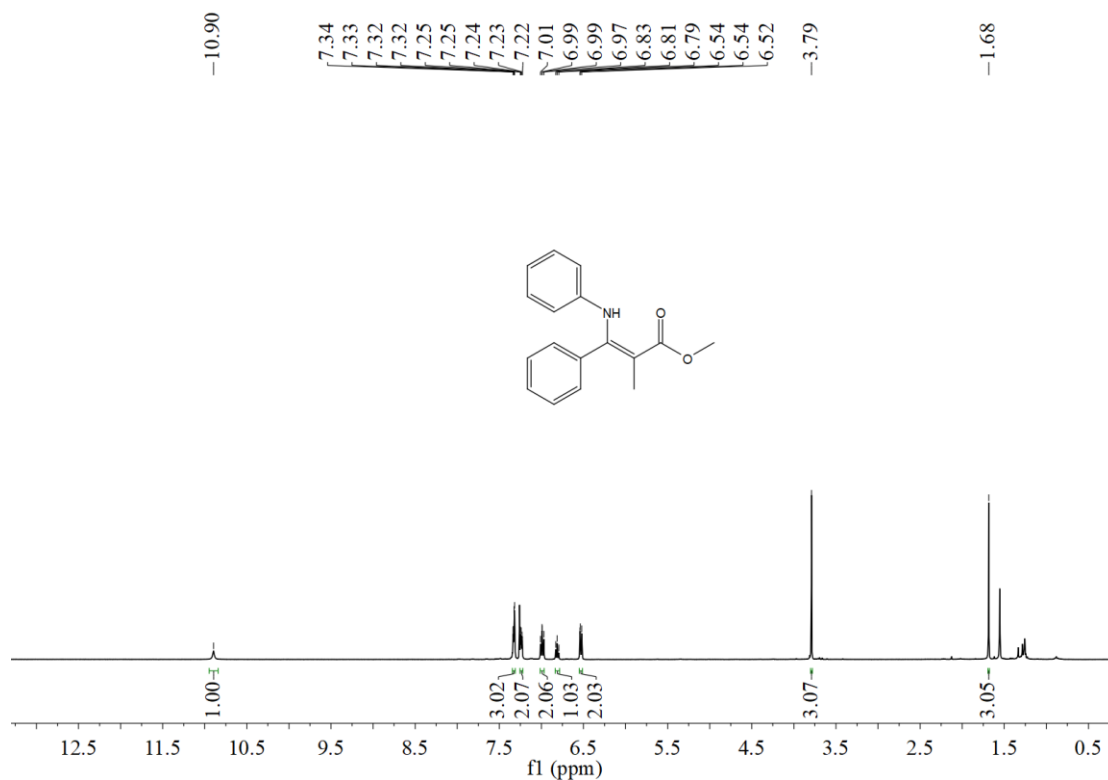

<sup>13</sup>C NMR (100 MHz, CDCl<sub>3</sub>)

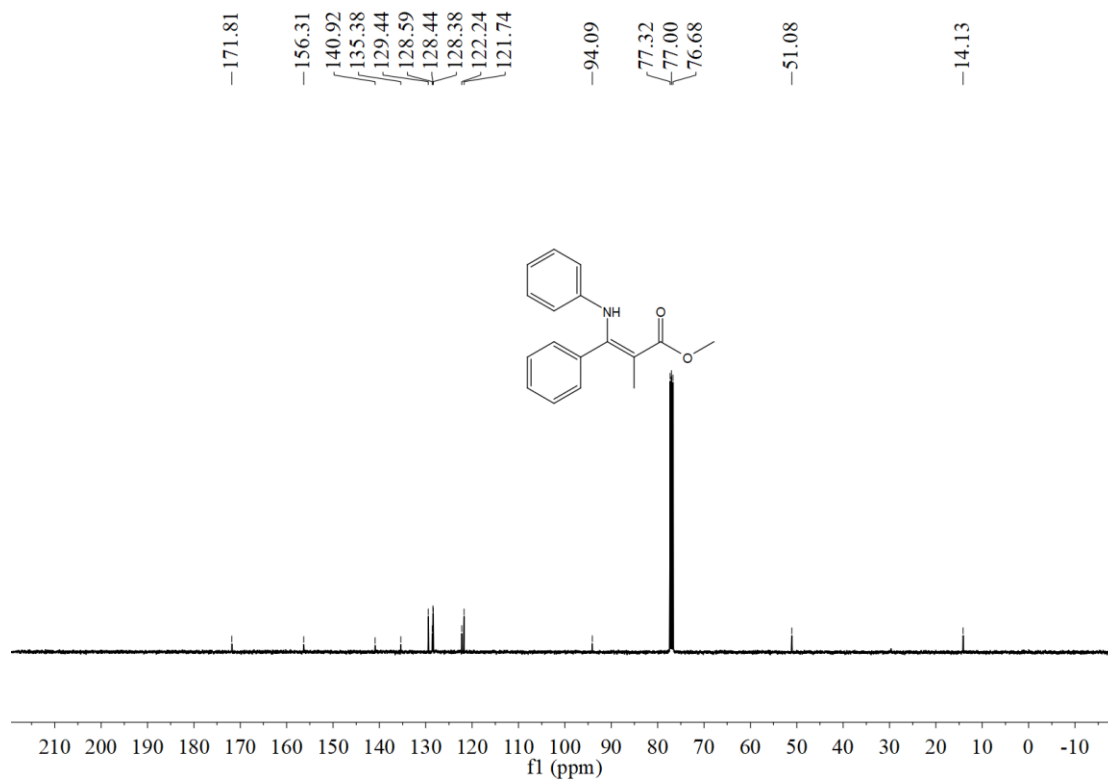



# SUPPORTING INFORMATION

## Methyl (Z)-2-bromo-3-phenyl-3-(phenylamino)acrylate (**3ab**)

$^1\text{H NMR}$  (400 MHz,  $\text{CDCl}_3$ )

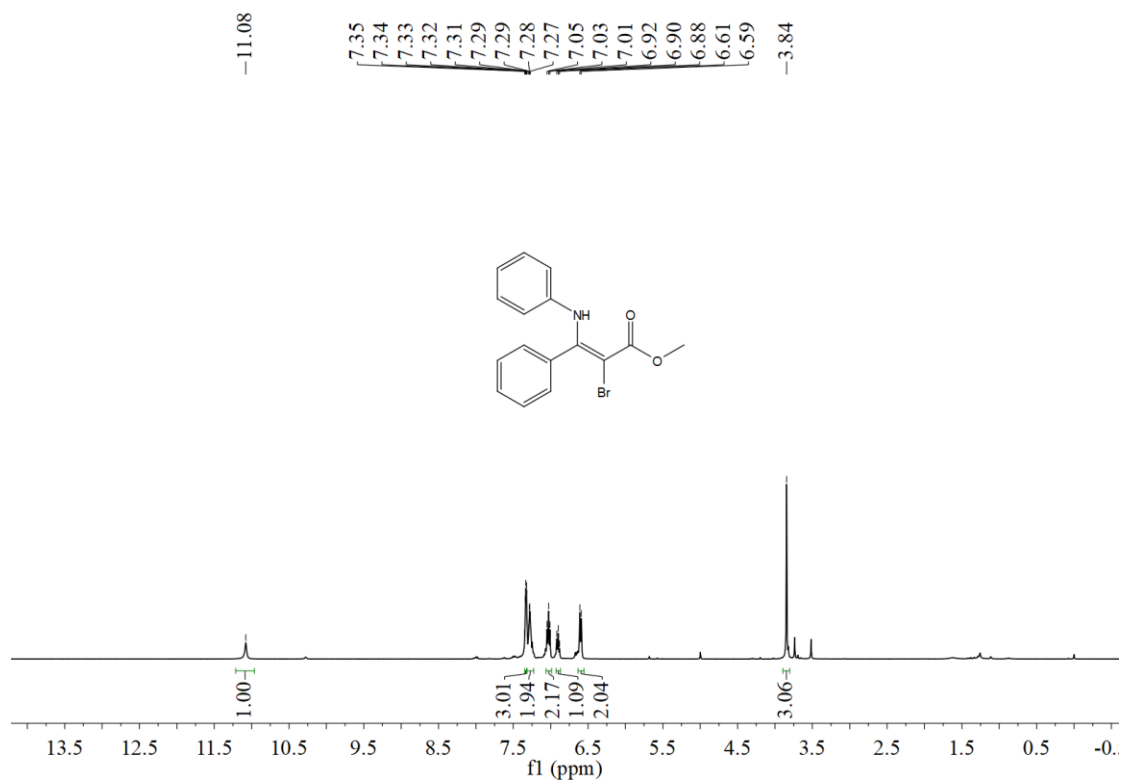

$^{13}\text{C NMR}$  (100 MHz,  $\text{CDCl}_3$ )

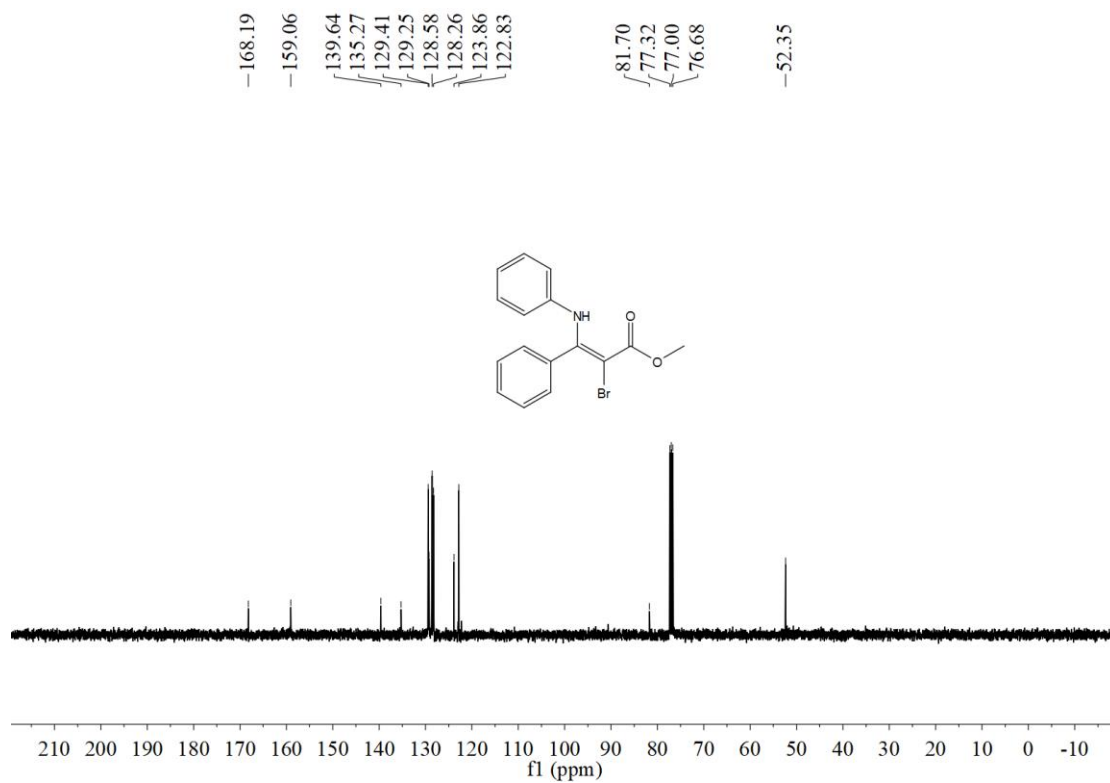

# SUPPORTING INFORMATION

## Methyl (*Z*)-3-(4-methoxyphenyl)-3-(phenylamino)acrylate (**3ac**)

<sup>1</sup>H NMR (400 MHz, CDCl<sub>3</sub>)

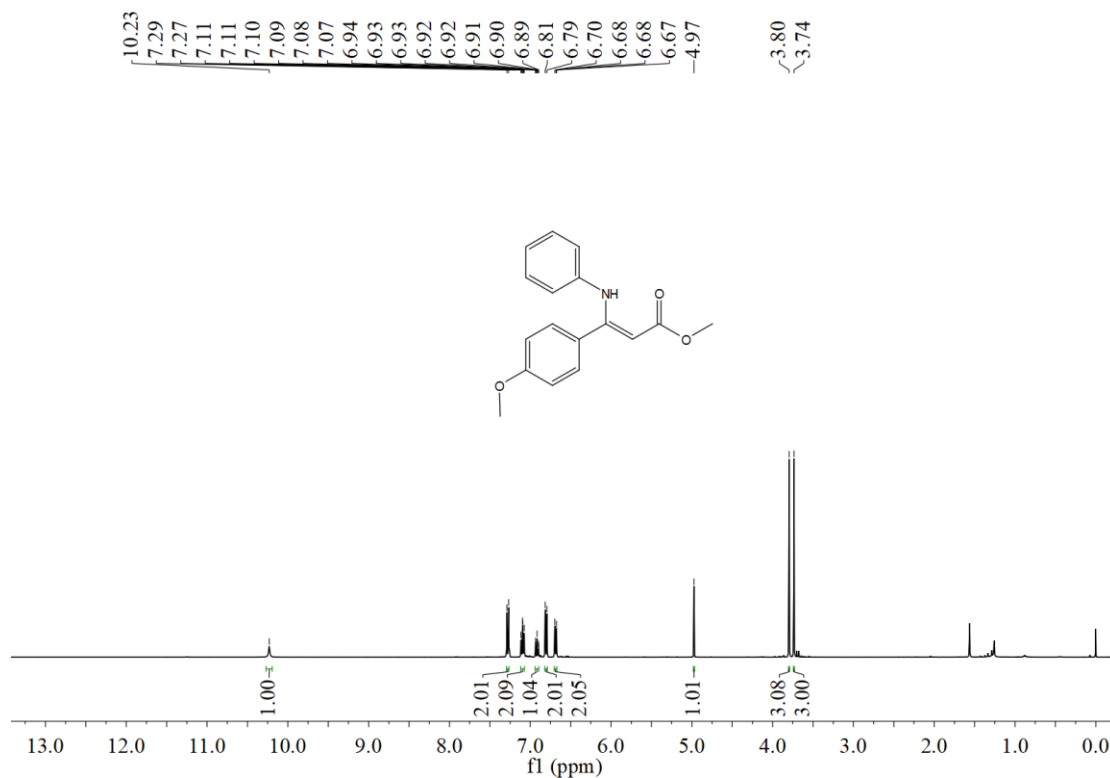

<sup>13</sup>C NMR (100 MHz, CDCl<sub>3</sub>)

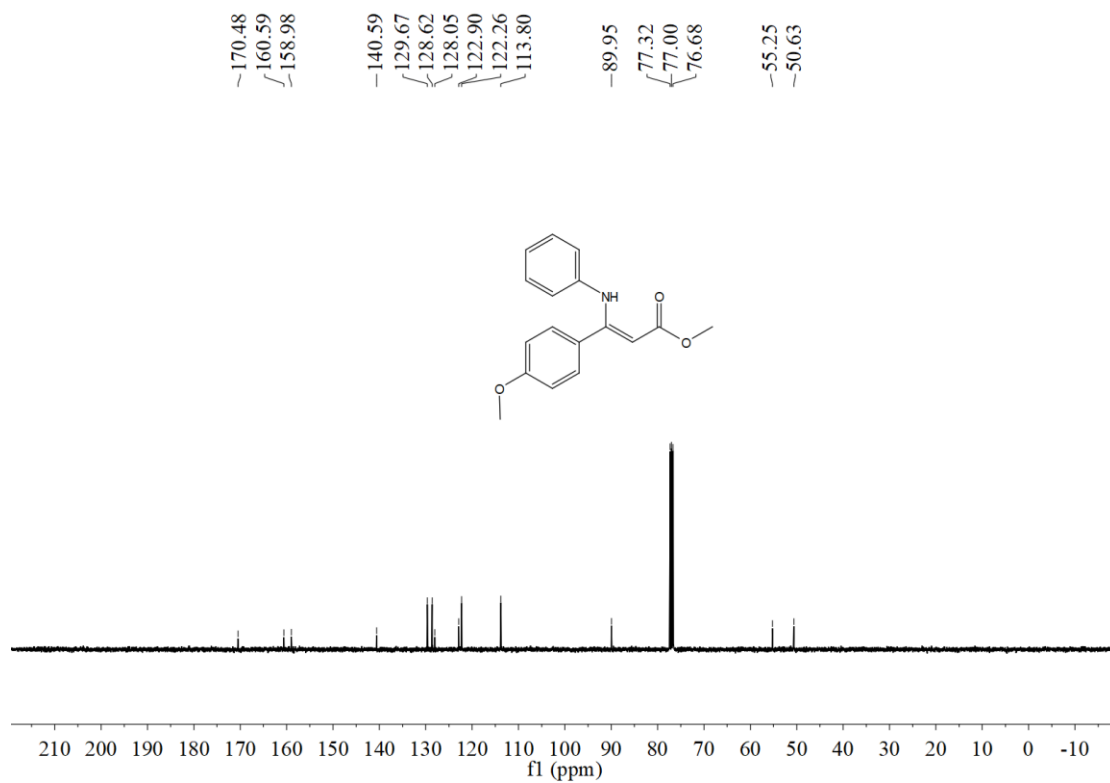

# SUPPORTING INFORMATION

## Benzyl (Z)-3-phenyl-3-(phenylamino)acrylate (**3ad**)

<sup>1</sup>H NMR (400 MHz, CDCl<sub>3</sub>)

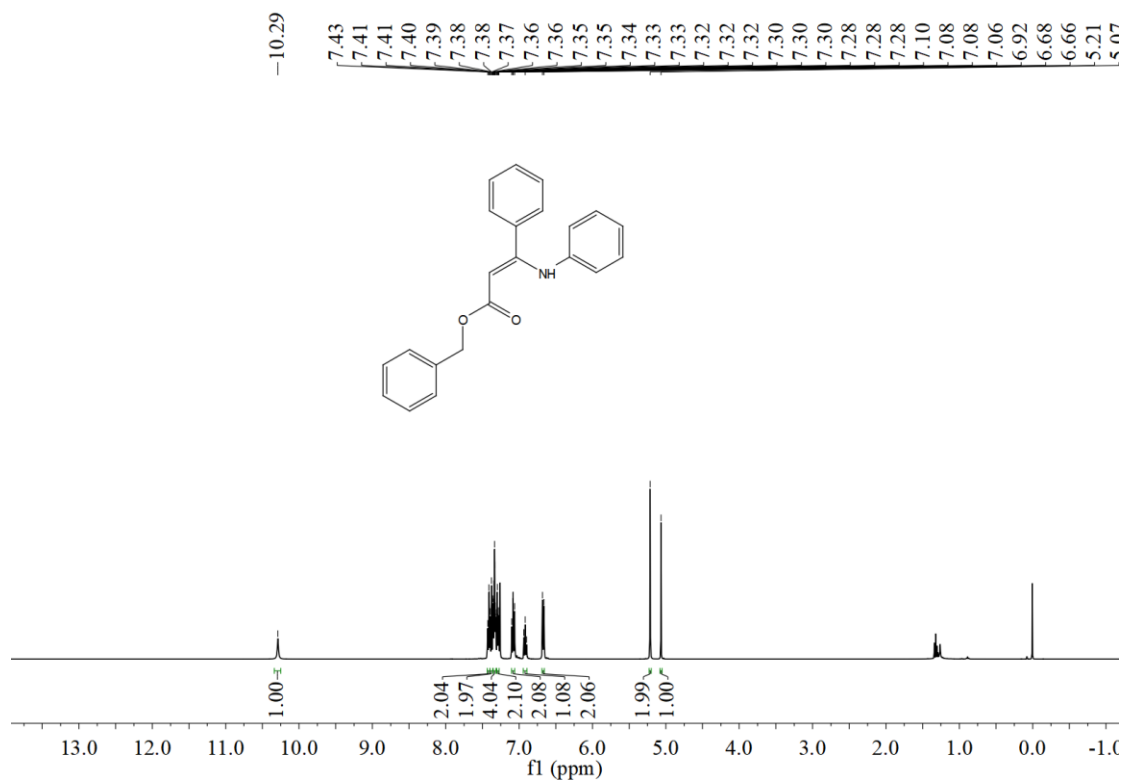

<sup>13</sup>C NMR (100 MHz, CDCl<sub>3</sub>)

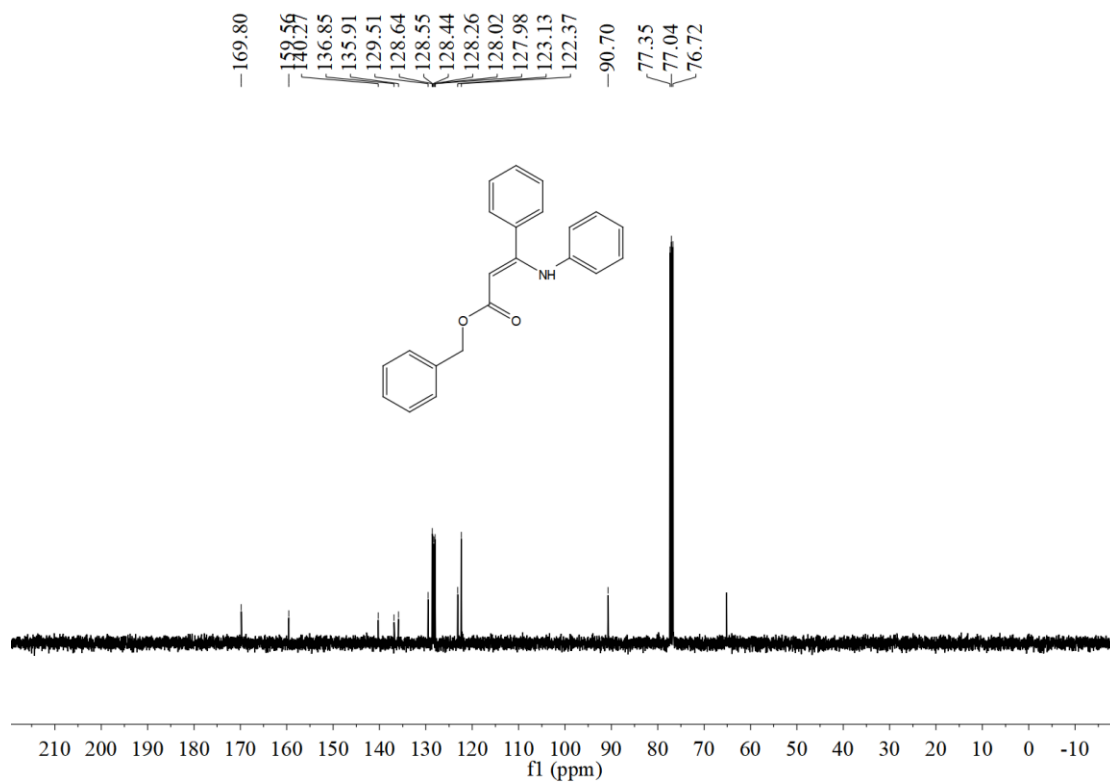

# SUPPORTING INFORMATION

## Phenyl (*Z*)-3-phenyl-3-(phenylamino)acrylate (**3ae**)

$^1\text{H NMR}$  (400 MHz,  $\text{CDCl}_3$ )

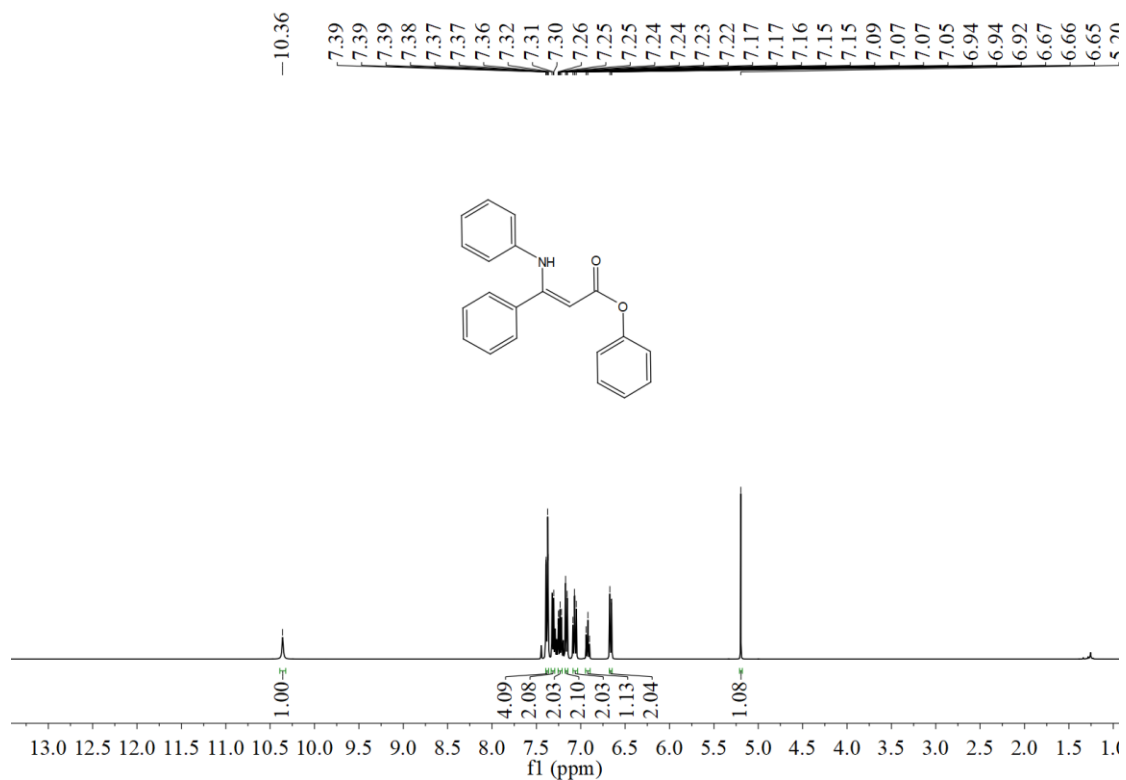

$^{13}\text{C NMR}$  (100 MHz,  $\text{CDCl}_3$ )

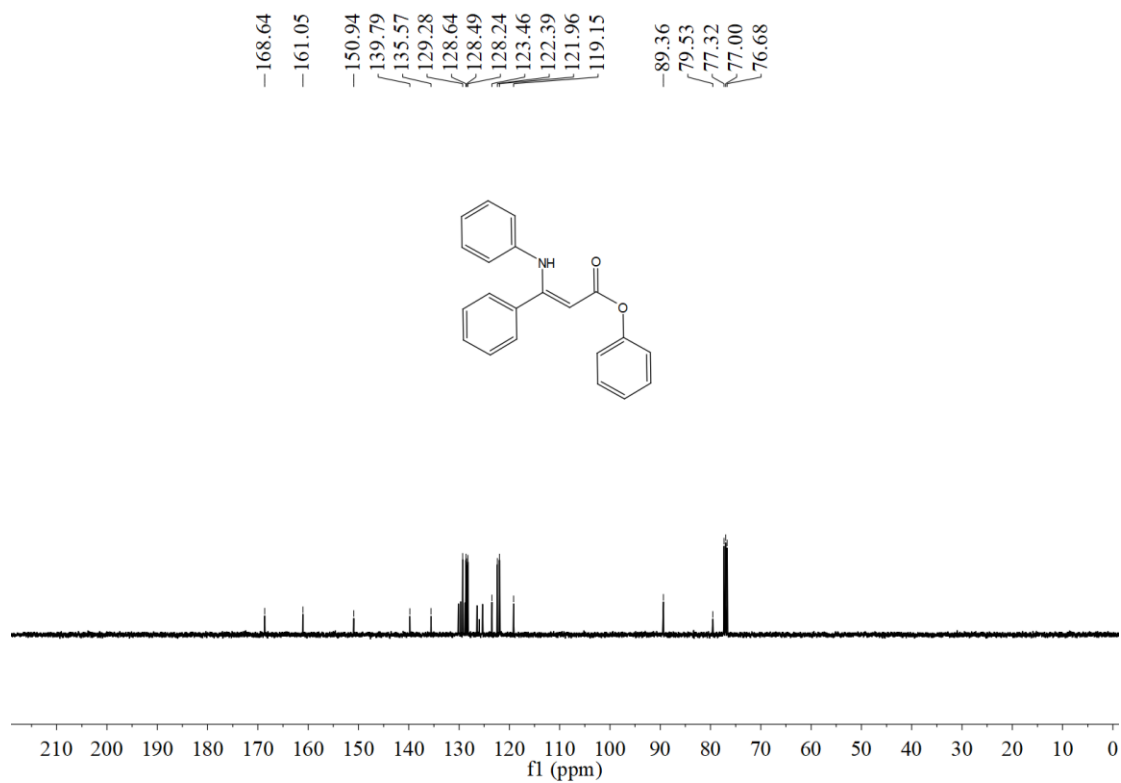

# SUPPORTING INFORMATION

## 4-Methoxyphenyl (*Z*)-3-phenyl-3-(phenylamino)acrylate (**3af**)

<sup>1</sup>H NMR (400 MHz, CDCl<sub>3</sub>)

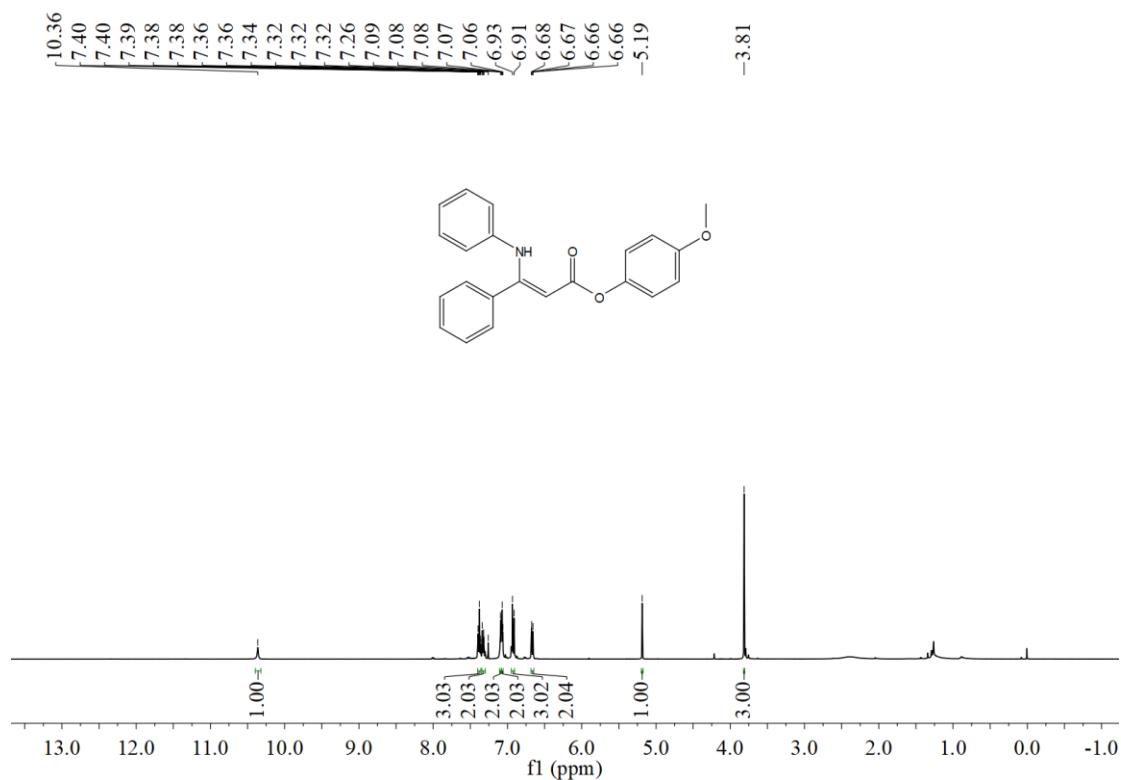

<sup>13</sup>C NMR (100 MHz, CDCl<sub>3</sub>)

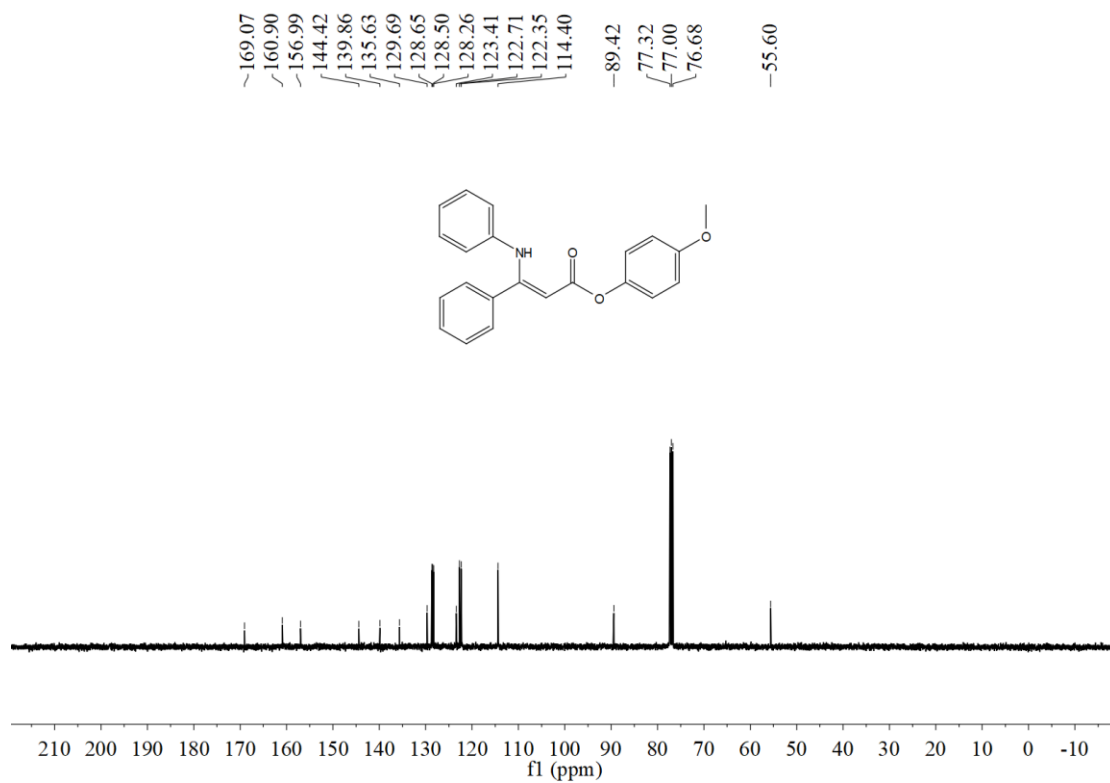

# SUPPORTING INFORMATION

## Methyl 5-methyl-1,2-diphenyl-1H-pyrrole-3-carboxylate (**4**)

$^1\text{H NMR}$  (400 MHz,  $\text{CDCl}_3$ )

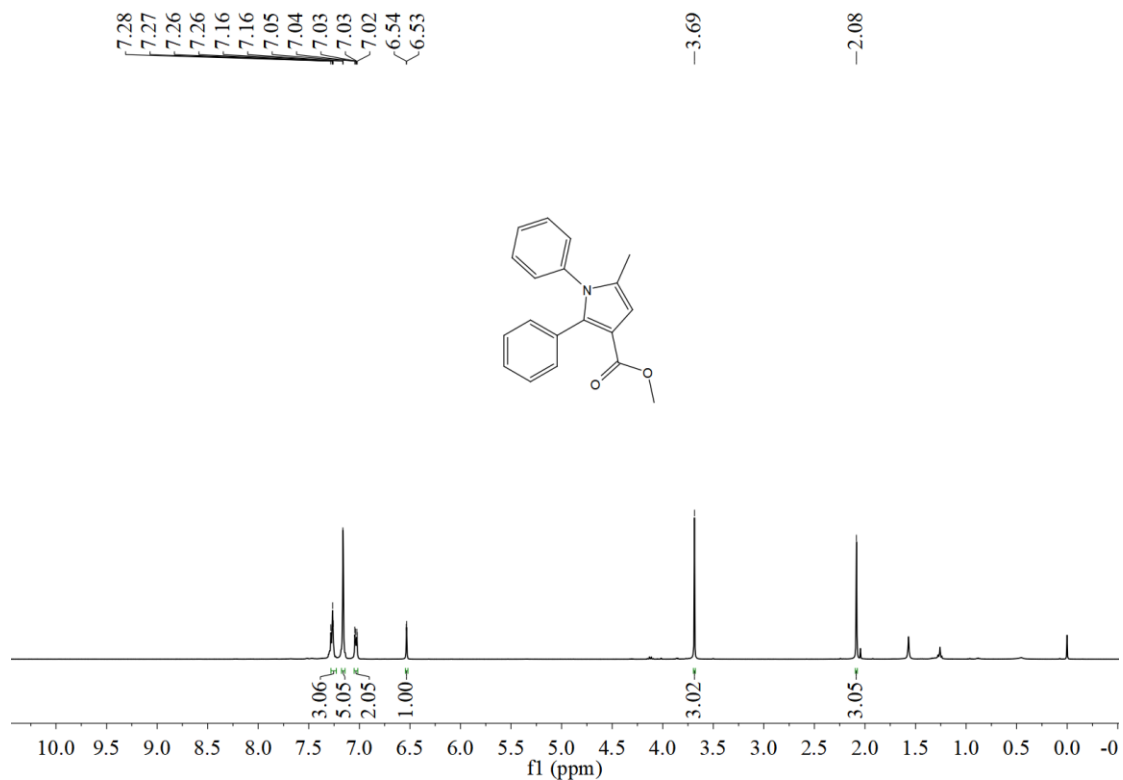

$^{13}\text{C NMR}$  (100 MHz,  $\text{CDCl}_3$ )

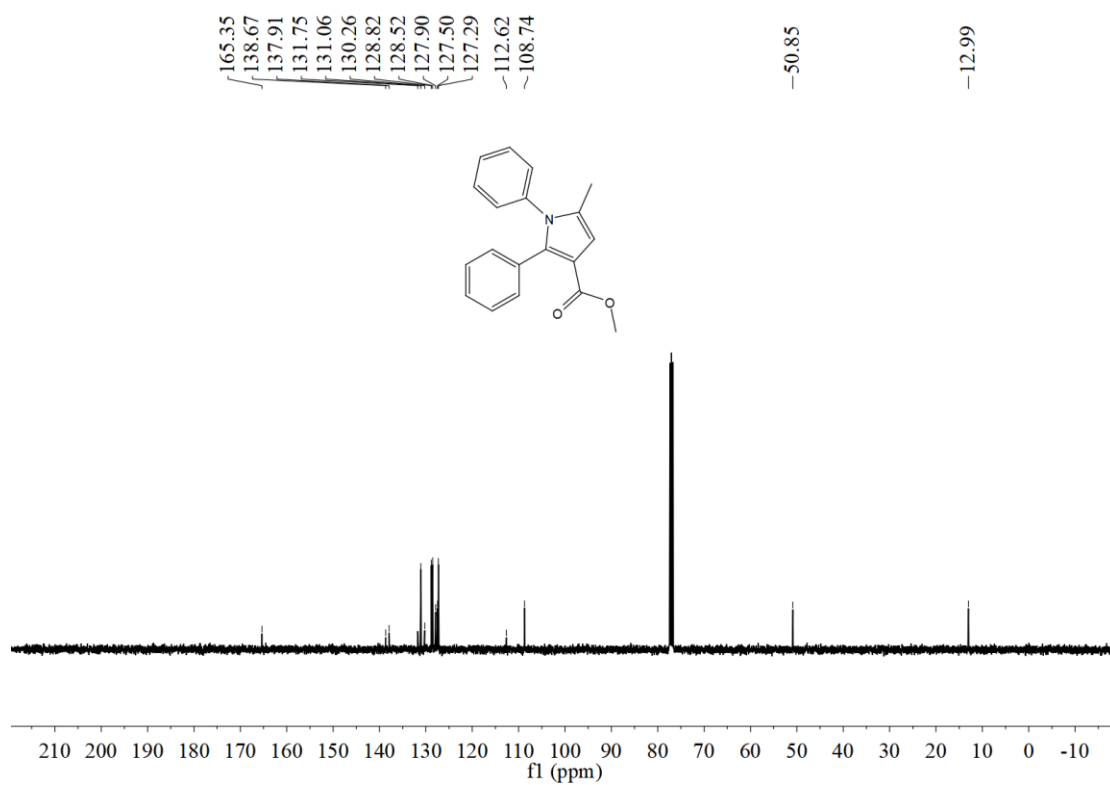

# SUPPORTING INFORMATION

## Methyl 3-methyl-1,5-diphenyl-1H-pyrazole-4-carboxylate (**5**)

<sup>1</sup>H NMR (400 MHz, CDCl<sub>3</sub>)

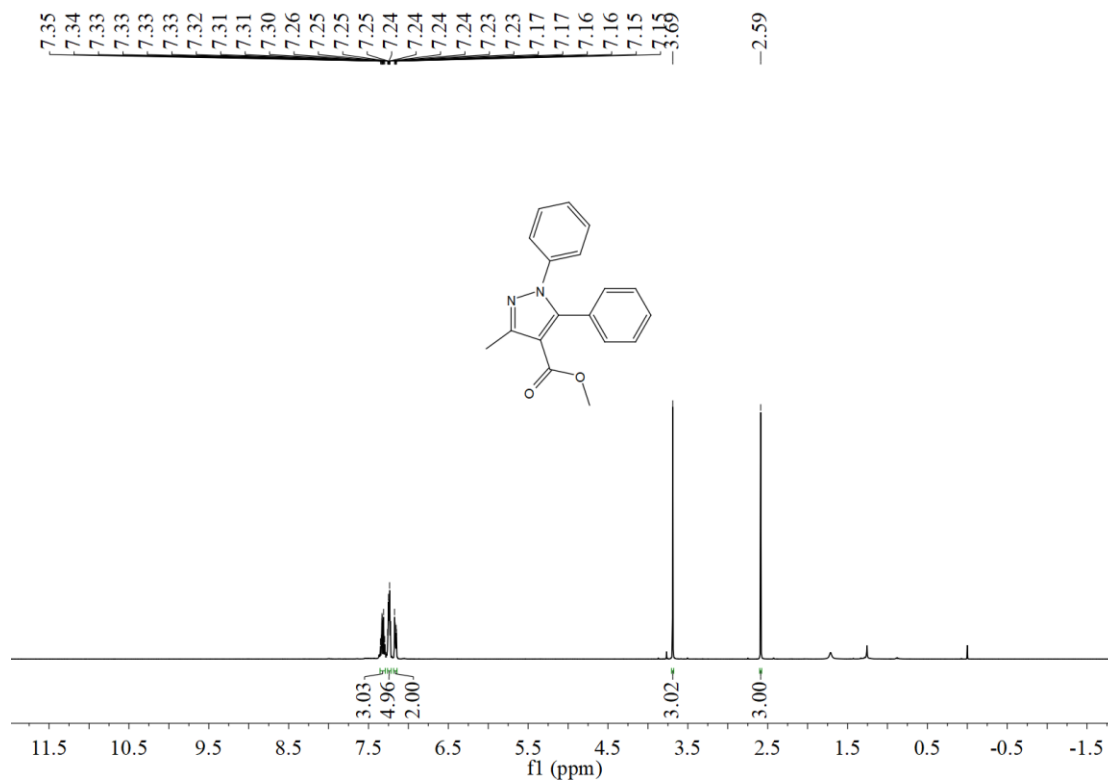

<sup>13</sup>C NMR (100 MHz, CDCl<sub>3</sub>)

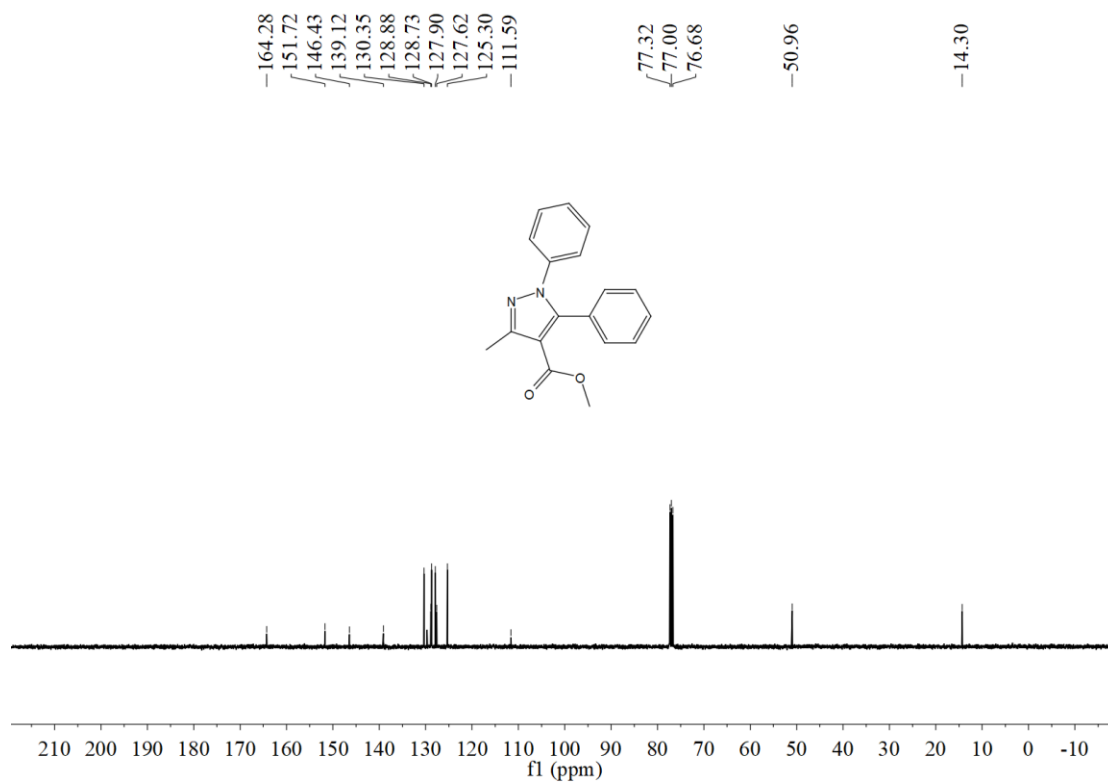

# SUPPORTING INFORMATION

## Methyl 2-phenyl-1H-indole-3-carboxylate (6)

$^1\text{H NMR}$  (400 MHz,  $\text{CDCl}_3$ )

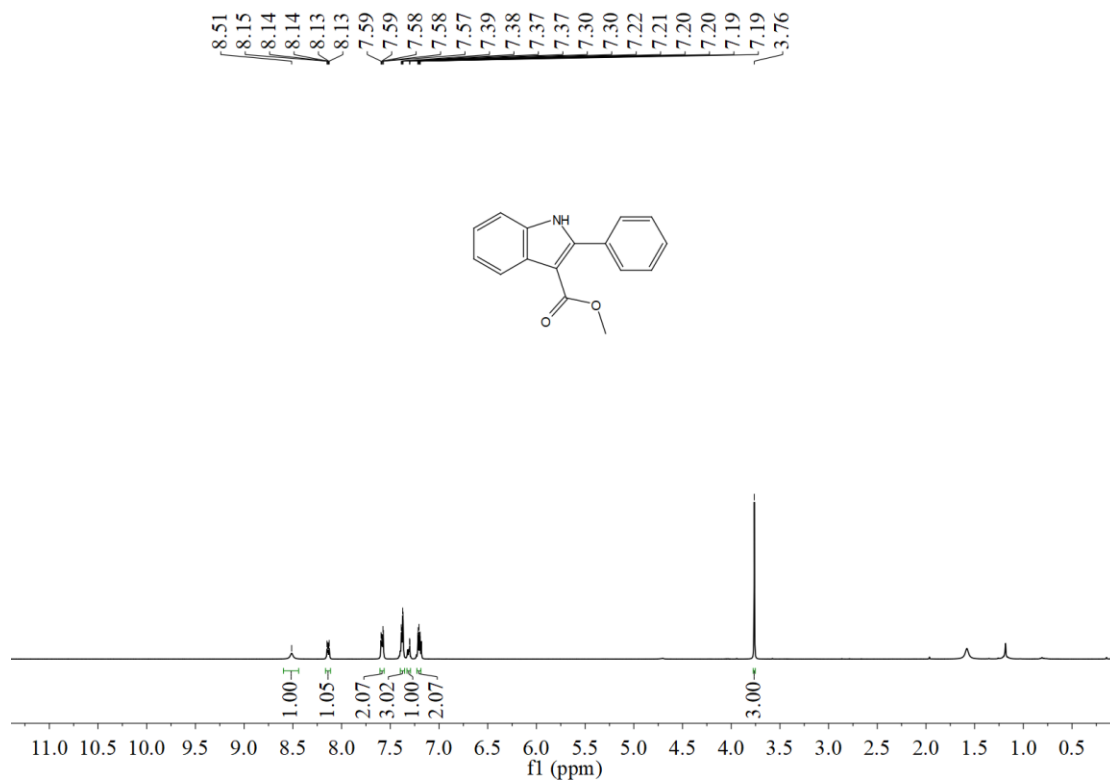

$^{13}\text{C NMR}$  (100 MHz,  $\text{CDCl}_3$ )

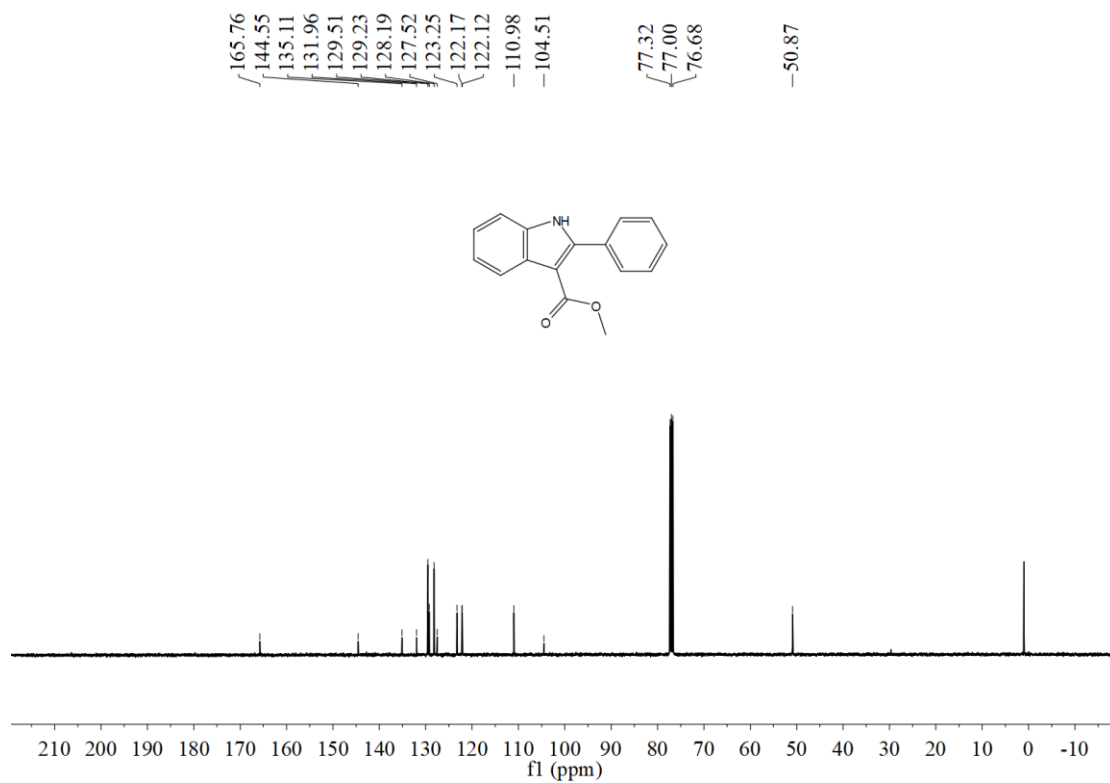



# SUPPORTING INFORMATION

## 3-(Methoxycarbonyl)-2-phenylquinolin-1-ium (7)

$^1\text{H NMR}$  (400 MHz,  $\text{CDCl}_3$ )

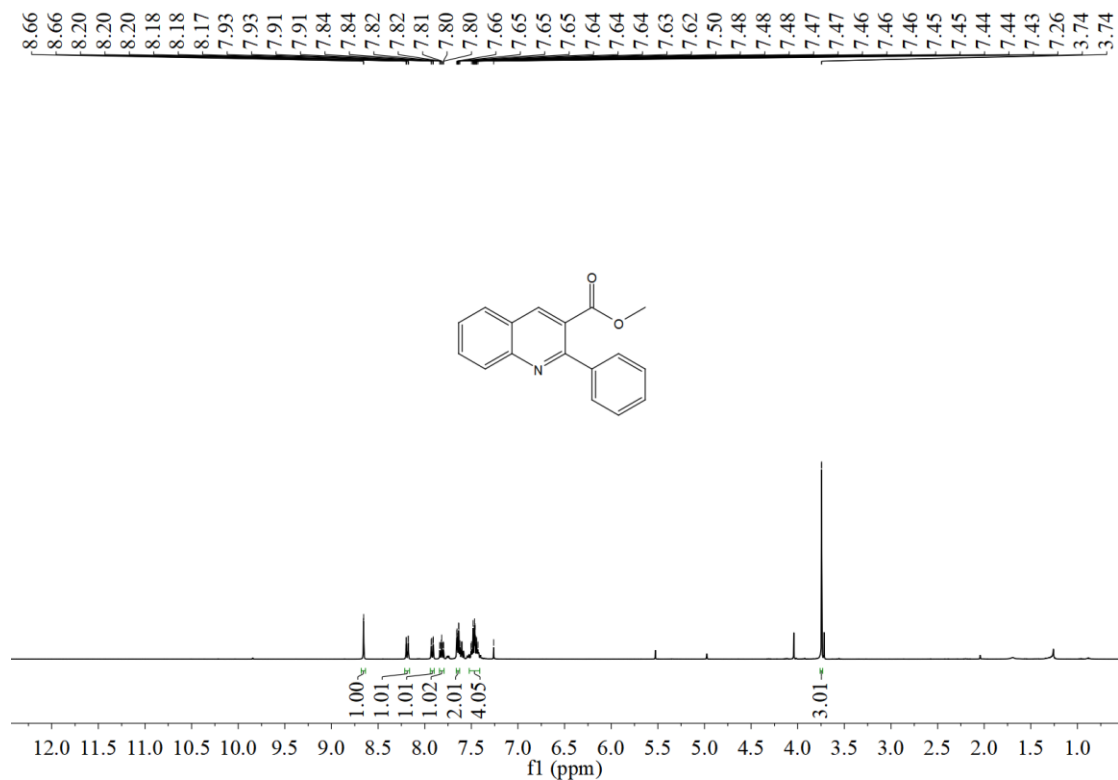

$^{13}\text{C NMR}$  (100 MHz,  $\text{CDCl}_3$ )

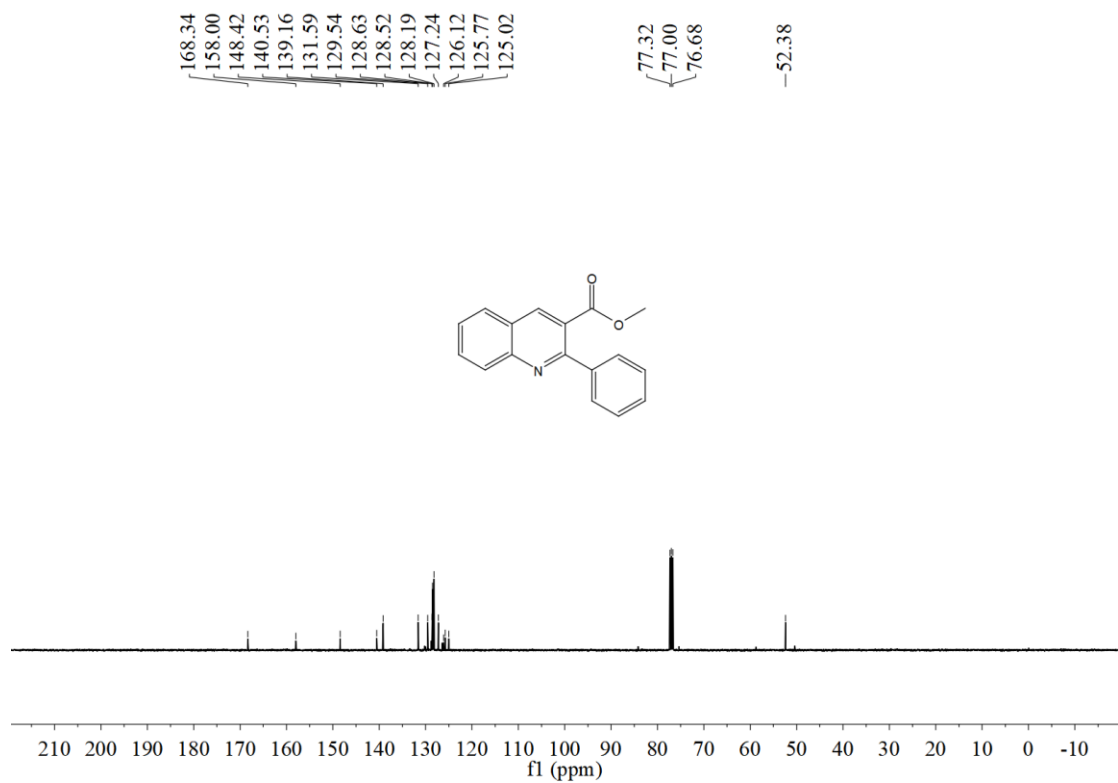

Supplement: d4qo01050g1.pdf [file d4qo01050g1.pdf]
